# Supplementary material for: Cross-sectional study of prescribing errors in patients admitted to nine hospitals across North West England
Source: PubMed Central journal article supplement — BMJ Open. 2013 Jan 10;3(1):e002036. doi: 10.1136/bmjopen-2012-002036 (PMC3553389; doi:10.1136/bmjopen-2012-002036), 2013-01-10
Supplement: bmjopen-2012-002036.draft_revisions.pdf [file bmjopen-2012-002036.draft_revisions.pdf]

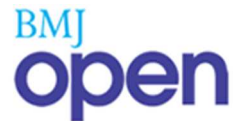

## Cross Sectional Study of Prescribing Error in Patients Admitted to Nine Hospitals Across North West England

|                                 |                                                                                                                                                                                                                                                                                                                                                                                                                                                                                                                                                                                                                                                                                                                                                                                                                                                                                                                                                                                                                                                                                                                                                                                                                                                                                                  |
|---------------------------------|--------------------------------------------------------------------------------------------------------------------------------------------------------------------------------------------------------------------------------------------------------------------------------------------------------------------------------------------------------------------------------------------------------------------------------------------------------------------------------------------------------------------------------------------------------------------------------------------------------------------------------------------------------------------------------------------------------------------------------------------------------------------------------------------------------------------------------------------------------------------------------------------------------------------------------------------------------------------------------------------------------------------------------------------------------------------------------------------------------------------------------------------------------------------------------------------------------------------------------------------------------------------------------------------------|
| Journal:                        | <i>BMJ Open</i>                                                                                                                                                                                                                                                                                                                                                                                                                                                                                                                                                                                                                                                                                                                                                                                                                                                                                                                                                                                                                                                                                                                                                                                                                                                                                  |
| Manuscript ID:                  | bmjopen-2012-002036                                                                                                                                                                                                                                                                                                                                                                                                                                                                                                                                                                                                                                                                                                                                                                                                                                                                                                                                                                                                                                                                                                                                                                                                                                                                              |
| Article Type:                   | Research                                                                                                                                                                                                                                                                                                                                                                                                                                                                                                                                                                                                                                                                                                                                                                                                                                                                                                                                                                                                                                                                                                                                                                                                                                                                                         |
| Date Submitted by the Author:   | 31-Aug-2012                                                                                                                                                                                                                                                                                                                                                                                                                                                                                                                                                                                                                                                                                                                                                                                                                                                                                                                                                                                                                                                                                                                                                                                                                                                                                      |
| Complete List of Authors:       | Seden, Kay; University of Liverpool, Faculty of Health & Life Sciences; Royal Liverpool and Broadgreen University Hospital Trust, NIHR Biomedical Research Centre<br>Kirkham, Jamie; University of Liverpool, Department of Biostatistics<br>Kennedy, Tom; University of Liverpool, Faculty of Health & Life Sciences<br>Lloyd, Michael; Whiston Hospital- St Helens and Knowsley Teaching Hospitals NHS Trust, Pharmacy Department<br>James, Sally; Royal Liverpool and Broadgreen University Hospitals NHS Trust, Pharmacy Department<br>McManus, Aine; Royal Liverpool and Broadgreen University Hospitals NHS Trust, Pharmacy Department<br>Ritchings, Andrew; Mid Cheshire Hospitals NHS Foundation Trust, Pharmacy Department<br>Simpson, Jennifer; Warrington and Halton Hospitals NHS Foundation Trust, Pharmacy Department<br>Thornton, Dave; Aintree University Hospitals NHS Foundation Trust, Pharmacy Department<br>Gill, Andrea; Alder Hey Children's Hospital NHS Foundation Trust, Pharmacy Department<br>Coleman, Carolyn; Nobles Hospital, Douglas, Isle of Man, Pharmacy Department<br>Thorpe, Bethan; Cheshire and Wirral Partnership NHS Foundation Trust, Pharmacy Department<br>Khoo, Saye; University of Liverpool, Faculty of Health & Life Sciences; Univ of Liverpool |
| <b>Primary Subject Heading</b>: | Health services research                                                                                                                                                                                                                                                                                                                                                                                                                                                                                                                                                                                                                                                                                                                                                                                                                                                                                                                                                                                                                                                                                                                                                                                                                                                                         |
| Secondary Subject Heading:      | Health services research                                                                                                                                                                                                                                                                                                                                                                                                                                                                                                                                                                                                                                                                                                                                                                                                                                                                                                                                                                                                                                                                                                                                                                                                                                                                         |
| Keywords:                       | EDUCATION & TRAINING (see Medical Education & Training), Quality in health care < HEALTH SERVICES ADMINISTRATION & MANAGEMENT, Risk management < HEALTH SERVICES ADMINISTRATION & MANAGEMENT                                                                                                                                                                                                                                                                                                                                                                                                                                                                                                                                                                                                                                                                                                                                                                                                                                                                                                                                                                                                                                                                                                     |
|                                 |                                                                                                                                                                                                                                                                                                                                                                                                                                                                                                                                                                                                                                                                                                                                                                                                                                                                                                                                                                                                                                                                                                                                                                                                                                                                                                  |

1  
2  
3  
4 **Cross Sectional Study of Prescribing Error in Patients Admitted to Nine Hospitals**  
5 **Across North West England**  
6  
7

8  
9 Seden K<sup>1,2</sup>, Kirkham JJ<sup>3</sup>, Kennedy T<sup>2</sup>, Lloyd M<sup>4</sup>, James S<sup>5</sup>, Mcmanus A<sup>5</sup>, Ritchings A<sup>6</sup>,  
10 Simpson J<sup>7</sup>, Thornton D<sup>8</sup>, Gill A<sup>9</sup>, Coleman C<sup>10</sup>, Thorpe B<sup>11</sup>, Khoo SH<sup>1,2</sup>  
11

12  
13  
14 NIHR Biomedical Research Centre, Royal Liverpool and Broadgreen University Hospital  
15 Trust, Liverpool, UK<sup>1</sup>; Faculty of Health & Life Sciences, University of Liverpool, Liverpool,  
16 UK<sup>2</sup>; Department of Biostatistics, University of Liverpool, Liverpool, UK<sup>3</sup>; Pharmacy  
17 Department, Whiston Hospital- St Helens and Knowsley Teaching Hospitals NHS Trust,  
18 Whiston, UK<sup>4</sup>; Pharmacy Department, Royal Liverpool and Broadgreen University Hospitals  
19 NHS Trust, Liverpool, UK<sup>5</sup>; Pharmacy Department, Mid Cheshire Hospitals NHS Foundation  
20 Trust, Cheshire, UK<sup>6</sup>; Pharmacy Department, Warrington and Halton Hospitals NHS  
21 Foundation Trust, Warrington, UK<sup>7</sup>; Pharmacy Department, Aintree University Hospitals  
22 NHS Foundation Trust, Liverpool, UK<sup>8</sup>; Pharmacy Department, Alder Hey Children's Hospital  
23 NHS Foundation Trust, Liverpool, UK<sup>9</sup>; Pharmacy Department, Nobles Hospital, Douglas,  
24 Isle of Man, UK<sup>10</sup>; Pharmacy Department, Cheshire and Wirral Partnership NHS Foundation  
25 Trust, Wirral, UK<sup>11</sup>  
26  
27  
28  
29  
30  
31

32 Corresponding Author: Saye Khoo  
33 Pharmacology Research Laboratories  
34 H Block, 1<sup>st</sup> Floor  
35 70 Pembroke Place  
36 Liverpool  
37 L69 3GF, UK  
38 [Khoo@liv.ac.uk](mailto:Khoo@liv.ac.uk)  
39  
40  
41  
42  
43  
44  
45  
46  
47  
48  
49  
50  
51  
52  
53  
54  
55  
56  
57  
58  
59  
60

## Article Summary

### 1. Article Focus

- Some studies have reported lower error rates with more senior prescriber grades, and insufficient undergraduate prescriber training as a potential risk for prescribing errors
- Prescriptions frequently contain multiple medications, but data about errors on complete prescriptions, which give a better estimate of numbers of patients at risk of harm, are lacking
- We aimed to determine the differences in prescribing error rates between grades of prescriber, ward area, admission or discharge and type of medication prescribed

### 2. Key Messages

- We observed an error rate of 10.9% per prescribed item, with only 56.2% of 4238 complete prescriptions remaining error free.
- In multivariate analysis, the strongest predictor for prescribing error was the number of medicines on each prescription.
- We found no overall difference in error rate amongst different grades of prescriber, and newly qualified doctors were not more likely to make errors than their senior colleagues.

### 3. Strengths and Limitations

- This was a large study across nine diverse hospital settings
- We determined the rate of errors on complete prescriptions rather than individually prescribed items, giving a better estimate of the numbers of patients affected by errors.
- We did not evaluate the impact of electronic prescribing on the prevalence and type of prescribing errors, however up to a quarter of the errors observed could potentially have been avoided through use of electronic prescribing and medicines administration systems

**Abstract**

**Objective** To evaluate the prevalence, type and severity of prescribing errors made by different categories of prescriber, and the prevalence, type and severity of prescribing errors occurring at admission compared with on discharge prescriptions.

**Design** Ward-based clinical pharmacists prospectively documented prescribing errors at the point of clinically checking admission or discharge prescriptions. Error categories and severities were assigned at the point of data collection, and verified independently by the study team

**Setting** Prospective study of nine diverse National Health Service (NHS) hospitals in North West England, including teaching hospitals, district hospitals and specialist services for paediatrics, women and mental health.

**Results** Of 4238 prescriptions evaluated, one or more error was observed in 1857 (43.8%) prescriptions, with a total of 3011 errors observed. Of these, 1264 (41.9%) were minor, 1629 (54.1%) were significant, 109 (3.6%) were serious and 9 (0.30%) were potentially life-threatening. The majority of errors considered to be potentially lethal (n=9) were dosing errors (n=8), mostly relating to overdose (n=7). The rate of error was not significantly different between newly qualified doctors compared with junior, middle grade or senior doctors. Multivariable analyses revealed the strongest predictor of error was the number of items on a prescription (risk of error increased 14% for each additional item). We observed a high rate of error from medication omission, particularly amongst patients admitted acutely into hospital. Electronic prescribing systems could potentially have prevented up to a quarter of (but not all) errors.

**Conclusions** In contrast to other studies, prescriber experience did not impact on overall error rate (although there were qualitative differences in error category). Given that multiple drug therapies are now the norm for many medical conditions, health systems should introduce and retain safeguards which detect and prevent error, in addition to continuing training and education, and migration to electronic prescribing systems.

## Introduction

Prescribing error is common, with systematic reviews suggesting that as many as 50% of hospital admissions and 7% of medication orders are affected.<sup>1</sup> In recent studies, prescribing errors have been found to affect approximately 9-15% of medication orders for hospital inpatients in the United Kingdom (UK).<sup>2,3</sup> Over one third of 651 patients were found to have a prescribing error occurring at hospital admission in the United States (US).<sup>4</sup> Prescribing errors are also prevalent in primary care, affecting 37% of 9385 prescriptions in the US,<sup>5</sup> and one in eight patients (one in 20 prescription items) in the UK.<sup>6</sup> In a UK study of 3695 inpatient episodes, 15% of patients experienced an adverse drug reaction (ADR), more than half of which were considered definitely or possibly avoidable. 59% of ADRs were linked to drug interactions, and ADRs were found to increase length of hospital stay in 27% of episodes.<sup>7</sup> A study evaluating medication omission errors in elderly patients admitted to hospital reported adverse consequences in 21% of 100 patients.<sup>8</sup>

Human error in healthcare may be considered in the context of individuals or health systems.<sup>9-11</sup> While personal factors such as forgetfulness, inattention, poor motivation, carelessness, negligence, and recklessness are important, a health systems approach more comprehensively addresses recurrent errors and organisation factors and processes which may give rise to that error. The person, the team, the task, the workplace and the institution as a whole are considered,<sup>9</sup> which identify weaknesses in the system's defences.<sup>9</sup> For example, higher hospital mortality at weekends may be associated with lower numbers of senior staff available outside of the normal working week.<sup>12,13</sup>

Data on causes of prescribing errors, for example differences between grades of prescriber, ward area, admission or discharge and type of medication prescribed are sparse.<sup>3,14,15</sup> Existing data suggest that newly qualified and junior doctors are twice as likely to make prescribing errors than senior doctors.<sup>3</sup> Provision of sufficient undergraduate training to allow medical students to become safe prescribers when they begin work as newly qualified doctors is widely recognised as an important factor in reducing prescribing errors.<sup>14,16-18</sup> Teaching in UK medical schools has changed considerably over the last decade, with the General Medical Council stipulating that medical students must be adequately prepared to prescribe drugs and manage risk at the point of graduation.<sup>19,20</sup>

Whilst previous studies have evaluated error for individual medications, few studies have systematically evaluated complete prescriptions to evaluate factors associated with prescribing error.<sup>1-3</sup> This is important as it gives a more accurate estimate of the numbers of patients who are potentially put at risk of harm by prescribing errors. We undertook a prospective survey of prescribing errors in nine diverse National Health Service (NHS) hospitals in the North West of England, to examine the prevalence, type and severity of errors made by different categories of prescriber, and also the prevalence, type and severity of prescribing errors at admission, discharge and in different ward areas. Specifically, we recorded only errors concerned with issuing of the prescription, excluding errors in clinical decision making, or 'downstream' errors in executing the prescription.

## Methods

### **Data Collection**

A total of nine NHS hospitals from the Merseyside and Cheshire region took part in the audit. These comprised large teaching hospitals, general hospitals, specialist centres for paediatrics, women's health and mental health. As this was a survey of unlinked anonymised prescriptions, Ethics approval was not required in accordance with local guidance.

A standard questionnaire collected data on error category and severity (based on EQUIP error classifications). The EQUIP study was a large prospective survey of prescribing errors affecting hospital inpatients in the UK,<sup>3</sup> and the error classifications were therefore considered relevant to our setting. Nominated ward-based clinical pharmacists prospectively documented prescribing errors at the point of checking admission or discharge prescriptions, during normal pharmacy working hours. Acute admission was defined as the first 24 hours in hospital. For all prescription sheets generated in acute admission settings, a separate form was completed (to allow for emergency prescribing in the absence of a full drug history without this being recorded as an error) and we sought to record only unintended medication omissions (e.g. following medicines reconciliation with general practices or primary healthcare databases). Hospitals were advised to complete the study over alternate days through the period of the audit, for example Monday in week one, Tuesday in week two, Wednesday in week three, in order to minimise inadvertent double auditing of the same patient on admission to hospital and subsequent admission to a ward.

### **Prescriber Category**

Pharmacists were required to indicate the category of prescribers on data collection forms. For this analysis, prescribers were categorised as follows: newly qualified (Foundation Year 1, House officers), Junior (Foundation Year 2, specialist or 'core' training years 1 & 2), mid grade (specialist registrars, training Fellows), senior (Consultant), non-medical (nurse or pharmacist prescribers), other (for example locum doctors for whom grade was unclear or not recorded) and unknown (information not recorded).

### **Grading of prescribing errors**

We modified EQUIP study criteria<sup>3</sup> for error categorisation and severity classification by adding or clarifying severity criteria for all error categories, and by grouping errors into distinct areas according to origin (see below and Table 1). 'Exclusion' and 'inclusion' of errors into EQUIP study error types were defined, in order to differentiate categories with potential overlap. Severity ratings were further defined and assigned to each error category based on modified EQUIP study criteria, the perceptions of the original pharmacist gradings, and reference to the licensing information of the relevant medication. In order to limit misclassification error, the original 29 EQUIP categories were batched into 10 different types of error groups as follows: (1) Dosing errors, (2) Writing errors, (3) Allergy status errors, (4) Duration of treatment wrong/not specified, (5) Drug interactions, (6) Omission of medication, (7) Excessive/unnecessary prescribing, (8) Safety errors, (9) Lack of clear directions for administration, (10) a new error category (Miscellaneous) was added (Table 1).

Despite using a standard set of definitions, we noted discrepancies across various hospitals in both error categorisation and severity rating. In particular there was a tendency to over-call errors and to overestimate their potential severity. This was confirmed by a *post-hoc* inter-rater agreement analysis. A set of six sample prescriptions was generated. A list of 14 standard errors was decided by the study team, including study error type and severity,

1  
2  
3 according to the criteria in Table 1 utilised for analysis of the main study. Six pharmacists  
4 from each participating hospital were asked to each screen the six prescription scenarios  
5 and to record errors, allocating error types and severities. The exact agreement  
6 percentages between category classification, severity classification and both combined  
7 were computed to measure the absolute concordances between pharmacist scores against  
8 the gold standard assessment. For all prescriptions, approximately 75% of error categories  
9 were correctly identified by pharmacists when compared to the standards. Only 47% of  
10 severity ratings were concordant with the standards, and 40% of pharmacists rated both  
11 error category and severity in concordance with the standards.  
12  
13

14  
15 Therefore, in order to limit inter-observer bias, all grading and severity of errors identified in  
16 the main study were independently reassessed by two members of the study team (KS and  
17 SK), with discordant assessments collectively discussed with a third (TK) in order to agree a  
18 final categorisation for error type and severity. 143 errors were not considered true errors of  
19 the process of prescribing and were excluded. The error category was re-graded for 434  
20 errors, and severity was re-graded for 724 errors, which was predominantly a down-grading.  
21  
22

### 23 **Statistical Analyses**

24  
25 Data were analysed at the prescription level using complete case data. The prevalence and  
26 severity of errors observed were tabulated using percentage frequencies. A forest plot was  
27 produced to present the error incidence rate and 95% confidence interval (95% CI) for each  
28 hospital and grade of prescriber. For the formal statistical analysis, when there was more  
29 than one error on a prescription, only the most severe error was included. In this study, we  
30 assessed hospital, prescriber grade (newly qualified, junior, mid-grade, senior, non-medical,  
31 other), ward area (medical, surgical, A&E, mental health, critical care), number of prescribed  
32 medicines, an indicator to denote whether the prescription was prescribed on admission or  
33 on discharge and an indicator to denote whether the prescriber was Liverpool trained or not  
34 as potential risk factors. Univariate statistical analyses were performed using a chi-squared  
35 test except for continuous data, which were analysed using the Mann-Whitney U test. A  
36 multivariate logistic regression model for a prescription error was fitted to the data. Results  
37 are given in terms of an odds ratio (OR) and associated 95% CI. All risk factors that were  
38 statistically significant ( $p < 0.1$ ) in the univariate analysis were considered for inclusion in the  
39 multivariate model with the exception of ward area as a number of hospitals only reported a  
40 single specialty type.  
41  
42

43 All statistical analysis was carried out using the statistical software package SPSS (version  
44 20) using a two-sided significance level of 0.05 (5%) throughout.  
45  
46  
47  
48  
49  
50  
51  
52  
53  
54  
55  
56  
57  
58  
59  
60

## Results

### *Descriptive data and severity of errors*

A total of 4238 prescriptions were evaluated; of these, 1857 (43.8%) prescriptions contained at least one error (Table 2). The overall incidence of prescribing errors (number of prescriptions with one or more error/prescriptions evaluated) ranged from 20% to 60% across the nine hospitals (Figure 1a).

A total of 3011 individual errors were observed within the 1857 prescriptions containing an error. Of these 3011 errors, 1264 (41.9%) were minor, 1629 (54.1%) were significant, 109 (3.6%) were serious and nine (0.30%) were potentially life-threatening (Table 2). Details of all potentially life-threatening errors are listed in Table 3 and mainly comprised dosing errors (n=8), particularly overdose (n=7), with one incidence of under dose. A further error considered to be potentially lethal related to prescription of a medicine to which the patient had previously had a serious allergic reaction.

The proportion of errors categorised with severity as significant or higher by prescriber grade were as follows: all prescribers 58.0%, newly qualified 51.2%, junior 60.8%, mid grade 66.4%, senior 57.6% (Table 2).

Fewer errors were observed on discharge prescriptions than on prescriptions written on admission. More errors were observed in prescriptions containing antibiotics, insulin, warfarin and oxygen, although this does not take into account the number of items on each prescription. Whether doctors were Liverpool trained or not did not affect the number of errors observed (Table 2).

### *Error types*

The most frequent error types for all prescribers were medication omission, accounting for 26.9%, writing errors accounting for (20.7%) and dosing errors accounting for (20.6%) of all errors recorded. There was little difference in the variability of error types across different prescriber grades (Figure 2).

### *Risk factor analysis*

Results of the univariate analysis are shown in Table 4. All factors considered appeared to show a significant difference except for medical school training of doctors, which made no significant difference ( $p=0.91$ ) to whether an error occurred on the prescription. Multivariate risk factor analysis showed that the likelihood of an error increased for every additional item included on the prescription (OR 1.14, 95% C 1.12, 1.17,  $p<0.001$ ) (Table 4). Therefore, for each additional item on the prescription, the risk of an error occurring increased by about 14%. There was also a trend towards errors being more likely to occur on admission prescriptions than on discharge prescriptions, with an odds ratio (OR) of 1.16 (95% CI 0.70, 1.92,  $p=0.58$ ), although this difference did not reach statistical significance (Table 5). No significant differences were found in error rates between different prescriber grades. (Figure 1b, Figure 2).



## Discussion

In this large study, only 56.2% of 4238 prescriptions written had no reported errors. Of the errors recorded, 41.9% were minor, 54.1% significant, 3.6% serious and 0.3% potentially life threatening. It is important to note that severity ratings relate to the potential severity had the error been allowed to progress through to the patient - in fact the majority of errors were corrected prior to the point of administration. In multivariate analysis, the strongest predictor for prescribing error was the number of medicines on each prescription, with risk for prescribing error increasing by 14% for every additional medication item prescribed. Where data were available, prescriptions contained an average of 6.3 medication items, although this varied from 2.4 – 7.5 items according to medical specialty surveyed. Uncorrected analyses suggested that errors were frequent in prescriptions containing insulin (15.5%), antibiotics (18%), warfarin (9.2%) and oxygen (5.6%), although these patients were very likely to have been receiving multiple medications. Error rates were highest amongst specialties which prescribed a broad range of medications (e.g. acute medicine, compared to elective surgery), and also differed between different hospital Trusts, with hospitals specialising in paediatrics (Hospital I), maternal health (Hospital G) and mental health (Hospital D) exhibiting the lowest error rates. However, when corrected for number of medications, these differences did not remain significant.

The most frequent error encountered was unintended medication omission following acute hospital admission (0.97 errors/prescription written, versus 0.53 for discharge medications). When adjusted in multivariable analyses (Table 5) there was no statistically significant difference in error rates between admission and discharge. We found no overall difference in error rate amongst different grades of prescriber, and newly qualified doctors were not more likely to make errors than their senior colleagues. Although numbers were relatively small, we observed no difference in error rate amongst newly qualified doctors by undergraduate training, and doctors trained in Liverpool were neither more nor less likely to commit medication errors. The categories and severity of errors made by different prescriber grades were broadly similar (Table 2, Figure 2), however some differences were observed. For example, writing errors were more frequently observed with newly qualified doctors, medication omission was more frequently observed with junior and mid grade doctors, and dosing errors were more frequently observed with mid grade doctors.

These results are consistent with previously published studies. Both the EQUIP and PRACTiCe Studies<sup>3 6</sup> reported error rates of approximately 1 in 10 medications prescribed (we observed a rate of 10.9%). Given the high number of medications prescribed (mean of 6.3 items/prescription) nearly half of all prescriptions contained at least one error. A systematic review found prescribing errors to be more common in adults than in children.<sup>1</sup> A study in Spain comparing paediatric wards with obstetrics found that paediatric patients had a fourfold higher risk of serious errors than the maternity population (2.3% vs 14.3%), which were mainly related to drug dosing, which is in keeping with our data.<sup>21</sup> Another study reported that prescribing errors were more common in primary care amongst men compared to women.<sup>6</sup>

In the EQUIP study, multivariate analysis showed that all grades of doctors were more likely to write a prescription containing an error than consultants.<sup>3</sup> A retrospective study which evaluated errors on discharge prescriptions found no significant difference in error rates between prescriber grades, although no senior (consultant) level prescribers were included.<sup>15</sup> In primary care, the grade of general practitioner was not associated with

1  
2  
3 prescribing errors.<sup>6</sup> EQUIP also reported that medication orders issued at acute admission  
4 were 70% more likely to be associated with a prescribing error.<sup>3</sup> Another study found lower  
5 error rates on discharge prescriptions than general inpatient prescribing, due a lower rate of  
6 medication omission, however these factors were not corrected for the number of items on  
7 each prescription.<sup>2</sup>  
8

9  
10 Our study was limited by missing data (one acute hospital failed to return data on number of  
11 items on each prescription), and although pharmacists had received some basic training in  
12 completing the evaluations, post-hoc analyses suggested significant variability between  
13 pharmacists' classification of errors, and especially in assignment of severity classification.  
14 Two of us independently revised each prescribing error and noted a tendency to over-call  
15 the severity of errors, and (in keeping with EQUIP criteria) included in our evaluations an  
16 assessment of whether or not a wrong dose was likely to have been actually administered  
17 based on tablet burden. We also refined EQUIP criteria to assign severity ratings to error  
18 categories where these had previously not been provided. Finally, by grouping errors into  
19 categories according to their origin and cause, we sought to reduce misclassification as far  
20 as possible. Since our data collection forms did not allow us to evaluate errors which had  
21 been missed, it is possible that our observed error rates may represent an under-estimate of  
22 the true burden of prescribing error.  
23  
24

25  
26 Medication omission was the most prevalent error, representing 26.9% of all errors  
27 observed, which is consistent with previous reports.<sup>2 15</sup> Prescribing during acute admission  
28 in the absence of a full medication history may sometimes be unavoidable, and does not  
29 necessarily constitute an error. For this reason we discriminated between 'emergency'  
30 prescribing, and errors where a more complete or accurate medication history would have  
31 prevented omission of prescribed medications. Although we sought to capture only  
32 unintended medication omission, it is possible that there might still have been cases where  
33 the omission was intentional (for example, suspension of diuretics in a patient who was  
34 hypotensive or dehydrated on admission) but this intent had been missed by the pharmacist  
35 collecting the data. A sensitivity analysis showed that if all errors of medication omission  
36 either on discharge or admission were excluded, the number of errors totals 2249 (0.53 per  
37 prescription written); with 1471 (34.7%) prescriptions containing at least one error.  
38  
39  
40

41  
42 EQUIP error categories which could potentially be eliminated by introduction of electronic  
43 prescribing (Strength/dose missing, Product/formulation not specified, No signature, Start  
44 date incorrect/missing, incorrect route, IV instructions incorrect/missing) accounted for 357  
45 (11.9%) of the 3011 errors observed. A further 376 (12.5%) errors could be reduced by  
46 electronic prescribing, via alerts, cautions and required fields at the patient entry/prescribing  
47 stage, although many of these can be over-ridden by the prescriber.<sup>22</sup> These include:  
48 administration times missing/incorrect, duplication, CD requirements incorrect/missing. The  
49 extent to which electronic prescribing can eliminate particular error types depends on the  
50 individual systems used. Importantly, whilst electronic prescribing systems could potentially  
51 have prevented up to a quarter of errors, these systems are best utilised alongside rather  
52 than instead of existing safeguards. Although one hospital (Hospital G) was utilising  
53 electronic prescribing systems, and many of the other hospitals were using electronically  
54 generated discharge summaries, we failed to observe any clear association with error rate,  
55 mainly because of the large variability in case mix which impacted directly on the number of  
56 items/prescription. In contrast, EQUIP reported that electronic prescriptions were 12% less  
57 likely to be associated with a prescribing error than handwritten prescriptions.<sup>3</sup> Although  
58 electronic discharge summaries may reduce error due to legibility, they do not eliminate the  
59  
60

1  
2  
3 transcription step from inpatient charts. One study which analysed 1808 handwritten and  
4 electronic discharge summaries found no difference in the number or types of errors  
5 observed.<sup>15</sup> It is also worth noting that electronic systems, while clearly offering an  
6 advantage over conventional medicines management and prescribing systems, have  
7 themselves been associated with new patterns of error. Studies in the UK and Australia  
8 found a significant reduction in prescribing errors detected after introduction of electronic  
9 prescribing systems, but also identified errors specific to the electronic prescribing system  
10 used, for example, incorrect product selected from drop-down menu, or incorrect dosing  
11 frequency selected.<sup>23-25</sup> These electronic systems will doubtless continue to improve  
12 through refinement.<sup>22 26</sup>  
13  
14

15  
16 The Erice Medication Errors Research Group (EMERGE) recommendations for reducing  
17 prescribing errors, includes training and assessment of prescribers, ongoing monitoring,  
18 awareness and communication.<sup>14</sup> Health systems which may impact on likelihood of error  
19 occurring include European harmonisation of prescribing, introduction of integrated  
20 prescription forms, use of IT systems such as electronic prescribing, and standardisation,  
21 evaluation, and certification of such systems. Involvement of clinical pharmacists at all points  
22 of the medication process is also recommended.<sup>14</sup> The latter is important since all the  
23 hospital Trusts in our survey had evolved systems to safeguard patients from prescribing  
24 error (regardless of the adoption of electronic prescribing), and this involved use of ward-  
25 based pharmacists and dispensary staff to perform routine checks on all prescriptions issued  
26 <sup>3 10 21 27</sup>. This arguably represents the 'last line of defence' against prescribing error, and has  
27 greatest utility when deployed in clinical areas associated with highest risk. One fundamental  
28 role of clinical pharmacists during acute admission is medicines reconciliation, where a  
29 patient's full medication history is determined and recorded using all available sources of  
30 information. Our findings suggest that removing this safeguard (e.g. through service  
31 reconfiguration or in an effort to reduce costs) could potentially lead to higher numbers of  
32 medication error actually reaching the patient.  
33  
34  
35  
36  
37  
38  
39  
40  
41  
42  
43  
44  
45  
46  
47  
48  
49  
50  
51  
52  
53  
54  
55  
56  
57  
58  
59  
60

### **Acknowledgements**

We gratefully acknowledge the contributions of pharmacists who participated in this study. This work was funded through an unrestricted educational grant from Mersey Deanery, although design, execution, analysis and reporting was carried out independently by the study team.

We thank the National Institute of Health Research (NIHR Department of Health) and the Northwest Development Agency (NWDA) for infrastructural and project support.

### **Declaration**

All authors have completed the Unified Competing Interest form and declare that (1) SK has received research funding for website development from Merck, Bristol Myers Squibb, Gilead, ViiV, Tibotec, and Abbott, and honoraria, travel support for conference attendance from Roche, Tibotec, and Viiv in the past 3 years. All other authors have nothing to declare

TK and SHK developed the study concept, ML, SJ, AMc, AR, JS, AG, CC, BT co-ordinated data collection, KS, SHK analysed the data, JJK undertook the main statistical analysis with tabulations produced by KS. KS, SHK prepared the manuscript. JJK was involved in substantial revisions of the manuscript. TK, ML, SJ, AMc, AR, JS, AG, CC, BT reviewed the manuscript, SHK is the guarantor for the project.

All authors, external and internal, had full access to all of the data (including statistical reports and tables) in the study and can take responsibility for the integrity of the data and the accuracy of the data analysis

Data sharing: all requests for data sharing to Professor SH Khoo (khoo@liv.ac.uk)

The Corresponding Author has the right to grant on behalf of all authors and does grant on behalf of all authors, an exclusive licence (or non exclusive for government employees) on a worldwide basis to the BMJ Publishing Group Ltd to permit this article (if accepted) to be published in BMJ editions and any other BMJ PGL products and sublicences such use and exploit all subsidiary rights, as set out in our licence

## References

1. Lewis PJ, Dornan T, Taylor D et al. Prevalence, incidence and nature of prescribing errors in hospital inpatients: a systematic review. *Drug Saf* 2009;32:379-89.
2. Franklin BD, Reynolds M, Shebl NA et al. Prescribing errors in hospital inpatients: a three-centre study of their prevalence, types and causes. *Postgrad Med J* 2011;87:739-45.
3. An in depth investigation into causes of prescribing errors by foundation trainees in relation to their medical education: EQUIP study final report. [http://www.gmc-uk.org/FINAL\\_Report\\_prevalence\\_and\\_causes\\_of\\_prescribing\\_errors.pdf\\_28935150.pdf](http://www.gmc-uk.org/FINAL_Report_prevalence_and_causes_of_prescribing_errors.pdf_28935150.pdf)
4. Gleason KM, McDaniel MR, Feinglass J et al. Results of the Medications at Transitions and Clinical Handoffs (MATCH) study: an analysis of medication reconciliation errors and risk factors at hospital admission. *J Gen Intern Med* 2010;25:441-7.
5. Abramson EL, Bates DW, Jenter C et al. Ambulatory prescribing errors among community-based providers in two states. *J Am Med Inform Assoc* 2012;19:644-8
6. The PRACtICe Study (PREvalence And Causes of prescribing errors in general practiCe) A report for the GMC May 2012 [http://www.gmc-uk.org/Investigating\\_the\\_prevalence\\_and\\_causes\\_of\\_prescribing\\_errors\\_in\\_general\\_practice\\_The\\_PRACtICe\\_study\\_Report\\_May\\_2012\\_48605085.pdf](http://www.gmc-uk.org/Investigating_the_prevalence_and_causes_of_prescribing_errors_in_general_practice_The_PRACtICe_study_Report_May_2012_48605085.pdf)
7. Davies EC, Green CF, Taylor S et al. Adverse drug reactions in hospital in-patients: a prospective analysis of 3695 patient-episodes. *PLoS One* 2009;4:e4439.
8. Drenth-van Maanen AC, Spee J, van Hensbergen L, et al. Structured history taking of medication use reveals iatrogenic harm due to discrepancies in medication histories in hospital and pharmacy records. *J Am Geriatr Soc* 2011;59:1976-7.
9. Reason J. Human error: models and management. *BMJ* 2000;320:768-70.
10. Dean B, Schachter M, Vincent C et al. Causes of prescribing errors in hospital inpatients: a prospective study. *Lancet* 2002;359:1373-8.
11. Barber N, Rawlins M, Dean Franklin B. Reducing prescribing error: competence, control, and culture. *Qual Saf Health Care* 2003;12 Suppl 1:i29-32.
12. Inside your Hospital: Dr. Foster Hospital Guide 2001-2011. Dr Foster Intelligence/Department of Health L, UK. Available from URL: [http://drfosterintelligence.co.uk/wp-content/uploads/2011/11/Hospital\\_Guide\\_2011.pdf](http://drfosterintelligence.co.uk/wp-content/uploads/2011/11/Hospital_Guide_2011.pdf), date last accessed 13/3/12.
13. Hospital Patients 'More Likely to Die at Weekends' BBC News, London. Available from URL: <http://www.bbc.co.uk/news/health-15895663>, date last accessed 13/3/12.
14. Agrawal A, Aronson JK, Britten N et al. Medication errors: problems and recommendations from a consensus meeting. *Br J Clin Pharmacol* 2009;67:592-8.
15. Callen J, McIntosh J, Li J. Accuracy of medication documentation in hospital discharge summaries: A retrospective analysis of medication transcription errors in manual and electronic discharge summaries. *Int J Med Inform* 2010;79:58-64.
16. Likic R, Maxwell SR. Prevention of medication errors: teaching and training. *Br J Clin Pharmacol* 2009;67:656-61.
17. Harding S, Britten N, Bristow D. The performance of junior doctors in applying clinical pharmacology knowledge and prescribing skills to standardized clinical cases. *Br J Clin Pharmacol* 2010;69:598-606.
18. Goldacre MJ, Taylor K, Lambert TW. Views of junior doctors about whether their medical school prepared them well for work: questionnaire surveys. *BMC Med Educ* 2010;10:78.
19. Tomorrow's Doctors, General medical Council, London, UK. February 2003. Available from URL: [http://www.gmc-uk.org/static/documents/content/TomorrowsDoctors\\_2003.pdf](http://www.gmc-uk.org/static/documents/content/TomorrowsDoctors_2003.pdf).
20. Tomorrow's Doctors. General Medical Council, London UK. September 2009. Available from URL: [http://www.gmc-uk.org/static/documents/content/TomorrowsDoctors\\_2009.pdf](http://www.gmc-uk.org/static/documents/content/TomorrowsDoctors_2009.pdf)

- 1
- 2
- 3 21. Fernandez-Llamazares CM, Calleja-Hernandez MA, Manrique-Rodriguez S et al.
- 4 Prescribing errors intercepted by clinical pharmacists in paediatrics and obstetrics in
- 5 a tertiary hospital in Spain. *Eur J Clin Pharmacol* 2012;68(9):1339-45
- 6 22. Scott GP, Shah P, Wyatt JC et al. Making electronic prescribing alerts more effective:
- 7 scenario-based experimental study in junior doctors. *J Am Med Inform Assoc*
- 8 2011;18:789-98.
- 9 23. Donyai P, O'Grady K, Jacklin A et al. The effects of electronic prescribing on the quality
- 10 of prescribing. *Br J Clin Pharmacol* 2008;65:230-7.
- 11 24. Westbrook JI, Reckmann M, Li L et al. Effects of two commercial electronic prescribing
- 12 systems on prescribing error rates in hospital in-patients: a before and after study.
- 13 *PLoS Med* 2012;9:e1001164.
- 14 25. Jani YH, Barber N, Wong IC. Republished error management: Paediatric dosing errors
- 15 before and after electronic prescribing. *Postgrad Med J* 2011;87:565-8.
- 16 26. Nanji KC, Rothschild JM, Salzberg C et al. Errors associated with outpatient
- 17 computerized prescribing systems. *J Am Med Inform Assoc* 2011;18:767-73.
- 18 27. Klopotoska JE, Kuiper R, van Kan HJ et al. On-ward participation of a hospital
- 19 pharmacist in a Dutch intensive care unit reduces prescribing errors and related
- 20 patient harm: an intervention study. *Crit Care* 2010;14:R174.
- 21
- 22
- 23
- 24
- 25
- 26
- 27
- 28
- 29
- 30
- 31
- 32
- 33
- 34
- 35
- 36
- 37
- 38
- 39
- 40
- 41
- 42
- 43
- 44
- 45
- 46
- 47
- 48
- 49
- 50
- 51
- 52
- 53
- 54
- 55
- 56
- 57
- 58
- 59
- 60

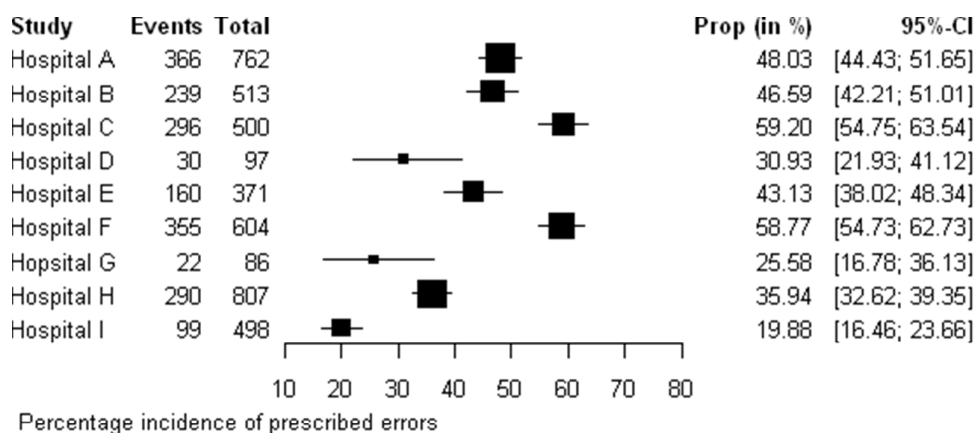

**Figure 1a.** Forest plot showing prescribing error rates in nine hospitals across North West England.

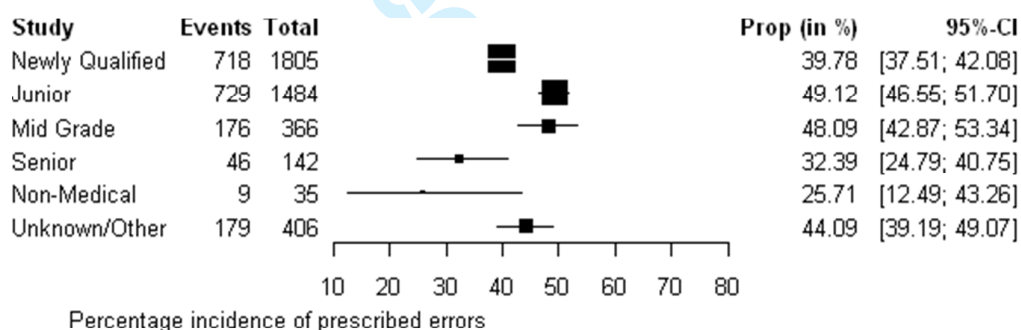

**Figure 1b.** Forest plot showing prescribing error rates made by different prescriber grades

1  
2  
3  
4  
5  
6  
7  
8  
9  
10  
11  
12  
13  
14  
15  
16  
17  
18  
19  
20  
21  
22  
23  
24  
25  
26  
27  
28  
29  
30  
31  
32  
33  
34  
35  
36  
37  
38  
39  
40  
41  
42  
43  
44  
45  
46  
47  
48  
49  
50  
51  
52  
53  
54  
55  
56  
57  
58  
59  
60

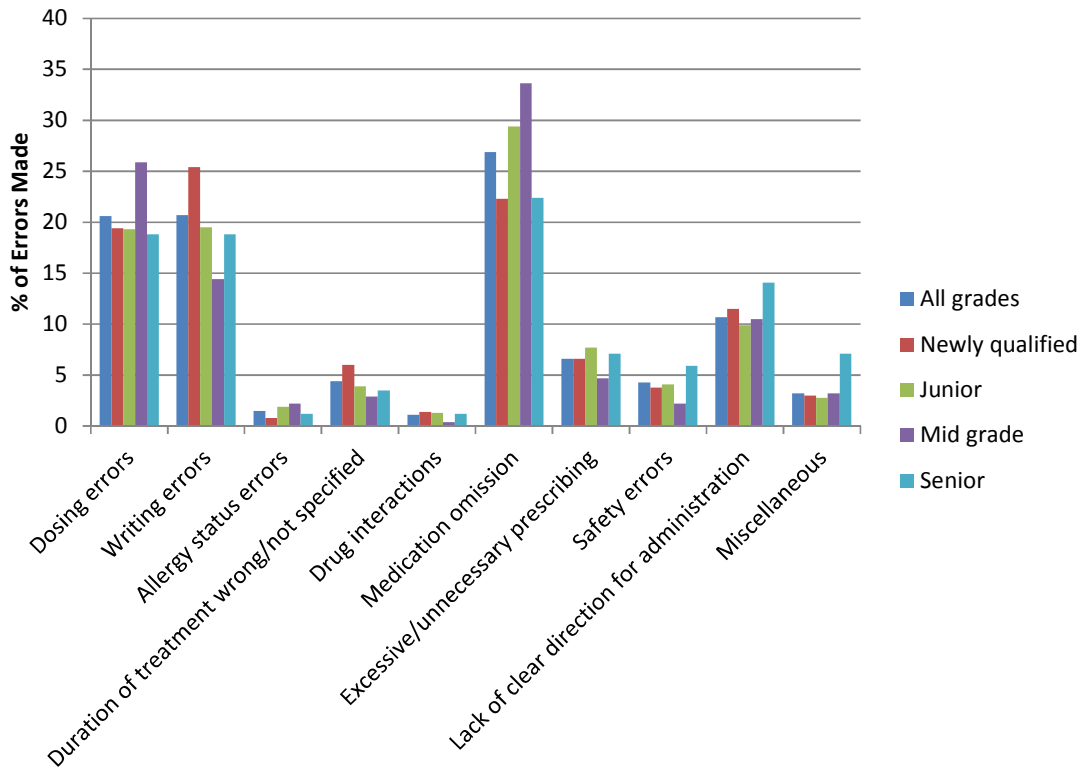

Figure 2. Categories of prescribing errors made by different grades of prescriber

Review only



**Table 1.** Application of error categories and severity ratings for the Mersey Deanery Prescribing Audit

| Modified EQUIP Error Category                 | Original EQUIP Error Category         | Includes/Excludes                                                                                                | Severity (EQUIP)                                                                                                                                                                                                                                                                                                                                                | Severity Modification                                                                                                                                                                                                                |
|-----------------------------------------------|---------------------------------------|------------------------------------------------------------------------------------------------------------------|-----------------------------------------------------------------------------------------------------------------------------------------------------------------------------------------------------------------------------------------------------------------------------------------------------------------------------------------------------------------|--------------------------------------------------------------------------------------------------------------------------------------------------------------------------------------------------------------------------------------|
| 1. Dosing Errors                              | 2. Underdose                          |                                                                                                                  | <b>Minor</b> if unable/unlikely to carry out (units); <b>Significant</b> if dose too low to treat the condition; <b>Serious</b> if patient in acute distress; <b>Pot. Lethal</b> if medication life saving                                                                                                                                                      |                                                                                                                                                                                                                                      |
|                                               | 3. Overdose                           | Excludes overdoses caused by duplication eg. Paracetamol with co-codamol (7)                                     | <b>Minor</b> if unable/unlikely to carry out (units); <b>Significant</b> - low TI, ½-4 times; <b>Serious</b> - Low TI, 4-10 times; errors in units if chance dose could be given; <b>Pot. Lethal</b> if v.low TI and dose 10 times normal dose, results in serum levels of drug in severe toxicity range, or has high potential to cause cardiopulmonary arrest | <b>Minor</b> if effect of dosing expected to be minimal                                                                                                                                                                              |
|                                               | 29. Dose/rate mismatch                |                                                                                                                  | -                                                                                                                                                                                                                                                                                                                                                               | Judgement used based on Equip severity categories                                                                                                                                                                                    |
| 2. Writing Errors                             | 4. Strength/dose missing              | Includes dose units missing                                                                                      | <b>Minor</b>                                                                                                                                                                                                                                                                                                                                                    |                                                                                                                                                                                                                                      |
|                                               | 8. Product/formulation not specified  |                                                                                                                  | -                                                                                                                                                                                                                                                                                                                                                               | <b>Minor</b>                                                                                                                                                                                                                         |
|                                               | 9. Incorrect formulation              |                                                                                                                  | -                                                                                                                                                                                                                                                                                                                                                               | <b>Minor</b> unless formulation likely to have implication on treatment eg. Insulin, co-careldopa, in which case <b>significant/serious</b> based on potential consequence                                                           |
|                                               | 12. No signature                      |                                                                                                                  | -                                                                                                                                                                                                                                                                                                                                                               | <b>Significant</b> (governance issue)                                                                                                                                                                                                |
|                                               | 20. Start date incorrect/missing      |                                                                                                                  | -                                                                                                                                                                                                                                                                                                                                                               | <b>Minor</b>                                                                                                                                                                                                                         |
|                                               | 21. CD requirements incorrect/missing |                                                                                                                  | -                                                                                                                                                                                                                                                                                                                                                               | <b>Minor</b>                                                                                                                                                                                                                         |
| 3. Allergy status missing/significant allergy | 24. Significant allergy               | Includes allergy status not completed, or where a drug has been prescribed despite an allergy to that drug/class | -                                                                                                                                                                                                                                                                                                                                                               | <b>Significant</b> allergy status/specific allergy missed off prescription; <b>Serious</b> if patient prescribed agent allergic to; <b>Pot. Lethal</b> if patient prescribed drug which previously had severe reaction to eg. oedema |

|                                              |                                             |                                                                                                                                                                                     |                                                                                             |                                                                                                                                                                                                                                                                                                                                   |
|----------------------------------------------|---------------------------------------------|-------------------------------------------------------------------------------------------------------------------------------------------------------------------------------------|---------------------------------------------------------------------------------------------|-----------------------------------------------------------------------------------------------------------------------------------------------------------------------------------------------------------------------------------------------------------------------------------------------------------------------------------|
| 4. Duration of treatment wrong/not specified | 18. Continuation for longer than needed     | Includes no stop/review date for antibiotics, steroids etc                                                                                                                          | -                                                                                           | <b>Minor</b> if continuation of the medicine or the duration represents little potential for harm; <b>Significant</b> if continued >3 days longer than needed for medication such as: antibiotics, oral steroids, LMWH, potassium; <b>Serious</b> if ongoing treatment could cause serious harm                                   |
|                                              | 26. Premature discontinuation               | Includes drugs stopped without appropriate reducing course                                                                                                                          | -                                                                                           | <b>Minor</b> if discontinuation is unlikely to have a significant clinical impact; <b>Significant</b> if duration of treatment insufficient to treat condition eg. Antibiotics, or if no reducing course eg. Oral steroids                                                                                                        |
| 5. Drug Interactions                         | 22. Drug interaction                        | Excludes 2 items prescribed from same class e.g omeprazole with lansporazole (7-Duplication)                                                                                        | Serious if drug orders could exacerbate a patient's condition eg. Drug-drug interaction     | <b>Significant</b> if manufacturer advises the combination is contraindicated, should be avoided, or advises caution; <b>Serious</b> if adverse events highly probable                                                                                                                                                            |
|                                              | 27. Drug interaction not taken into account | As above: unable to differentiate 22 and 27 from available data                                                                                                                     |                                                                                             |                                                                                                                                                                                                                                                                                                                                   |
| 6. Omission of medication                    | 1. Omission on admission                    |                                                                                                                                                                                     | <b>Significant</b> (regular medication)                                                     | -                                                                                                                                                                                                                                                                                                                                 |
|                                              | 5. Omission on TTO                          |                                                                                                                                                                                     | <b>Significant</b>                                                                          | -                                                                                                                                                                                                                                                                                                                                 |
|                                              | 17. Drug not prescribed but indicated       |                                                                                                                                                                                     | -                                                                                           | <b>Minor</b> if medication is unlikely to significantly impact patient care; <b>Significant</b> if medication would have significant impact on clinical course <b>Serious</b> if medication would alleviate a serious condition /patient is in acute distress; <b>Potentially lethal</b> if medication is potentially life saving |
| 7. Excessive/unnecessary prescribing         | 7. Duplication                              | Includes a second agent prescribed which contains an ingredient already being taken; 2 drugs prescribed from the same class/with same clinical effect eg. Lansoprazole + omeprazole | <b>Minor</b> if duplicate therapy prescribed without potential for increased adverse events | <b>Significant, Serious, Pot.lethal:</b> As for overdose when duplicated items co-administered (3)                                                                                                                                                                                                                                |
|                                              | 11. Unintentional prescription of           | Drug prescribed was not that desired.                                                                                                                                               |                                                                                             | Judgement used based on Equip                                                                                                                                                                                                                                                                                                     |

|                                                       |                                                    |                                                                                                                     |                                                                                                                                                                                          |                                                                                                                                                                                                                                                                        |
|-------------------------------------------------------|----------------------------------------------------|---------------------------------------------------------------------------------------------------------------------|------------------------------------------------------------------------------------------------------------------------------------------------------------------------------------------|------------------------------------------------------------------------------------------------------------------------------------------------------------------------------------------------------------------------------------------------------------------------|
|                                                       | drug                                               | Includes prescription of a discontinued drug, excluding discontinuation due to ADR (25), or course is too long (18) | -                                                                                                                                                                                        | severity categories                                                                                                                                                                                                                                                    |
| <b>8. Safety Errors</b>                               | 10. No maximum dose                                | Excludes prescriptions with no frequency (6-administration times missing/incorrect)                                 | <b>Minor</b> - order lacked specific drug, dose, strength, frequency or route information                                                                                                | <b>Significant</b> if no maximum dose stated for opioids                                                                                                                                                                                                               |
|                                                       | 13. Clinical contraindication                      | Contraindication according to summary of product characteristics                                                    | <b>Serious</b> if drug orders could exacerbate a patient's condition eg. Drug-disease interaction                                                                                        | <b>Significant</b> if administration unlikely to have serious clinical consequences in the given situation                                                                                                                                                             |
|                                                       | 25. Continuation after ADR                         |                                                                                                                     | -                                                                                                                                                                                        | Judgement used based on Equip severity categories                                                                                                                                                                                                                      |
|                                                       | 28. No dosage alteration after levels out of range |                                                                                                                     | -                                                                                                                                                                                        | Judgement used based on Equip severity categories                                                                                                                                                                                                                      |
| <b>9. Lack of clear directions for administration</b> | 6. Administration times incorrect/missing          | No frequency/times of dosing incorrect eg. In relation to food, morning vs night.                                   | <b>Minor</b>                                                                                                                                                                             | <b>Significant</b> if administration time would be expected to affect treatment eg. Exenatide with meals, hypnotics at night                                                                                                                                           |
|                                                       | 14. Incorrect route                                |                                                                                                                     | <b>Minor</b> if unlikely to be carried out/little chance of toxicity/therapeutic failure; <b>Significant</b> if wrong route to treat condition; <b>Serious</b> if potential for toxicity | -                                                                                                                                                                                                                                                                      |
|                                                       | 16. IV instructions incorrect/missing              |                                                                                                                     | -                                                                                                                                                                                        | Judgement used based on Equip severity categories                                                                                                                                                                                                                      |
|                                                       | 19. Route missing                                  |                                                                                                                     | <b>Minor</b> - order lacked specific drug, dose, strength, frequency or route information                                                                                                | -                                                                                                                                                                                                                                                                      |
|                                                       | 23. Daily dose divided incorrectly                 | Number of dosing intervals incorrect. Excludes under/overdose (2/3)                                                 | -                                                                                                                                                                                        | <b>Minor</b> if dosing intervals are not standard, but are unlikely to significantly affect treatment; <b>Significant</b> if dosing intervals are inappropriate to treat the condition; <b>Serious</b> if medication has narrow therapeutic index and dosing intervals |

1  
2  
3  
4  
5  
6  
7  
8  
9  
10  
11  
12  
13  
14  
15  
16  
17  
18  
19  
20  
21  
22  
23  
24  
25  
26  
27  
28  
29  
30  
31  
32  
33  
34  
35  
36  
37  
38  
39  
40  
41  
42  
43  
44  
45  
46  
47  
48  
49

|                          |                   |                                                                                                                                                                       |   |                                                                                                                                                                            |
|--------------------------|-------------------|-----------------------------------------------------------------------------------------------------------------------------------------------------------------------|---|----------------------------------------------------------------------------------------------------------------------------------------------------------------------------|
|                          |                   |                                                                                                                                                                       |   | may affect toxicity/efficacy eg. Parenteral aminoglycosides                                                                                                                |
| <b>10. Miscellaneous</b> | 15. No indication | Includes PRN medications, where lack of indication on prescription could prevent administration. Excludes failure to write an indication when prescribing antibiotics | - | <b>Minor</b> if indication not written up for PRN medication; <b>Significant</b> if indication not written up for formulations which are licensed for specific conditions. |
|                          | 30. Miscellaneous | Illegible drug details, non-standard abbreviations, patient details incorrect/missing, warfarin fixed dose prescribed.                                                | - | Judgement used based on Equip severity categories                                                                                                                          |

For peer review only

**Table 2.** Summary data showing prevalence and severity of errors observed

|                             |                 | Total Prescriptions | One or more error reported |                        | Error Severity         |                        |                      |                    | Total errors |
|-----------------------------|-----------------|---------------------|----------------------------|------------------------|------------------------|------------------------|----------------------|--------------------|--------------|
|                             |                 |                     | No (%)                     | Yes (%)                | Minor (%)              | Significant (%)        | Serious (%)          | Pot. Lethal (%)    |              |
| <b>All</b>                  |                 | <b>4238</b>         | <b>2381<br/>(56.2)</b>     | <b>1857<br/>(43.8)</b> | <b>1264<br/>(42.0)</b> | <b>1629<br/>(54.1)</b> | <b>109<br/>(3.6)</b> | <b>9<br/>(0.3)</b> | <b>3011</b>  |
| <b>Prescriber Grade</b>     | Newly Qualified | 1805                | 1087<br>(60.2)             | 718<br>(39.8)          | 519<br>(48.8)          | 507<br>(47.7)          | 35<br>(3.3)          | 3<br>(0.3)         | 1064         |
|                             | Junior          | 1484                | 755<br>(50.9)              | 729<br>(49.1)          | 496<br>(39.2)          | 725<br>(57.4)          | 41<br>(3.2)          | 2<br>(0.2)         | 1264         |
|                             | Mid Grade       | 366                 | 190<br>(51.9)              | 176<br>(48.1)          | 93<br>(33.6)           | 166<br>(59.9)          | 15<br>(5.4)          | 3<br>(1.1)         | 277          |
|                             | Senior          | 142                 | 96<br>(67.6)               | 46<br>(32.4)           | 36<br>(42.4)           | 43<br>(50.6)           | 6<br>(7.1)           | 0<br>(0)           | 85           |
|                             | Non-medical     | 35                  | 26<br>(74.3)               | 9<br>(25.7)            | 8<br>(57.1)            | 5<br>(35.7)            | 1<br>(7.1)           | 0<br>(0)           | 14           |
|                             | unknown/other   | 406                 | 227<br>(55.9)              | 179<br>(44.1)          | 112<br>(36.5)          | 183<br>(59.6)          | 11<br>(3.6)          | 1<br>(0.3)         | 307          |
| <b>Training</b>             | Liverpool       | 1290                | 787<br>(61.0)              | 503<br>(39.0)          | 270<br>(35.4)          | 456<br>(59.8)          | 36<br>(4.7)          | 1<br>(0.1)         | 763          |
|                             | Non-Liverpool   | 922                 | 478<br>(51.8)              | 444<br>(48.2)          | 342<br>(43.8)          | 420<br>(53.8)          | 19<br>(2.4)          | 0<br>(0)           | 781          |
|                             | Unknown         | 2026                | 1118<br>(55.2)             | 908<br>(44.8)          | 652<br>(44.4)          | 753<br>(51.3)          | 54<br>(3.7)          | 8<br>(0.5)         | 1467         |
| <b>Admission/ Discharge</b> | Discharge       | 2467                | 1615<br>(65.5)             | 852<br>(34.5)          | 685<br>(52.5)          | 584<br>(44.8)          | 32<br>(2.5)          | 4<br>(0.3)         | 1305         |
|                             | Admission       | 1744                | 756<br>(43.4)              | 988<br>(56.7)          | 576<br>(34.2)          | 1030<br>(61.1)         | 75<br>(4.4)          | 5<br>(0.3)         | 1686         |
|                             | Unknown         | 27                  | 12<br>(44.44)              | 15<br>(55.55)          | 3<br>(15)              | 15<br>(75)             | 2<br>(10)            | 0<br>(0)           | 20           |
| <b>Ward Area</b>            | Medicine        | 2059                | 1083<br>(52.6)             | 976<br>(47.4)          | 634<br>(39.0)          | 921<br>(56.7)          | 64<br>(3.9)          | 6<br>(0.37)        | 1625         |
|                             | Surgery         | 1395                | 836<br>(59.9)              | 559<br>(40.1)          | 448<br>(50.1)          | 417<br>(46.6)          | 27<br>(3.0)          | 2<br>(0.2)         | 894          |

1  
2  
3  
4  
5  
6  
7  
8  
9  
10  
11  
12  
13  
14  
15  
16  
17  
18  
19  
20  
21  
22  
23  
24  
25  
26  
27  
28  
29  
30  
31  
32  
33  
34  
35  
36  
37  
38  
39  
40  
41  
42  
43  
44  
45  
46  
47  
48  
49

|                               |               |     |               |                                               |               |               |             |            |     |
|-------------------------------|---------------|-----|---------------|-----------------------------------------------|---------------|---------------|-------------|------------|-----|
|                               | Mental health | 96  | 66<br>(68.8)  | 30<br>(31.3)                                  | 24<br>(60)    | 16<br>(40)    | 0<br>(0)    | 0<br>(0)   | 40  |
|                               | A&E           | 8   | 1<br>(12.5)   | 7<br>(87.5)                                   | 1<br>(9.1)    | 10<br>90.9    | 0<br>(0)    | 0<br>(0)   | 11  |
|                               | Critical care | 17  | 14<br>(82.4)  | 3<br>(17.7)                                   | 1<br>(25.0)   | 3<br>(75.0)   | 0<br>(0)    | 0<br>(0)   | 4   |
|                               | Unknown       | 663 | 383<br>(57.8) | 280<br>(42.2)                                 | 156<br>(35.7) | 262<br>(60.0) | 18<br>(4.1) | 1<br>(0.2) | 437 |
| <b>Prescription contains#</b> | Antibiotic    | 724 | 301<br>(41.6) | 423 (58.4)<br><b>(Antibiotic: 130 (18.0))</b> | 57<br>(29.8)  | 118<br>(61.8) | 16<br>(8.4) | 0<br>(0)   | 191 |
|                               | Insulin       | 129 | 42<br>(32.6)  | 87 (67.4)<br><b>Insulin: 20 (15.5)</b>        | 12<br>(37.5)  | 19<br>(59.4)  | 1<br>(3.1)  | 0<br>(0)   | 32  |
|                               | Warfarin      | 196 | 71<br>(36.2)  | 125 (63.8)<br><b>Warfarin: 18 (9.2)</b>       | 6<br>(23.1)   | 16<br>(61.5)  | 4<br>(15.4) | 0<br>(0)   | 26  |
|                               | Oxygen        | 36  | 7<br>(19.4)   | 29 (80.6)<br><b>Oxygen: 2 (5.6)</b>           | 1<br>(14.3)   | 5<br>(71.4)   | 1<br>(14.3) | 0<br>(0)   | 7   |

\* Relates to errors per prescriptions written, not errors per number of items prescribed  
 # Error severities, total errors and error rates relate to errors associated with Antibiotics/Insulin/Warfarin/Oxygen only

**Table 3.** Summary of the Errors Observed which were Considered to be Potentially Lethal

| Error Description                                                                                                | Category                                       | Prescriber Grade | Ward Area | Admission/ Discharge |
|------------------------------------------------------------------------------------------------------------------|------------------------------------------------|------------------|-----------|----------------------|
| Gliclazide 400mg prescribed when 40mg needed                                                                     | 1- Dosing Errors                               | Newly qualified  | Medicine  | Discharge            |
| Digoxin 625micrograms prescribed when 62.5micrograms needed                                                      | 1- Dosing Errors                               | Newly qualified  | Medicine  | Discharge            |
| Oxycodone 500mg prescribed: overdose                                                                             | 1- Dosing Errors                               | Mid Grade        | Surgery   | Admission            |
| Methotrexate prescribed daily, not weekly                                                                        | 1- Dosing Errors                               | Junior           | Medicine  | Admission            |
| Doxazocin prescribed; had been stopped by GP due to angioedema                                                   | 3. Allergy status missing/ significant allergy | Junior           | Medicine  | Admission            |
| Phenytoin dose of 300mg daily incorrectly prescribed as 800mg                                                    | 1- Dosing Errors                               | Newly Qualified  | Medicine  | Discharge            |
| Midazolam IV for sedation: overdose                                                                              | 1- Dosing Errors                               | Mid Grade        | Unknown   | Admission            |
| Amiodarone loading dose of 200mg three times daily continued as a regular dose                                   | 1- Dosing Errors                               | Other            | Surgery   | Discharge            |
| Enoxaparin prescribed 1mg/kg once daily instead of 1mg/kg twice daily for a patient with acute coronary syndrome | 1- Dosing Errors                               | Mid Grade        | Medicine  | Admission            |

**Table 4.** Univariate statistics showing the significance of explanatory variables in predicting error rates in prescriptions.

| Variable                                                     | n    | Error<br>n (%)        | No Error<br>n (%)    | Difference (95%CI)       | p-value |
|--------------------------------------------------------------|------|-----------------------|----------------------|--------------------------|---------|
| Prescriber Grade (n=3850)                                    |      | n=1689                | n=2161               |                          |         |
| <i>Newly qualified</i>                                       | 1803 | 716 (42%)             | 1087 (50%)           | -8% (-11.2% to -4.8%)    | <0.001  |
| <i>Junior</i>                                                | 1482 | 727 (43%)             | 755 (35%)            | 8% (4.9% to 11.1%)       |         |
| <i>Mid-grade</i>                                             | 366  | 176 (10%)             | 190 (8.8%)           | 1.2% (-0.7% to 3.1%)     |         |
| <i>Senior</i>                                                | 142  | 46 (2.7%)             | 96 (4.4%)            | -1.7% (-2.8% to -0.4%)   |         |
| <i>Non-medical</i>                                           | 35   | 9 (0.5%)              | 26 (1.2%)            | -0.7% (-1.3% to -0.1%)   |         |
| <i>Other</i>                                                 | 22   | 15 (0.9%)             | 7 (0.3%)             | 0.56% (0.1% to 1.1%)     |         |
| TTO/Admission (n=3065)                                       |      | n=1135                | n=1930               |                          |         |
| TTO                                                          | 2467 | 853 (75%)             | 1614 (84%)           | -9% (-12.0% to -6.0%)    | <0.001  |
| Admission                                                    | 598  | 282 (25%)             | 316 (16%)            |                          |         |
| Liverpool trained (n=1325)                                   |      | n=518                 | n=807                |                          |         |
| <i>Liverpool</i>                                             | 35   | 14 (2.7%)             | 21 (2.6%)            | 0.1% (-1.7% to 1.9%)     | 0.911   |
| <i>Non-Liverpool</i>                                         | 1290 | 504 (97%)             | 786 (97%)            |                          |         |
| Hospital (n=4238)                                            |      | n=1857                | n=2381               |                          |         |
| <i>Hospital A</i>                                            | 762  | 366 (20%)             | 396 (17%)            | 3% (0.6% to 5.4%)        | <0.001  |
| <i>Hospital B</i>                                            | 513  | 239 (12%)             | 274 (12%)            | 0% (-2.0% to 2.0%)       |         |
| <i>Hospital C</i>                                            | 500  | 296 (16%)             | 204 (8.6%)           | 7.4% (5.4% to 9.4%)      |         |
| <i>Hospital D</i>                                            | 97   | 30 (1.6%)             | 67 (2.8%)            | -1.2% (-2.1% to -0.3%)   |         |
| <i>Hospital E</i>                                            | 371  | 160 (8.6%)            | 211 (8.9%)           | -0.3% (-2.0% to 1.4%)    |         |
| <i>Hospital F</i>                                            | 604  | 355 (19%)             | 249 (10%)            | 9% (6.8% to 11.2%)       |         |
| <i>Hospital G</i>                                            | 86   | 22 (1.2%)             | 64 (2.7%)            | -1.5% (-2.3% to -0.7%)   |         |
| <i>Hospital H</i>                                            | 807  | 290 (16%)             | 517 (22%)            | -6% (-8.4% to -3.6%)     |         |
| <i>Hospital I</i>                                            | 498  | 99 (5.3%)             | 399 (17%)            | -11.7% (-13.5% to -9.9%) |         |
| Ward Area (n=3575)                                           |      | n=1577                | n=1998               |                          |         |
| <i>Medical</i>                                               | 2059 | 977 (62%)             | 1082 (54%)           | 8% (4.8% to 11.2%)       | <0.001  |
| <i>Surgical</i>                                              | 1395 | 560 (36%)             | 835 (42%)            | -6% (-9.2% to -2.8%)     |         |
| <i>A &amp; E</i>                                             | 8    | 7 (0.4%)              | 1 (0.1%)             | 0.3% (-0.04% to 0.6%)    |         |
| <i>Mental health</i>                                         | 96   | 30 (1.9%)             | 66 (3.3%)            | -1.4% (-2.4% to -0.4%)   |         |
| <i>Critical care</i>                                         | 17   | 3 (0.2%)              | 14 (0.7%)            | -0.5% (-0.9% to -0.1%)   |         |
| Number of Medicines on Prescription (n=3386)<br>Median (IQR) |      | 8; (4,11)<br>(n=1435) | 4; (2,7)<br>(n=1951) | -4 (-4.5, -3.5)          | <0.001  |



**Table 5.** Multivariate logistic regression analysis for predicting error rates in prescriptions.

| Variable                          | Odds ratio (95%CI)  | p-value |
|-----------------------------------|---------------------|---------|
| <b>Hospital</b>                   |                     |         |
| <i>Hospital H</i>                 | 1                   |         |
| <i>Hospital A</i>                 | Not estimable*      |         |
| <i>Hospital B</i>                 | 1.11 (0.78 to 1.58) | 0.57    |
| <i>Hospital C</i>                 | 2.38 (1.63 to 3.46) | <0.001  |
| <i>Hospital D</i>                 | 0.64 (0.13 to 3.06) | 0.57    |
| <i>Hospital E</i>                 | 1.39 (0.96 to 2.01) | 0.08    |
| <i>Hospital F</i>                 | 3.53 (2.63 to 4.73) | <0.001  |
| <i>Hospital G</i>                 | 1.80 (1.03 to 3.12) | 0.04    |
| <i>Hospital I</i>                 | 1.11 (0.73 to 1.70) | 0.62    |
| <b>Prescriber Grade</b>           |                     |         |
| <i>Newly qualified</i>            | 1                   |         |
| <i>Junior</i>                     | 1.06 (0.85 to 1.32) | 0.61    |
| <i>Mid-grade</i>                  | 0.96 (0.64 to 1.44) | 0.83    |
| <i>Senior</i>                     | 0.97 (0.58 to 1.63) | 0.92    |
| <i>Non-medical</i>                | 0.59 (0.21 to 1.64) | 0.31    |
| <i>Other</i>                      | 1.50 (0.53 to 4.23) | 0.44    |
| <b>Discharge/Admission</b>        | 1.16 (0.70 to 1.92) | 0.58    |
| <b>Number of prescribed items</b> | 1.14 (1.12 to 1.17) | <0.001  |

Analysis contains only 2127 records (50.2%) where complete data was provided for all variables

\* Trust provided no data on number of prescription items

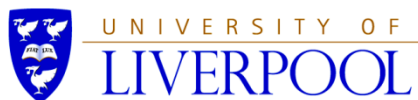

1  
2  
3  
4  
5  
6  
7 TO: Editor  
8 BMJ Open

Professor S H Khoo, MD, FRCP, DTM&H  
Department of Pharmacology & Therapeutics

Pharmacology Research Laboratories  
Block H, First Floor  
70 Pembroke Place  
Liverpool  
L69 3GF

T 0151 794 5560  
F 0151 794 5656  
E khoo@liverpool.ac.uk

31st August 2012.

9  
10  
11  
12  
13  
14  
15  
16  
17  
18  
19  
20  
21 Dear Editor

22  
23 **Re: Cross Sectional Study of Prescribing Error in Patients Admitted to Nine Hospitals Across North**  
24 **West England**  
25

26  
27 Please find enclosed our manuscript for your consideration. The BMJ Group Journals have a long and  
28 honourable tradition of championing patient safety, and publishing research which seeks to  
29 characterise, understand and limit harms resulting from medication error. Earlier this year, Ingrid  
30 Torjesen's article highlighted findings from two of the UK's largest studies into prescribing error in  
31 primary and secondary care (the PRACTiCe and EQUIP studies respectively) [Torjesen *I. BMJ* 2 May  
32 2012]. Both studies have released study reports on the GMC website, but neither has yet been  
33 published in a peer-reviewed journal.  
34

35  
36 Our sample size is comparable to EQUIP, and larger than PRACTiCe, and our observed error rate of  
37 ~10% of medication items prescribed is similar to EQUIP (9%) and PRACTiCe (4%), using a modified  
38 version of EQUIP definitions. By analysing error within complete individual prescriptions (rather than  
39 individual medication items) we show that a significant proportion of patients were exposed to  
40 prescribing error, and that this risk increased by 14% for every medication item added to their  
41 prescription. Risk of error did not vary with hospital, seniority of prescriber or medical school  
42 training, but acute medical admission scenarios were associated with highest risk of error (mainly  
43 arising from unintended medication omission). Finally, electronic prescribing and medication  
44 administration systems could only have prevented up to a quarter of these errors, highlighting the  
45 important role of the ward pharmacist, particularly in high-pressure acute areas.  
46  
47

48  
49 We believe these results are likely to accurately reflect the prevalence of prescribing error more  
50 generally throughout the UK, and to consequently inform health policy which seeks to minimise  
51 patient harms through improvements in health systems. Thank you for considering this for  
52 publication in BMJ Open.  
53

54  
55 With best wishes,

56  
57 A handwritten signature in blue ink, appearing to be 'S.H. Khoo'.

58  
59 Professor S.H. Khoo  
60 Institute of Translational Medicine  
University of Liverpool

STROBE Statement—Checklist of items that should be included in reports of *cross-sectional studies*

|                              | Item No | Recommendation                                                                                                                                                                                               |     |
|------------------------------|---------|--------------------------------------------------------------------------------------------------------------------------------------------------------------------------------------------------------------|-----|
| <b>Title and abstract</b>    | 1       | (a) Indicate the study's design with a commonly used term in the title or the abstract                                                                                                                       | √   |
|                              |         | (b) Provide in the abstract an informative and balanced summary of what was done and what was found                                                                                                          | √   |
| <b>Introduction</b>          |         |                                                                                                                                                                                                              |     |
| Background/rationale         | 2       | Explain the scientific background and rationale for the investigation being reported                                                                                                                         | √   |
| Objectives                   | 3       | State specific objectives, including any prespecified hypotheses                                                                                                                                             | √   |
| <b>Methods</b>               |         |                                                                                                                                                                                                              |     |
| Study design                 | 4       | Present key elements of study design early in the paper                                                                                                                                                      | √   |
| Setting                      | 5       | Describe the setting, locations, and relevant dates, including periods of recruitment, exposure, follow-up, and data collection                                                                              | √   |
| Participants                 | 6       | (a) Give the eligibility criteria, and the sources and methods of selection of participants                                                                                                                  | √   |
| Variables                    | 7       | Clearly define all outcomes, exposures, predictors, potential confounders, and effect modifiers. Give diagnostic criteria, if applicable                                                                     | √   |
| Data sources/<br>measurement | 8*      | For each variable of interest, give sources of data and details of methods of assessment (measurement). Describe comparability of assessment methods if there is more than one group                         | √   |
| Bias                         | 9       | Describe any efforts to address potential sources of bias                                                                                                                                                    | √   |
| Study size                   | 10      | Explain how the study size was arrived at                                                                                                                                                                    | √   |
| Quantitative variables       | 11      | Explain how quantitative variables were handled in the analyses. If applicable, describe which groupings were chosen and why                                                                                 | √   |
| Statistical methods          | 12      | (a) Describe all statistical methods, including those used to control for confounding                                                                                                                        | √   |
|                              |         | (b) Describe any methods used to examine subgroups and interactions                                                                                                                                          | √   |
|                              |         | (c) Explain how missing data were addressed                                                                                                                                                                  | √   |
|                              |         | (d) If applicable, describe analytical methods taking account of sampling strategy                                                                                                                           | √   |
|                              |         | (e) Describe any sensitivity analyses                                                                                                                                                                        | √   |
| <b>Results</b>               |         |                                                                                                                                                                                                              |     |
| Participants                 | 13*     | (a) Report numbers of individuals at each stage of study—eg numbers potentially eligible, examined for eligibility, confirmed eligible, included in the study, completing follow-up, and analysed            | n/a |
|                              |         | (b) Give reasons for non-participation at each stage                                                                                                                                                         | n/a |
|                              |         | (c) Consider use of a flow diagram                                                                                                                                                                           | n/a |
| Descriptive data             | 14*     | (a) Give characteristics of study participants (eg demographic, clinical, social) and information on exposures and potential confounders                                                                     | √   |
|                              |         | (b) Indicate number of participants with missing data for each variable of interest                                                                                                                          | √   |
| Outcome data                 | 15*     | Report numbers of outcome events or summary measures                                                                                                                                                         | √   |
| Main results                 | 16      | (a) Give unadjusted estimates and, if applicable, confounder-adjusted estimates and their precision (eg, 95% confidence interval). Make clear which confounders were adjusted for and why they were included | √   |

|                          |    |                                                                                                                                                                            |   |
|--------------------------|----|----------------------------------------------------------------------------------------------------------------------------------------------------------------------------|---|
|                          |    | (b) Report category boundaries when continuous variables were categorized                                                                                                  | √ |
|                          |    | (c) If relevant, consider translating estimates of relative risk into absolute risk for a meaningful time period                                                           | √ |
| Other analyses           | 17 | Report other analyses done—eg analyses of subgroups and interactions, and sensitivity analyses                                                                             | √ |
| <b>Discussion</b>        |    |                                                                                                                                                                            |   |
| Key results              | 18 | Summarise key results with reference to study objectives                                                                                                                   | √ |
| Limitations              | 19 | Discuss limitations of the study, taking into account sources of potential bias or imprecision. Discuss both direction and magnitude of any potential bias                 | √ |
| Interpretation           | 20 | Give a cautious overall interpretation of results considering objectives, limitations, multiplicity of analyses, results from similar studies, and other relevant evidence | √ |
| Generalisability         | 21 | Discuss the generalisability (external validity) of the study results                                                                                                      | √ |
| <b>Other information</b> |    |                                                                                                                                                                            |   |
| Funding                  | 22 | Give the source of funding and the role of the funders for the present study and, if applicable, for the original study on which the present article is based              | √ |

\*Give information separately for exposed and unexposed groups.

**Note:** An Explanation and Elaboration article discusses each checklist item and gives methodological background and published examples of transparent reporting. The STROBE checklist is best used in conjunction with this article (freely available on the Web sites of PLoS Medicine at <http://www.plosmedicine.org/>, Annals of Internal Medicine at <http://www.annals.org/>, and Epidemiology at <http://www.epidem.com/>). Information on the STROBE Initiative is available at [www.strobe-statement.org](http://www.strobe-statement.org).

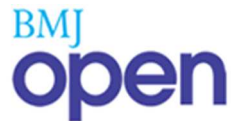

## Cross Sectional Study of Prescribing Errors in Patients Admitted to Nine Hospitals Across North West England

|                                 |                                                                                                                                                                                                                                                                                                                                                                                                                                                                                                                                                                                                                                                                                                                                                                                                                                                                                                                                                                                                                                                                                                                                                                                                                                                                                                  |
|---------------------------------|--------------------------------------------------------------------------------------------------------------------------------------------------------------------------------------------------------------------------------------------------------------------------------------------------------------------------------------------------------------------------------------------------------------------------------------------------------------------------------------------------------------------------------------------------------------------------------------------------------------------------------------------------------------------------------------------------------------------------------------------------------------------------------------------------------------------------------------------------------------------------------------------------------------------------------------------------------------------------------------------------------------------------------------------------------------------------------------------------------------------------------------------------------------------------------------------------------------------------------------------------------------------------------------------------|
| Journal:                        | <i>BMJ Open</i>                                                                                                                                                                                                                                                                                                                                                                                                                                                                                                                                                                                                                                                                                                                                                                                                                                                                                                                                                                                                                                                                                                                                                                                                                                                                                  |
| Manuscript ID:                  | bmjopen-2012-002036.R1                                                                                                                                                                                                                                                                                                                                                                                                                                                                                                                                                                                                                                                                                                                                                                                                                                                                                                                                                                                                                                                                                                                                                                                                                                                                           |
| Article Type:                   | Research                                                                                                                                                                                                                                                                                                                                                                                                                                                                                                                                                                                                                                                                                                                                                                                                                                                                                                                                                                                                                                                                                                                                                                                                                                                                                         |
| Date Submitted by the Author:   | 23-Oct-2012                                                                                                                                                                                                                                                                                                                                                                                                                                                                                                                                                                                                                                                                                                                                                                                                                                                                                                                                                                                                                                                                                                                                                                                                                                                                                      |
| Complete List of Authors:       | Seden, Kay; University of Liverpool, Faculty of Health & Life Sciences; Royal Liverpool and Broadgreen University Hospital Trust, NIHR Biomedical Research Centre<br>Kirkham, Jamie; University of Liverpool, Department of Biostatistics<br>Kennedy, Tom; University of Liverpool, Faculty of Health & Life Sciences<br>Lloyd, Michael; Whiston Hospital- St Helens and Knowsley Teaching Hospitals NHS Trust, Pharmacy Department<br>James, Sally; Royal Liverpool and Broadgreen University Hospitals NHS Trust, Pharmacy Department<br>McManus, Aine; Royal Liverpool and Broadgreen University Hospitals NHS Trust, Pharmacy Department<br>Ritchings, Andrew; Mid Cheshire Hospitals NHS Foundation Trust, Pharmacy Department<br>Simpson, Jennifer; Warrington and Halton Hospitals NHS Foundation Trust, Pharmacy Department<br>Thornton, Dave; Aintree University Hospitals NHS Foundation Trust, Pharmacy Department<br>Gill, Andrea; Alder Hey Children's Hospital NHS Foundation Trust, Pharmacy Department<br>Coleman, Carolyn; Nobles Hospital, Douglas, Isle of Man, Pharmacy Department<br>Thorpe, Bethan; Cheshire and Wirral Partnership NHS Foundation Trust, Pharmacy Department<br>Khoo, Saye; University of Liverpool, Faculty of Health & Life Sciences; Univ of Liverpool |
| <b>Primary Subject Heading</b>: | Health services research                                                                                                                                                                                                                                                                                                                                                                                                                                                                                                                                                                                                                                                                                                                                                                                                                                                                                                                                                                                                                                                                                                                                                                                                                                                                         |
| Secondary Subject Heading:      | Health services research                                                                                                                                                                                                                                                                                                                                                                                                                                                                                                                                                                                                                                                                                                                                                                                                                                                                                                                                                                                                                                                                                                                                                                                                                                                                         |
| Keywords:                       | EDUCATION & TRAINING (see Medical Education & Training), Quality in health care < HEALTH SERVICES ADMINISTRATION & MANAGEMENT, Risk management < HEALTH SERVICES ADMINISTRATION & MANAGEMENT                                                                                                                                                                                                                                                                                                                                                                                                                                                                                                                                                                                                                                                                                                                                                                                                                                                                                                                                                                                                                                                                                                     |
|                                 |                                                                                                                                                                                                                                                                                                                                                                                                                                                                                                                                                                                                                                                                                                                                                                                                                                                                                                                                                                                                                                                                                                                                                                                                                                                                                                  |

1  
2  
3  
4 **Cross Sectional Study of Prescribing Errors in Patients Admitted to Nine Hospitals**  
5 **Across North West England**  
6  
7

8  
9 Seden K<sup>1,2</sup>, Kirkham JJ<sup>3</sup>, Kennedy T<sup>2</sup>, Lloyd M<sup>4</sup>, James S<sup>5</sup>, Mcmanus A<sup>5</sup>, Ritchings A<sup>6</sup>,  
10 Simpson J<sup>7</sup>, Thornton D<sup>8</sup>, Gill A<sup>9</sup>, Coleman C<sup>10</sup>, Thorpe B<sup>11</sup>, Khoo SH<sup>1,2</sup>  
11

12  
13  
14 NIHR Biomedical Research Centre, Royal Liverpool and Broadgreen University Hospital  
15 Trust, Liverpool, UK<sup>1</sup>; Faculty of Health & Life Sciences, University of Liverpool, Liverpool,  
16 UK<sup>2</sup>; Department of Biostatistics, University of Liverpool, Liverpool, UK<sup>3</sup>; Pharmacy  
17 Department, Whiston Hospital- St Helens and Knowsley Teaching Hospitals NHS Trust,  
18 Whiston, UK<sup>4</sup>; Pharmacy Department, Royal Liverpool and Broadgreen University Hospitals  
19 NHS Trust, Liverpool, UK<sup>5</sup>; Pharmacy Department, Mid Cheshire Hospitals NHS Foundation  
20 Trust, Cheshire, UK<sup>6</sup>; Pharmacy Department, Warrington and Halton Hospitals NHS  
21 Foundation Trust, Warrington, UK<sup>7</sup>; Pharmacy Department, Aintree University Hospitals  
22 NHS Foundation Trust, Liverpool, UK<sup>8</sup>; Pharmacy Department, Alder Hey Children's Hospital  
23 NHS Foundation Trust, Liverpool, UK<sup>9</sup>; Pharmacy Department, Nobles Hospital, Douglas,  
24 Isle of Man, UK<sup>10</sup>; Pharmacy Department, Cheshire and Wirral Partnership NHS Foundation  
25 Trust, Wirral, UK<sup>11</sup>  
26  
27  
28  
29  
30  
31

32 Corresponding Author: Saye Khoo  
33 Pharmacology Research Laboratories  
34 H Block, 1<sup>st</sup> Floor  
35 70 Pembroke Place  
36 Liverpool  
37 L69 3GF, UK  
38 [Khoo@liv.ac.uk](mailto:Khoo@liv.ac.uk)  
39  
40  
41  
42  
43  
44  
45  
46  
47  
48  
49  
50  
51  
52  
53  
54  
55  
56  
57  
58  
59  
60

## Article Summary

### 1. Article Focus

- Some studies have reported lower error rates with more senior prescriber grades, and insufficient undergraduate prescriber training as a potential risk for prescribing errors
- Prescriptions frequently contain multiple medications, but data about errors on complete prescriptions (all prescribed items on an inpatient chart or discharge prescription), which give a better estimate of numbers of patients at risk of harm, are lacking
- We aimed to determine the differences in prescribing error rates between grades of prescriber, ward area, admission or discharge and type of medication prescribed

### 2. Key Messages

- We observed an error rate of 10.9% per prescribed item, with only 56.2% of 4238 complete prescriptions remaining error free.
- In multivariate analysis, the strongest predictor for prescribing error was the number of medicines on each prescription.
- We found no overall difference in error rate amongst different grades of prescriber, and newly qualified doctors were not more likely to make errors than their senior colleagues.

### 3. Strengths and Limitations

- This was a large study across nine diverse hospital settings
- We determined the rate of errors on complete prescriptions as well as for individually prescribed items, giving a better estimate of the numbers of patients affected by errors.
- We did not evaluate the impact of electronic prescribing on the prevalence and type of prescribing errors, however up to a quarter of the errors observed could potentially have been avoided through use of electronic prescribing and medicines administration systems

**Abstract**

**Objective** To evaluate the prevalence, type and severity of prescribing errors observed between grades of prescriber, ward area, admission or discharge and type of medication prescribed

**Design** Ward-based clinical pharmacists prospectively documented prescribing errors at the point of clinically checking admission or discharge prescriptions. Error categories and severities were assigned at the point of data collection, and verified independently by the study team

**Setting** Prospective study of nine diverse National Health Service (NHS) hospitals in North West England, including teaching hospitals, district hospitals and specialist services for paediatrics, women and mental health.

**Results** Of 4238 prescriptions evaluated, one or more error was observed in 1857 (43.8%) prescriptions, with a total of 3011 errors observed. Of these, 1264 (41.9%) were minor, 1629 (54.1%) were significant, 109 (3.6%) were serious and 9 (0.30%) were potentially life-threatening. The majority of errors considered to be potentially lethal (n=9) were dosing errors (n=8), mostly relating to overdose (n=7). The rate of error was not significantly different between newly qualified doctors compared with junior, middle grade or senior doctors. Multivariable analyses revealed the strongest predictor of error was the number of items on a prescription (risk of error increased 14% for each additional item). We observed a high rate of error from medication omission, particularly amongst patients admitted acutely into hospital. Electronic prescribing systems could potentially have prevented up to a quarter of (but not all) errors.

**Conclusions** In contrast to other studies, prescriber experience did not impact on overall error rate (although there were qualitative differences in error category). Given that multiple drug therapies are now the norm for many medical conditions, health systems should introduce and retain safeguards which detect and prevent error, in addition to continuing training and education, and migration to electronic prescribing systems.



## Introduction

Prescribing errors are common, with systematic reviews suggesting that as many as 50% of hospital admissions and 7% of medication orders are affected.<sup>1</sup> In recent studies, prescribing errors have been found to affect approximately 9-15% of medication orders for hospital inpatients in the United Kingdom (UK).<sup>2,3</sup> Over one third of 651 patients were found to have a prescribing error occurring at hospital admission in the United States (US).<sup>4</sup> Prescribing errors are also prevalent in primary care, affecting 37% of 9385 prescriptions in the US,<sup>5</sup> and one in eight patients (one in 20 prescription items) in the UK.<sup>6</sup> A study in the Netherlands evaluating medication omission errors in elderly patients admitted to hospital reported adverse consequences in 21% of 100 patients.<sup>8</sup>

Human error in healthcare may be considered in the context of individuals or health systems.<sup>9-11</sup> While personal factors such as forgetfulness, inattention, poor motivation, carelessness, negligence, and recklessness are important, a health systems approach more comprehensively addresses recurrent errors and organisation factors and processes which may give rise to that error. The person, the team, the task, the workplace and the institution as a whole are considered,<sup>9</sup> which identify weaknesses in the system's defences.<sup>9</sup> For example, higher hospital mortality at weekends may be associated with lower numbers of senior staff available outside of the normal working week.<sup>12,13</sup>

Data on factors which may contribute to prescribing errors, for example differences between grades of prescriber, ward area, admission or discharge and type of medication prescribed are sparse.<sup>3,14,15</sup> Existing data suggest that newly qualified and junior doctors are twice as likely to make prescribing errors than senior doctors, taking into account the larger volume of prescriptions written by more junior prescriber grades.<sup>3</sup> Provision of sufficient undergraduate training to allow medical students to become safe prescribers when they begin work as newly qualified doctors is widely recognised as an important factor in reducing prescribing errors.<sup>14,16-18</sup> Teaching in UK medical schools has changed considerably over the last decade, with the General Medical Council stipulating that medical students must be adequately prepared to prescribe drugs and manage risk at the point of graduation.<sup>19,20</sup>

Whilst previous studies have evaluated error for individual medications, few studies have systematically evaluated complete prescriptions (all items included on a single prescription chart or discharge prescription at the time of clinical pharmacist check) to evaluate factors associated with prescribing error.<sup>1-3</sup> This is important as it gives a more accurate estimate of the numbers of patients who are potentially put at risk of harm by prescribing errors. We undertook a prospective survey of prescribing errors in nine diverse National Health Service (NHS) hospitals in the North West of England, aiming to examine the differences in prescribing error rates between grades of prescriber, ward area, admission or discharge, hospitals and the type and number of medication prescribed. In order to further evaluate the role of undergraduate training, we also tested for a relationship between occurrence of error and medical school training of prescribers. Univariate analysis and multivariate logistic regression was used to evaluate factors associated with prescribing errors.

## Methods

### Setting

A total of nine NHS hospitals from the Merseyside and Cheshire region took part in the audit. These comprised large teaching hospitals, general hospitals, specialist centres for

1  
2  
3 paediatrics, women's health and mental health (Table 1). One hospital was using complete  
4 electronic prescribing systems (inpatient prescribing, medication ordering, discharge  
5 prescriptions) on some wards at the time of the audit. Eight of the hospitals were using paper  
6 prescription charts for inpatients and either handwritten or transcribed electronically  
7 generated discharge prescriptions. In this setting, ward-based clinical pharmacists check  
8 inpatient prescriptions at or soon after patient admission, when medicines reconciliation is  
9 undertaken. Inpatient prescription charts are then checked at least daily by the pharmacist.  
10 Discharge prescriptions are checked and authorised by a clinical pharmacist prior to supply  
11 of medication. Pharmacists may amend or clarify some aspects of prescribing, or discuss  
12 with the clinical team any recommendations or safety issues at these points of care. Clinical  
13 pharmacists may also participate in ward rounds and multidisciplinary team meetings, where  
14 prescribing may be discussed with clinicians, clarified or amended.  
15  
16

### 17 18 **Data Collection**

19 As this was an audit of unlinked anonymised prescriptions, Ethics approval was not required  
20 in accordance with local guidance. We aimed to capture data from all seven hospital trusts in  
21 the region. Two additional hospitals adjacent to and linked with healthcare provision in the  
22 Merseyside region were also audited. The number of prescriptions audited was empirically  
23 determined in order to generate a sample size equivalent to a large study recently  
24 undertaken in the UK.<sup>3</sup> In order to audit practice across the region, each hospital was asked  
25 to audit a minimum of 400 prescriptions.  
26  
27

28  
29 We adopted the following definition of prescribing errors for the study, which excludes  
30 adherence to local prescribing policy and guidelines: "A clinically meaningful prescribing  
31 error occurs when, as a result of a prescribing decision or prescription writing process, there  
32 is an unintentional significant (1) reduction in the probability of treatment being timely and  
33 effective or (2) increase in the risk of harm when compared with generally accepted  
34 practice".<sup>21</sup> A standard questionnaire collected data on error category and severity (based on  
35 EQUIP error classifications). The EQUIP study was a large prospective survey of prescribing  
36 errors affecting hospital inpatients in the UK,<sup>3</sup> and the error classifications were therefore  
37 considered relevant to our setting. Nominated ward-based clinical pharmacists prospectively  
38 documented prescribing errors at the point of checking inpatient or discharge prescriptions,  
39 during normal pharmacy working hours, therefore each audit form was a point prevalence of  
40 prescribing errors at the time of pharmacist clinical check. Acute admission was defined as  
41 the first 24 hours in hospital. For all prescription sheets generated in acute admission  
42 settings, a separate audit form was completed (to allow for emergency prescribing in the  
43 absence of a full drug history without this being recorded as an error) and we sought to  
44 record only unintended medication omissions (e.g. following medicines reconciliation with  
45 general practices or primary healthcare databases). Hospitals were advised to complete the  
46 study on different days of the week throughout the period of the audit, in order to capture an  
47 even spread of days. For example data collection would occur weekly, on Monday in week  
48 one, Tuesday in week two, Wednesday in week three, in order to minimise double auditing  
49 of the same patient on admission to hospital and subsequent admission to a ward.  
50 Therefore, if patients were audited twice, an interval of at least one week would separate  
51 each audit form, unless their acute admission/inpatient /discharge prescription were audited  
52 on the same day. If items on prescriptions had been previously screened, they would be  
53 counted again in any subsequent auditing, though there would be a one week interval since  
54 previous auditing, or the patient would be a different stage of hospital admission. All types of  
55 inpatient medication order were audited, including IV fluids, when required and once only  
56 medication.  
57  
58

### 59 **Prescriber Category**

1  
2  
3 Pharmacists were required to indicate the category of prescribers on data collection forms.  
4 For this analysis, prescribers were categorised as follows: newly qualified (foundation year 1,  
5 house officers), junior (foundation year 2, specialist or 'core' training years 1 & 2), mid grade  
6 (specialist registrars, training fellows), senior (consultant), non-medical (nurse or pharmacist  
7 prescribers), other (for example locum doctors for whom grade was unclear ) and unknown  
8 (no information concerning prescriber recorded).  
9

### 10 11 **Grading of prescribing errors**

12 We modified EQUIP study criteria<sup>3</sup> for error categorisation and severity classification by  
13 adding or clarifying severity criteria for all error categories, and by grouping errors into ten  
14 distinct areas according to stage of the prescribing process (see below and Table 2).  
15 'Exclusion' and 'inclusion' of errors into EQUIP study error types were defined, in order to  
16 differentiate categories with potential overlap. Severity ratings were further defined and  
17 assigned to each error category based on modified EQUIP study criteria and taking into  
18 account the perceptions of the original pharmacist gradings. Severity ratings related to the  
19 potential severity had the error been allowed to progress through to the patient, as the  
20 majority of errors were corrected prior to the point of administration. In order to limit  
21 misclassification error, the original 29 EQUIP categories were batched into 10 different types  
22 of error groups as follows: (1) Dosing errors, (2) Writing errors, (3) Allergy status errors, (4)  
23 Duration of treatment wrong/not specified, (5) Drug interactions, (6) Omission of medication,  
24 (7) Excessive/unnecessary prescribing, (8) Safety errors, (9) Lack of clear directions for  
25 administration, (10) a new error category (Miscellaneous) was added (Table 2 ). The  
26 modification and definition of error categories and severities was undertaken by two  
27 members of the study team (KS, SK) and agreed by a third (TK).  
28  
29  
30  
31

32 Despite using a standard set of definitions, we noted discrepancies across various hospitals  
33 in both error categorisation and severity rating. In particular there was a tendency to over-  
34 report errors and to overestimate their potential severity. This was confirmed by a *post-hoc*  
35 inter-rater agreement analysis. A set of six sample prescriptions was generated. A list of 14  
36 sample errors was decided by the study team, including study error type and severity,  
37 according to the criteria in Table 2 utilised for analysis of the main study. The errors selected  
38 occurred frequently in the main study, and covered a broad range of error categories and  
39 severities. Six pharmacists from each participating hospital were asked to each screen the  
40 six prescription scenarios containing the 14 errors and to record any observed errors,  
41 allocating error types and severities. The exact agreement percentages between category  
42 classification, severity classification and both combined were computed to measure the  
43 absolute concordances between pharmacist scores against the gold standard assessment.  
44  
45  
46

47 In order to limit inter-observer bias, all grading and severity of errors identified in the main  
48 study were independently reassessed by two members of the study team (KS and SK), with  
49 discordant assessments collectively discussed with a third (TK) in order to agree a final  
50 categorisation for error type and severity. For severity ratings, the summary of product  
51 characteristics for relevant medication was consulted, in order to determine potential  
52 implications of different degrees of overdose, underdose, of drug interactions, and also to  
53 confirm clinical contra-indications.  
54  
55

### 56 **Statistical Analyses**

57  
58 Data were analysed at the prescription level using complete case data. The prevalence and  
59 severity of errors observed were tabulated using percentage frequencies. A Forest plot  
60 was produced to present the error prevalence rate and 95% confidence interval (95% CI) for

1  
2  
3 each hospital and grade of prescriber. For the formal statistical analysis, when there was  
4 more than one error on a prescription, only the most severe error was included. This  
5 approach was used to ensure that the errors included in the analysis were independent. In  
6 this study, we assessed hospital, prescriber grade (newly qualified, junior, mid-grade, senior,  
7 non-medical, other), ward area (medical, surgical, A&E, mental health, critical care), number  
8 of prescribed medicines, an indicator to denote whether the prescription was prescribed on  
9 admission or on discharge and an indicator to denote whether the prescriber was Liverpool  
10 trained or not as potential risk factors. Univariate statistical analyses were performed using a  
11 chi-squared test except for continuous data, which were analysed using the Mann-Whitney U  
12 test. A multivariate logistic regression model for a prescription error was fitted to the data.  
13 Results are given in terms of an odds ratio (OR) and associated 95% CI. All risk factors that  
14 were statistically significant ( $p < 0.1$ ) in the univariate analysis were considered for inclusion in  
15 the multivariate model with the exception of ward area as a number of hospitals only  
16 reported a single specialty type.

17  
18 All statistical analysis was carried out using the statistical software package SPSS (version  
19 20) using a two-sided significance level of 0.05 (5%) throughout.  
20  
21  
22  
23  
24  
25  
26  
27  
28  
29  
30  
31  
32  
33  
34  
35  
36  
37  
38  
39  
40  
41  
42  
43  
44  
45  
46  
47  
48  
49  
50  
51  
52  
53  
54  
55  
56  
57  
58  
59  
60

## Results

### *Error Classification*

During the *post-hoc* inter-rater agreement analysis, approximately 75% of error categories were correctly identified by pharmacists when compared to the standards. Only 47% of severity ratings were concordant with the standards, and 40% of pharmacists rated both error category and severity in concordance with the standards.

Re-assessment of errors by the study team resulted in exclusion of a total of 143 errors which were not considered true errors of the process of prescribing. The error category was re-graded for 434 errors, and severity was re-graded for 724 errors, which was predominantly a down-grading.

### *Descriptive data and severity of errors*

A total of 4238 prescriptions were evaluated; of these, 1857 (43.8%) prescriptions contained at least one error (Table 3). The overall prevalence of prescribing errors (number of prescriptions with one or more error/prescriptions evaluated) ranged from 20% to 60% across the nine hospitals (Figure 1). The rate of errors per prescribed item was 10.9%.

A total of 3011 individual errors were observed within the 1857 prescriptions containing an error. Of these 3011 errors, 1264 (41.9%) were minor, 1629 (54.1%) were significant, 109 (3.6%) were serious and nine (0.30%) were potentially life-threatening (Table 3). Details of all potentially life-threatening errors are listed in Table 3 and mainly comprised dosing errors (n=8), particularly overdose (n=7), with one incidence of under dose. A further error considered to be potentially lethal related to prescription of a medicine to which the patient had previously had a serious allergic reaction.

The proportion of errors categorised with severity as significant or higher by prescriber grade were as follows: all prescribers 58.0%, newly qualified 51.2%, junior 60.8%, mid grade 66.4%, senior 57.6% ( $\chi^2_{\text{trend}} p < 0.001$  for univariate analysis, although this association disappeared when corrected for other potential confounders)(Table 3).

Fewer errors were observed on discharge prescriptions than on prescriptions written on admission. More errors were observed in prescriptions containing antibiotics, insulin, warfarin and oxygen, although this does not take into account the number of items on each prescription. Whether doctors were Liverpool trained or not did not affect the number of errors observed (Table 3).

Differences in error prevalence and error types were observed in individual participating hospitals. The lowest rates of errors were reported for the paediatrics specialty, with 0.07 errors observed per prescribed item, and 0.26 errors observed per prescription. However, in multivariate analysis, there was no significant reduction in error risk and it is likely that the effect could be due to lower number of items per prescription (mean 3.5, vs pooled data: 6.3). The most common error types were dosing errors (30%) and medication omission (23.1%).

Significantly lower risk of errors was observed in the hospital providing specialist services for women ( $p = 0.04$ , Table 6) in multivariate analysis. One of the lowest error rates per prescription was observed (0.28), although the error rate per prescribed item (0.11) was

1  
2  
3 equal to that of the pooled data. The most common error type observed was  
4 excessive/unnecessary prescribing (50%). No errors of medication omission were observed.  
5 This hospital also had a low number of items per prescription (2.4), and was using electronic  
6 prescribing systems on some wards.  
7  
8

### 9 10 *Error types*

11  
12 The most frequent error types for all prescribers were medication omission, accounting for  
13 26.9%, writing errors accounting for (20.7%) and dosing errors accounting for (20.6%) of all  
14 errors recorded. There was little difference in the variability of error types across different  
15 prescriber grades (Figure 2).  
16  
17

### 18 19 *Risk factor analysis*

20  
21 Results of the univariate analysis are shown in Table 5. Missing data limited inclusion of all  
22 reported prescriptions in risk factor analysis, notably as one acute hospital failed to return  
23 data on number of items on each prescription. All factors considered appeared to show a  
24 significant difference except for medical school training of doctors, which made no significant  
25 difference ( $p=0.91$ ) to whether an error occurred on the prescription. Multivariate risk factor  
26 analysis showed that the likelihood of an error increased for every additional item included  
27 on the prescription (OR 1.14, 95% C 1.12, 1.17,  $p<0.001$ ) (Table 5). Therefore, for each  
28 additional item on the prescription, the risk of an error occurring increased by about 14%.  
29 There was also a trend towards errors being more likely to occur on admission prescriptions  
30 than on discharge prescriptions, with an odds ratio (OR) of 1.16 (95% CI 0.70, 1.92,  $p=0.58$ ),  
31 although this difference did not reach statistical significance (Table 6). No significant  
32 differences were found in error rates between different prescriber grades, when compared to  
33 newly qualified doctors (Figure 2, Figure 3) in multivariate analyses.  
34  
35  
36  
37  
38  
39

### 40 **Discussion**

41  
42 In this large study, only 56.2% of 4238 prescriptions written had no reported errors. Of the  
43 errors recorded, 41.9% were minor, 54.1% significant, 3.6% serious and 0.3% potentially life  
44 threatening. It is important to note that severity ratings relate to the potential severity had  
45 the error been allowed to progress through to the patient - in fact the majority of errors were  
46 corrected prior to the point of administration. In multivariate analysis, the strongest predictor  
47 for prescribing error was the number of medicines on each prescription, with risk for  
48 prescribing error increasing by 14% for every additional medication item prescribed. Where  
49 data were available, prescriptions contained an average of 6.3 medication items, although  
50 this varied from 2.4 – 7.5 items according to medical specialty surveyed. Uncorrected  
51 analyses suggested that errors were frequent in prescriptions containing insulin (15.5%),  
52 antibiotics (18%), warfarin (9.2%) and oxygen (5.6%), although these patients were very  
53 likely to have been receiving multiple medications. Error rates were highest amongst  
54 specialties which prescribed a broad range of medications (e.g. acute medicine, compared  
55 to elective surgery), and also differed between different hospital Trusts, with hospitals  
56 specialising in paediatrics, maternal health and mental health exhibiting the lowest error  
57  
58  
59  
60

1  
2  
3 rates. However, when corrected for number of medications, these differences did not remain  
4 significant, with the exception of maternal health.  
5

6  
7 The most frequent error encountered was unintended medication omission following acute  
8 hospital admission (0.97 errors/prescription written, versus 0.53 for discharge medications).  
9 When adjusted in multivariable analyses (Table 6) there was no statistically significant  
10 difference in error rates between admission and discharge. We found no overall difference in  
11 error rate amongst different grades of prescriber, and newly qualified doctors were not more  
12 likely to make errors than their senior colleagues. Although numbers were relatively small,  
13 we observed no difference in error rate amongst newly qualified doctors by undergraduate  
14 training, and doctors trained in Liverpool were neither more nor less likely to commit  
15 medication errors. The categories and severity of errors made by different prescriber grades  
16 were broadly similar (Table 3, Figure 2), however some differences were observed. For  
17 example, writing errors were more frequently observed with newly qualified doctors,  
18 medication omission was more frequently observed with junior and mid grade doctors, and  
19 dosing errors were more frequently observed with mid grade doctors.  
20  
21

22  
23 These results are consistent with previously published studies. Both the EQUIP and  
24 PRACTiCe Studies<sup>3 6</sup> reported error rates of approximately 1 in 10 medications prescribed  
25 (we observed a rate of 10.9%). Given the high number of medications prescribed (mean of  
26 6.3 items/prescription) nearly half of all prescriptions contained at least one error.  
27

28 A systematic review found prescribing errors to be more common in adults than in children.<sup>1</sup>  
29 A study in Spain comparing paediatric wards with obstetrics found that paediatric patients  
30 had a fourfold higher risk of serious errors than the maternity population (2.3% vs 14.3%),  
31 which were mainly related to drug dosing.<sup>22</sup> This is in keeping with our data, as we  
32 observed a low error rate for the paediatrics specialty, although this was likely due to a low  
33 number of prescribed items. Dosing errors were the most common error type. Another study  
34 reported that prescribing errors were more common in primary care amongst men compared  
35 to women.<sup>6</sup> We observed a significantly lower risk for errors in specialist services for women.  
36

37  
38 In the EQUIP study, multivariate analysis showed that all grades of doctors were more likely  
39 to write a prescription containing an error than consultants.<sup>3</sup> A retrospective study which  
40 evaluated errors on discharge prescriptions found no significant difference in error rates  
41 between prescriber grades, although no senior (consultant) level prescribers were  
42 included.<sup>15</sup> In primary care, the grade of general practitioner was not associated with  
43 prescribing errors.<sup>6</sup> We observed no significant difference in prescribing error rates between  
44 prescriber grades, when compared to newly qualified prescribers. EQUIP also reported that  
45 medication orders issued at acute admission were 70% more likely to be associated with a  
46 prescribing error.<sup>3</sup> Another study found lower error rates on discharge prescription items  
47 than was observed with general inpatient prescribing, due to a lower rate of medication  
48 omission, however these factors were not corrected for the number of items on each  
49 prescription.<sup>2</sup> We observed a trend towards errors being more likely to occur on admission  
50 prescriptions than on discharge prescriptions, with an odds ratio (OR) of 1.16, although this  
51 did not reach significance in multivariate analysis.  
52  
53  
54

55  
56 Our study was limited by missing data (one acute hospital failed to return data on number of  
57 items on each prescription), and although pharmacists had received some basic training in  
58 completing the evaluations, post-hoc analyses suggested significant variability between  
59 pharmacists' classification of errors, and especially in assignment of severity classification.  
60 Two of us independently revised each prescribing error and noted a tendency to over-

1  
2  
3 estimate the severity of errors, and (in keeping with EQUIP criteria) included in our  
4 evaluations an assessment of whether or not a wrong dose was likely to have been actually  
5 administered based on tablet burden. We also refined EQUIP criteria to assign severity  
6 ratings to error categories where these had previously not been provided. Finally, by  
7 grouping errors into categories according to their origin, we sought to reduce  
8 misclassification as far as possible. Since our data collection forms did not allow us to  
9 evaluate errors which had been missed, it is possible that our observed error rates may  
10 represent an under-estimate of the true burden of prescribing error.  
11  
12

13 Medication omission was the most prevalent error, representing 26.9% of all errors  
14 observed, which is consistent with previous reports.<sup>2 15</sup> Prescribing during acute admission  
15 in the absence of a full medication history may sometimes be unavoidable, and does not  
16 necessarily constitute an error. For this reason we discriminated between 'emergency'  
17 prescribing, and errors where a more complete or accurate medication history would have  
18 prevented omission of prescribed medications. Although we sought to capture only  
19 unintended medication omission, it is possible that there might still have been cases where  
20 the omission was intentional (for example, suspension of diuretics in a patient who was  
21 hypotensive or dehydrated on admission) but this intent had been missed by the pharmacist  
22 collecting the data. A sensitivity analysis showed that if all errors of medication omission  
23 either on discharge or admission were excluded, the number of errors totals 2249 (0.53 per  
24 prescription written); with 1471 (34.7%) prescriptions containing at least one error,  
25 which represents a significant reduction in overall prescribing error rate. A core role for  
26 clinical ward based pharmacists is medicines reconciliation for admitted patients. This  
27 involves detailed medication history taking, recording of full medication list in the patient's  
28 case notes, and discussion with the clinical team to ensure that all regular medicines are  
29 prescribed throughout the admission, if appropriate. Similarly, on discharge, pharmacists  
30 ensure that necessary regular medicines are continued, and that any medicines newly  
31 started during the admission are prescribed for discharge as appropriate. The majority of the  
32 omission errors reported will have been rectified during admission or prior to discharge, as a  
33 result of the pharmacist clinical check. This highlights the importance of medicines  
34 reconciliation as soon as practicable at hospital admission, in order to minimise the  
35 possibility of missed doses of essential medicines. The role of pharmacists in acute  
36 admission settings may therefore be of particular benefit.  
37  
38  
39  
40  
41  
42

43 EQUIP error categories which could potentially be eliminated by introduction of electronic  
44 prescribing (strength/dose missing, product/formulation not specified, no signature, start date  
45 incorrect/missing, incorrect route, IV instructions incorrect/missing) accounted for 357  
46 (11.9%) of the 3011 errors observed. A further 376 (12.5%) errors could be reduced by  
47 electronic prescribing, via alerts, cautions and required fields at the patient entry/prescribing  
48 stage, although many of these can be over-ridden by the prescriber.<sup>23</sup> These include:  
49 administration times missing/incorrect, duplication, CD requirements incorrect/missing. The  
50 extent to which electronic prescribing can eliminate particular error types depends on the  
51 individual systems used. Importantly, whilst electronic prescribing systems could potentially  
52 have prevented up to a quarter of errors, these systems are best utilised alongside rather  
53 than instead of existing safeguards. We did not formally evaluate differences in error rates  
54 between electronic prescribing and paper-based prescribing systems. Although one hospital  
55 (Hospital G) was utilising complete electronic prescribing systems on some wards at the time  
56 of the study, and many of the other hospitals were using electronically generated discharge  
57 summaries, we failed to observe any clear association with error rate, mainly because of the  
58 large variability in case mix which impacted directly on the number of items/prescription. In  
59  
60



1  
2  
3 contrast, EQUIP reported that electronic prescriptions were 12% less likely to be associated  
4 with a prescribing error than handwritten prescriptions.<sup>3</sup> Although electronic discharge  
5 summaries may reduce error due to legibility, they do not eliminate the transcription step  
6 from inpatient charts. One study which analysed 1808 handwritten and electronic discharge  
7 summaries found no difference in the number or types of errors observed.<sup>15</sup> It is also worth  
8 noting that electronic systems, while clearly offering an advantage over conventional  
9 medicines management and prescribing systems, have themselves been associated with  
10 new patterns of error. Studies in the UK and Australia found a significant reduction in  
11 prescribing errors detected after introduction of electronic prescribing systems, but also  
12 identified errors specific to the electronic prescribing system used, for example, incorrect  
13 product selected from drop-down menu, or incorrect dosing frequency selected.<sup>24-26</sup> These  
14 electronic systems will doubtless continue to improve through refinement.<sup>23 27</sup>

15  
16  
17  
18 The Erice Medication Errors Research Group (EMERGE) recommendations for reducing  
19 prescribing errors, includes training and assessment of prescribers, ongoing monitoring,  
20 awareness and communication.<sup>14</sup> Health systems which may impact on likelihood of error  
21 occurring include European harmonisation of prescribing, introduction of integrated  
22 prescription forms, use of IT systems such as electronic prescribing, and standardisation,  
23 evaluation, and certification of such systems. Involvement of clinical pharmacists at all points  
24 of the medication process is also recommended.<sup>14</sup> The latter is important since all the  
25 hospital Trusts in our survey had evolved systems to safeguard patients from prescribing  
26 error (regardless of the adoption of electronic prescribing), and this involved use of ward-  
27 based pharmacists and dispensary staff to perform routine checks on all prescriptions issued  
28 <sup>3 10 22 28</sup>. This likely represents the 'last line of defence' against prescribing error, and has  
29 greatest utility when deployed in clinical areas associated with highest risk. One fundamental  
30 role of clinical pharmacists during acute admission is medicines reconciliation, where a  
31 patient's full medication history is determined and recorded using all available sources of  
32 information. Our findings suggest that removing this safeguard (e.g. through service  
33 reconfiguration or in an effort to reduce costs) could potentially lead to higher numbers of  
34 medication error actually reaching the patient.  
35  
36  
37  
38  
39  
40  
41  
42  
43  
44  
45  
46  
47  
48  
49  
50  
51  
52  
53  
54  
55  
56  
57  
58  
59  
60

### **Acknowledgements**

We gratefully acknowledge the contributions of pharmacists who participated in this study. This work was funded through an unrestricted educational grant from Mersey Deanery, although design, execution, analysis and reporting was carried out independently by the study team.

We thank Professor David Graham, Postgraduate Medical Dean, Mersey Deanery for supporting the project

We thank the National Institute of Health Research (NIHR Department of Health) and the Northwest Development Agency (NWDA) for infrastructural and project support.

### **Declaration**

All authors have completed the Unified Competing Interest form and declare that (1) SK has received research funding for website development from Merck, Bristol Myers Squibb, Gilead, ViiV, Tibotec, and Abbott, and honoraria, travel support for conference attendance from Roche, Tibotec, and Viiv in the past 3 years. All other authors have nothing to declare

TK and SHK developed the study concept, ML, SJ, AMc, AR, JS, AG, CC, BT co-ordinated data collection, KS, SHK analysed the data, JJK undertook the main statistical analysis with tabulations produced by KS. KS, SHK prepared the manuscript. JJK was involved in substantial revisions of the manuscript. TK, ML, SJ, AMc, AR, JS, AG, CC, BT reviewed the manuscript, SHK is the guarantor for the project.

All authors, external and internal, had full access to all of the data (including statistical reports and tables) in the study and can take responsibility for the integrity of the data and the accuracy of the data analysis

Data sharing: all requests for data sharing to Professor SH Khoo (khoo@liv.ac.uk)

The Corresponding Author has the right to grant on behalf of all authors and does grant on behalf of all authors, an exclusive licence (or non exclusive for government employees) on a worldwide basis to the BMJ Publishing Group Ltd to permit this article (if accepted) to be published in BMJ editions and any other BMJ PGL products and sublicences such use and exploit all subsidiary rights, as set out in our licence

## References

1. Lewis PJ, Dornan T, Taylor D, Tully MP, Wass V, Ashcroft DM. Prevalence, incidence and nature of prescribing errors in hospital inpatients: a systematic review. *Drug Saf* 2009;32(5):379-89.
  2. Franklin BD, Reynolds M, Shebl NA, Burnett S, Jacklin A. Prescribing errors in hospital inpatients: a three-centre study of their prevalence, types and causes. *Postgrad Med J* 2011;87(1033):739-45.
  3. EQUIP final report. [http://www.gmc-uk.org/FINAL\\_Report\\_prevalence\\_and\\_causes\\_of\\_prescribing\\_errors.pdf](http://www.gmc-uk.org/FINAL_Report_prevalence_and_causes_of_prescribing_errors.pdf) 28935150.pdf
  4. Gleason KM, McDaniel MR, Feinglass J, Baker DW, Lindquist L, Liss D, et al. Results of the Medications at Transitions and Clinical Handoffs (MATCH) study: an analysis of medication reconciliation errors and risk factors at hospital admission. *J Gen Intern Med* 2010;25(5):441-7.
  5. Abramson EL, Bates DW, Jenter C, Volk LA, Barron Y, Quaresimo J, et al. Ambulatory prescribing errors among community-based providers in two states. *J Am Med Inform Assoc* 2011.
  6. The PRACTiCe Study (PRevalence And Causes of prescribing errors in general practiCe) A report for the GMC May 2012 [http://www.gmc-uk.org/Investigating\\_the\\_prevalence\\_and\\_causes\\_of\\_prescribing\\_errors\\_in\\_general\\_practice\\_The\\_PRACTiCe\\_study\\_Report\\_May\\_2012\\_48605085.pdf](http://www.gmc-uk.org/Investigating_the_prevalence_and_causes_of_prescribing_errors_in_general_practice_The_PRACTiCe_study_Report_May_2012_48605085.pdf)
  7. Davies EC, Green CF, Taylor S, Williamson PR, Mottram DR, Pirmohamed M. Adverse drug reactions in hospital in-patients: a prospective analysis of 3695 patient-episodes. *PLoS One* 2009;4(2):e4439.
  8. Drenth-van Maanen AC, Spee J, van Hensbergen L, Jansen PA, Egberts TC, van Marum RJ. Structured history taking of medication use reveals iatrogenic harm due to discrepancies in medication histories in hospital and pharmacy records. *J Am Geriatr Soc* 2011;59(10):1976-7.
  9. Reason J. Human error: models and management. *BMJ* 2000;320(7237):768-70.
  10. Dean B, Schachter M, Vincent C, Barber N. Causes of prescribing errors in hospital inpatients: a prospective study. *Lancet* 2002;359(9315):1373-8.
  11. Barber N, Rawlins M, Dean Franklin B. Reducing prescribing error: competence, control, and culture. *Qual Saf Health Care* 2003;12 Suppl 1:i29-32.
  12. Inside your Hospital: Dr. Foster Hospital Guide 2001-2011. Dr Foster Intelligence/Department of Health L, UK. Available from URL: [http://drfosterintelligence.co.uk/wp-content/uploads/2011/11/Hospital\\_Guide\\_2011.pdf](http://drfosterintelligence.co.uk/wp-content/uploads/2011/11/Hospital_Guide_2011.pdf), date last accessed 13/3/12.
  13. Hospital Patients 'More Likely to Die at Weekends' BBC News, London. Available from URL: <http://www.bbc.co.uk/news/health-15895663>, date last accessed 13/3/12.
  14. Agrawal A, Aronson JK, Britten N, Ferner RE, de Smet PA, Fialova D, et al. Medication errors: problems and recommendations from a consensus meeting. *Br J Clin Pharmacol* 2009;67(6):592-8.
  15. Callen J, McIntosh J, Li J. Accuracy of medication documentation in hospital discharge summaries: A retrospective analysis of medication transcription errors in manual and electronic discharge summaries. *Int J Med Inform* 2010;79(1):58-64.
  16. Likic R, Maxwell SR. Prevention of medication errors: teaching and training. *Br J Clin Pharmacol* 2009;67(6):656-61.
  17. Harding S, Britten N, Bristow D. The performance of junior doctors in applying clinical pharmacology knowledge and prescribing skills to standardized clinical cases. *Br J Clin Pharmacol* 2010;69(6):598-606.
  18. Goldacre MJ, Taylor K, Lambert TW. Views of junior doctors about whether their medical school prepared them well for work: questionnaire surveys. *BMC Med Educ* 2010;10:78.
  19. Tomorrow's Doctors, General medical Council, London, UK. February 2003. Available from URL: [http://www.gmc-uk.org/static/documents/content/TomorrowsDoctors\\_2003.pdf](http://www.gmc-uk.org/static/documents/content/TomorrowsDoctors_2003.pdf).
  20. Tomorrow's Doctors. General Medical Council, London UK. September 2009. Available from URL: [http://www.gmc-uk.org/static/documents/content/TomorrowsDoctors\\_2009.pdf](http://www.gmc-uk.org/static/documents/content/TomorrowsDoctors_2009.pdf)
- For peer review only - <http://bmjopen.bmj.com/site/about/guidelines.xhtml>

- 1
- 2
- 3 21. Dean B, Barber N, Schachter M. What is a prescribing error? *Qual Health Care* 2000;9(4):232-7.
- 4 22. Fernandez-Llamazares CM, Calleja-Hernandez MA, Manrique-Rodriguez S, Perez-Sanz C, Duran-
- 5 Garcia E, Sanjurjo-Saez M. Prescribing errors intercepted by clinical pharmacists in
- 6 paediatrics and obstetrics in a tertiary hospital in Spain. *Eur J Clin Pharmacol* 2012.
- 7 23. Scott GP, Shah P, Wyatt JC, Makubate B, Cross FW. Making electronic prescribing alerts more
- 8 effective: scenario-based experimental study in junior doctors. *J Am Med Inform Assoc*
- 9 2011;18(6):789-98.
- 10 24. Donyai P, O'Grady K, Jacklin A, Barber N, Franklin BD. The effects of electronic prescribing on the
- 11 quality of prescribing. *Br J Clin Pharmacol* 2008;65(2):230-7.
- 12 25. Westbrook JI, Reckmann M, Li L, Runciman WB, Burke R, Lo C, et al. Effects of two commercial
- 13 electronic prescribing systems on prescribing error rates in hospital in-patients: a before and
- 14 after study. *PLoS Med* 2012;9(1):e1001164.
- 15 26. Jani YH, Barber N, Wong IC. Republished error management: Paediatric dosing errors before and
- 16 after electronic prescribing. *Postgrad Med J* 2011;87(1030):565-8.
- 17 27. Nanji KC, Rothschild JM, Salzberg C, Keohane CA, Zigmont K, Devita J, et al. Errors associated with
- 18 outpatient computerized prescribing systems. *J Am Med Inform Assoc* 2011;18(6):767-73.
- 19 28. Klopotoska JE, Kuiper R, van Kan HJ, de Pont AC, Dijkgraaf MG, Lie AHL, et al. On-ward
- 20 participation of a hospital pharmacist in a Dutch intensive care unit reduces prescribing
- 21 errors and related patient harm: an intervention study. *Crit Care* 2010;14(5):R174.
- 22
- 23
- 24
- 25
- 26
- 27
- 28
- 29
- 30
- 31
- 32
- 33
- 34
- 35
- 36
- 37
- 38
- 39
- 40
- 41
- 42
- 43
- 44
- 45
- 46
- 47
- 48
- 49
- 50
- 51
- 52
- 53
- 54
- 55
- 56
- 57
- 58
- 59
- 60

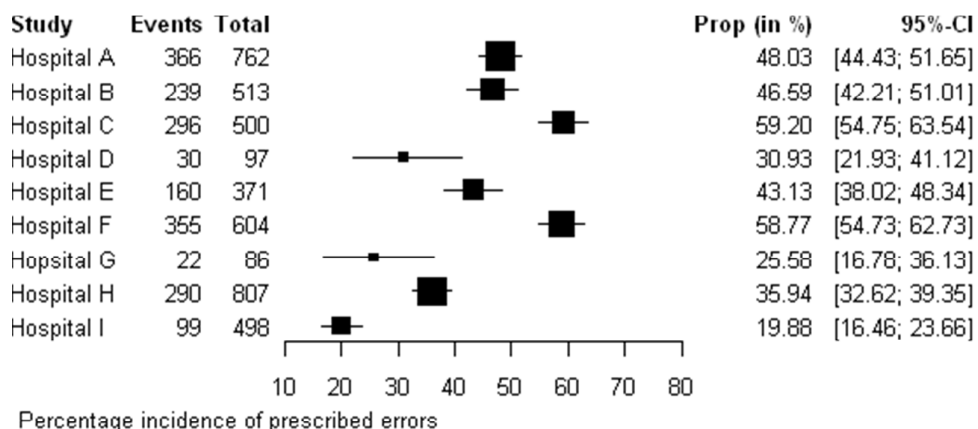

**Figure 1a.** Forest plot showing prescribing error rates in nine hospitals across North West England.

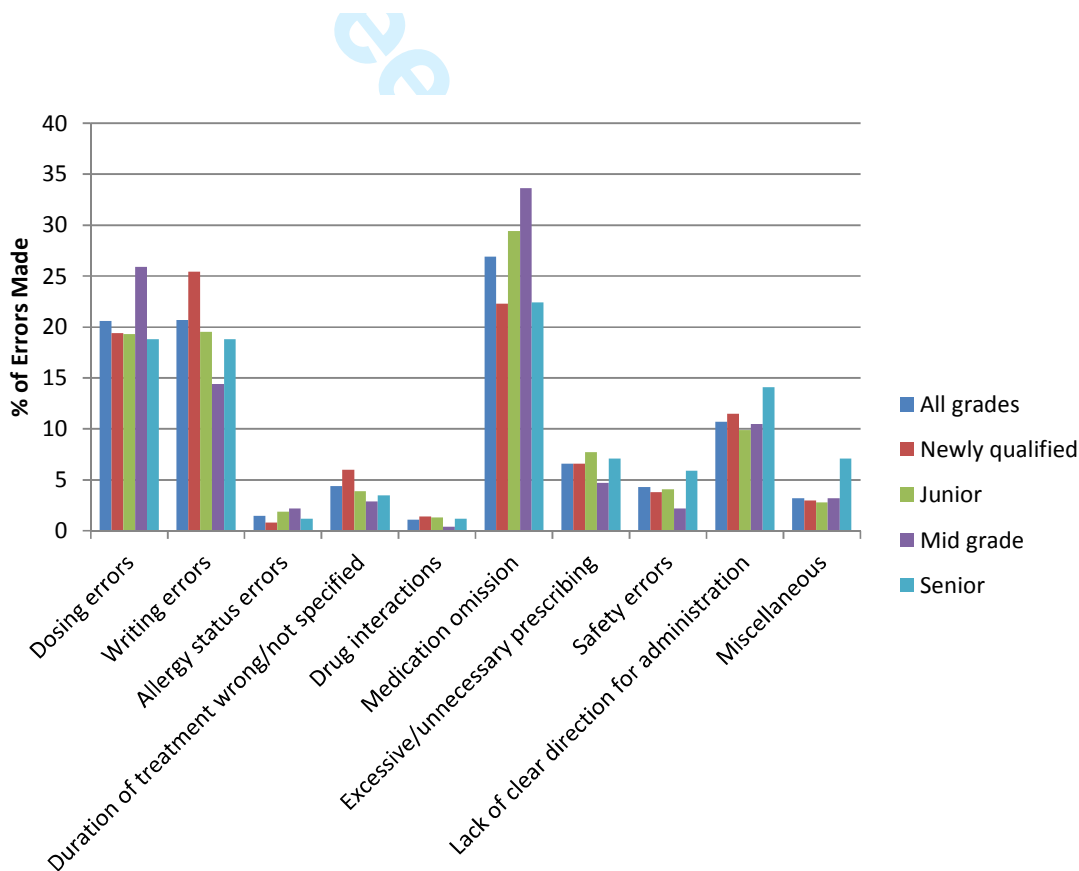

**Figure 2.** Categories of prescribing errors made by different grades of prescriber

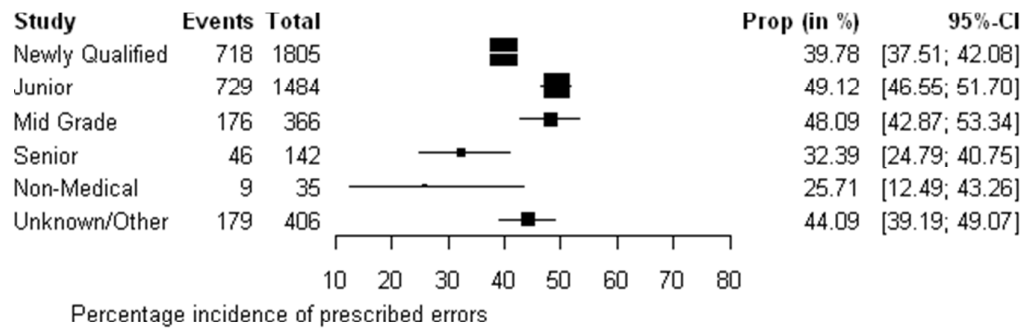

**Figure 31b.** Forest plot showing prescribing error rates made by different prescriber grades

| Teaching Hospitals | District Hospitals | Specialist Hospitals<br>(Women, Paediatrics,<br>Mental Health) |
|--------------------|--------------------|----------------------------------------------------------------|
| Hospital A         | Hospital B         | Hospital D                                                     |
| Hospital C         | Hospital E         | Hospital G                                                     |
| Hospital H         | Hospital F         | Hospital I                                                     |

For peer review only

Table 12. Application of error categories and severity ratings for the Mersey Deanery Prescribing Audit

| Modified EQUIP Error Category                 | Original EQUIP Error Category     | Includes/Excludes                                                                                                | Severity (EQUIP)                                                                                                                                                                                                                                                                                                                                                       | Severity Modification                                                                                                                                                                                                |
|-----------------------------------------------|-----------------------------------|------------------------------------------------------------------------------------------------------------------|------------------------------------------------------------------------------------------------------------------------------------------------------------------------------------------------------------------------------------------------------------------------------------------------------------------------------------------------------------------------|----------------------------------------------------------------------------------------------------------------------------------------------------------------------------------------------------------------------|
| 1. Dosing Errors                              | Underdose                         |                                                                                                                  | <b>Minor</b> if unable/unlikely to carry out (units); <b>Significant</b> if dose too low to treat the condition; <b>Serious</b> if patient in acute distress; <b>Potentially Lethal</b> if medication life saving                                                                                                                                                      |                                                                                                                                                                                                                      |
|                                               | Overdose                          | Excludes overdoses caused by duplication eg. Paracetamol with co-codamol                                         | <b>Minor</b> if unable/unlikely to carry out (units); <b>Significant</b> - low TI, ½-4 times; <b>Serious</b> - Low TI, 4-10 times; errors in units if chance dose could be given; <b>Potentially Lethal</b> if v.low TI and dose 10 times normal dose, results in serum levels of drug in severe toxicity range, or has high potential to cause cardiopulmonary arrest | <b>Minor</b> if effect of dosing expected to be minimal                                                                                                                                                              |
|                                               | Dose/rate mismatch                |                                                                                                                  | -                                                                                                                                                                                                                                                                                                                                                                      | Judgement used based on Equip severity categories                                                                                                                                                                    |
| 2. Writing Errors                             | Strength/dose missing             | Includes dose units missing                                                                                      | <b>Minor</b>                                                                                                                                                                                                                                                                                                                                                           |                                                                                                                                                                                                                      |
|                                               | Product/formulation not specified |                                                                                                                  | -                                                                                                                                                                                                                                                                                                                                                                      | <b>Minor</b>                                                                                                                                                                                                         |
|                                               | Incorrect formulation             |                                                                                                                  | -                                                                                                                                                                                                                                                                                                                                                                      | <b>Minor</b> unless formulation likely to have implication on treatment eg. Insulin, co-careldopa, in which case <b>significant/serious</b> based on potential consequence                                           |
|                                               | No signature                      |                                                                                                                  | -                                                                                                                                                                                                                                                                                                                                                                      | <b>Significant</b> (governance issue)                                                                                                                                                                                |
|                                               | Start date incorrect/missing      |                                                                                                                  | -                                                                                                                                                                                                                                                                                                                                                                      | <b>Minor</b>                                                                                                                                                                                                         |
|                                               | CD requirements incorrect/missing |                                                                                                                  | -                                                                                                                                                                                                                                                                                                                                                                      | <b>Minor</b>                                                                                                                                                                                                         |
| 3. Allergy status missing/significant allergy | Significant allergy               | Includes allergy status not completed, or where a drug has been prescribed despite an allergy to that drug/class | -                                                                                                                                                                                                                                                                                                                                                                      | <b>Significant</b> allergy status/specific allergy missed off prescription; <b>Serious</b> if patient prescribed agent allergic to; <b>Potentially Lethal</b> if patient prescribed drug which previously had severe |



1  
2  
3  
4  
5  
6  
7  
8  
9  
10  
11  
12  
13  
14  
15  
16  
17  
18  
19  
20  
21  
22  
23  
24  
25  
26  
27  
28  
29  
30  
31  
32  
33  
34  
35  
36  
37  
38  
39  
40  
41  
42  
43  
44  
45  
46  
47  
48  
49

|                                                     |                                         |                                                                                                                                                |                                                                                                |                                                                                                                                                                                                                                                                                                                                   |
|-----------------------------------------------------|-----------------------------------------|------------------------------------------------------------------------------------------------------------------------------------------------|------------------------------------------------------------------------------------------------|-----------------------------------------------------------------------------------------------------------------------------------------------------------------------------------------------------------------------------------------------------------------------------------------------------------------------------------|
|                                                     |                                         |                                                                                                                                                |                                                                                                | reaction to eg. oedema                                                                                                                                                                                                                                                                                                            |
| <b>4. Duration of treatment wrong/not specified</b> | Continuation for longer than needed     | Includes no stop/review date for antibiotics, steroids etc                                                                                     | -                                                                                              | <b>Minor</b> if continuation of the medicine or the duration represents little potential for harm; <b>Significant</b> if continued >3 days longer than needed for medication such as: antibiotics, oral steroids, LMWH, potassium; <b>Serious</b> if ongoing treatment could cause serious harm                                   |
|                                                     | Premature discontinuation               | Includes drugs stopped without appropriate reducing course                                                                                     | -                                                                                              | <b>Minor</b> if discontinuation is unlikely to have a significant clinical impact; <b>Significant</b> if duration of treatment insufficient to treat condition eg. Antibiotics, or if no reducing course eg. Oral steroids                                                                                                        |
| <b>5. Drug Interactions</b>                         | Drug interaction                        | Excludes 2 items prescribed from same class e.g omeprazole with lansporazole (Duplication)                                                     | <b>Serious</b> if drug orders could exacerbate a patient's condition eg. Drug-drug interaction | <b>Significant</b> if manufacturer advises the combination is contraindicated, should be avoided, or advises caution; <b>Serious</b> if adverse events highly probable                                                                                                                                                            |
|                                                     | Drug interaction not taken into account | As above: unable to differentiate drug interaction and drug interaction not taken into account from available data                             |                                                                                                |                                                                                                                                                                                                                                                                                                                                   |
| <b>6. Omission of medication</b>                    | Omission on admission                   |                                                                                                                                                | <b>Significant</b> (regular medication)                                                        | -                                                                                                                                                                                                                                                                                                                                 |
|                                                     | Omission on discharge                   |                                                                                                                                                | <b>Significant</b>                                                                             | -                                                                                                                                                                                                                                                                                                                                 |
|                                                     | Drug not prescribed but indicated       |                                                                                                                                                | -                                                                                              | <b>Minor</b> if medication is unlikely to significantly impact patient care; <b>Significant</b> if medication would have significant impact on clinical course <b>Serious</b> if medication would alleviate a serious condition /patient is in acute distress; <b>Potentially lethal</b> if medication is potentially life saving |
| <b>7. Excessive/unnecessary</b>                     | Duplication                             | Includes a second agent prescribed which contains an ingredient already being taken; 2 drugs prescribed from the same class/with same clinical | <b>Minor</b> if duplicate therapy prescribed without potential for increased adverse events    | <b>Significant, Serious, Potentiallylethal:</b> As for overdose when duplicated items co-administered (3)                                                                                                                                                                                                                         |

|                                                |                                                |                                                                                                                                                                                          |                                                                                                                                                                                          |                                                                                                                                                                                         |
|------------------------------------------------|------------------------------------------------|------------------------------------------------------------------------------------------------------------------------------------------------------------------------------------------|------------------------------------------------------------------------------------------------------------------------------------------------------------------------------------------|-----------------------------------------------------------------------------------------------------------------------------------------------------------------------------------------|
| prescribing                                    | Unintentional prescription of drug             | effect eg. Lansoprazole + omeprazole<br>Drug prescribed was not that desired. Includes prescription of a discontinued drug, excluding discontinuation due to ADR , or course is too long | -                                                                                                                                                                                        | Judgement used based on Equip severity categories                                                                                                                                       |
| 8. Clinical Safety Errors                      | No maximum dose                                | Excludes prescriptions with no frequency (administration times missing/incorrect)                                                                                                        | <b>Minor</b> - order lacked specific drug, dose, strength, frequency or route information                                                                                                | <b>Significant</b> if no maximum dose stated for opioids                                                                                                                                |
|                                                | Clinical contraindication                      | Contraindication according to summary of product characteristics                                                                                                                         | <b>Serious</b> if drug orders could exacerbate a patient's condition eg. Drug-disease interaction                                                                                        | <b>Significant</b> if administration unlikely to have serious clinical consequences in the given situation                                                                              |
|                                                | Continuation after ADR                         |                                                                                                                                                                                          | -                                                                                                                                                                                        | Judgement used based on Equip severity categories                                                                                                                                       |
|                                                | No dosage alteration after levels out of range |                                                                                                                                                                                          | -                                                                                                                                                                                        | Judgement used based on Equip severity categories                                                                                                                                       |
| 9. Lack of clear directions for administration | Administration times incorrect/missing         | No frequency/times of dosing incorrect eg. In relation to food, morning vs night.                                                                                                        | <b>Minor</b>                                                                                                                                                                             | <b>Significant</b> if administration time would be expected to affect treatment eg. Exenatide with meals, hypnotics at night                                                            |
|                                                | Incorrect route                                |                                                                                                                                                                                          | <b>Minor</b> if unlikely to be carried out/little chance of toxicity/therapeutic failure; <b>Significant</b> if wrong route to treat condition; <b>Serious</b> if potential for toxicity | -                                                                                                                                                                                       |
|                                                | IV instructions incorrect/missing              |                                                                                                                                                                                          | -                                                                                                                                                                                        | Judgement used based on Equip severity categories                                                                                                                                       |
|                                                | Route missing                                  |                                                                                                                                                                                          | <b>Minor</b> - order lacked specific drug, dose, strength, frequency or route information                                                                                                | -                                                                                                                                                                                       |
|                                                | Daily dose divided incorrectly                 | Number of dosing intervals incorrect. Excludes under/overdose                                                                                                                            | -                                                                                                                                                                                        | <b>Minor</b> if dosing intervals are not standard, but are unlikely to significantly affect treatment; <b>Significant</b> if dosing intervals are inappropriate to treat the condition; |

1  
2  
3  
4  
5  
6  
7  
8  
9  
10  
11  
12  
13  
14  
15  
16  
17  
18  
19  
20  
21  
22  
23  
24  
25  
26  
27  
28  
29  
30  
31  
32  
33  
34  
35  
36  
37  
38  
39  
40  
41  
42  
43  
44  
45  
46  
47  
48  
49

|                          |               |                                                                                                                                                                       |   |                                                                                                                                                                            |
|--------------------------|---------------|-----------------------------------------------------------------------------------------------------------------------------------------------------------------------|---|----------------------------------------------------------------------------------------------------------------------------------------------------------------------------|
|                          |               |                                                                                                                                                                       |   | <b>Serious</b> if medication has narrow TI and dosing intervals may affect toxicity/efficacy eg. Parenteral aminoglycosides                                                |
| <b>10. Miscellaneous</b> | No indication | Includes PRN medications, where lack of indication on prescription could prevent administration. Excludes failure to write an indication when prescribing antibiotics | - | <b>Minor</b> if indication not written up for PRN medication; <b>Significant</b> if indication not written up for formulations which are licensed for specific conditions. |
|                          | Miscellaneous | Illegible drug details, non-standard abbreviations, patient details incorrect/missing, warfarin fixed dose prescribed.                                                | - | Judgement used based on Equip severity categories                                                                                                                          |

Abbreviations: TI- therapeutic index, CD- controlled drug, ADR- adverse drug reaction, PRN- when required

Table 32. Summary data showing prevalence and severity of errors observed

|                             |                 | Total Prescriptions | One or more error reported |                        | Error Severity         |                        |                      |                        | Total errors |
|-----------------------------|-----------------|---------------------|----------------------------|------------------------|------------------------|------------------------|----------------------|------------------------|--------------|
|                             |                 |                     | No (%)                     | Yes (%)                | Minor (%)              | Significant (%)        | Serious (%)          | Potentially Lethal (%) |              |
| <b>All</b>                  |                 | <b>4238</b>         | <b>2381<br/>(56.2)</b>     | <b>1857<br/>(43.8)</b> | <b>1264<br/>(42.0)</b> | <b>1629<br/>(54.1)</b> | <b>109<br/>(3.6)</b> | <b>9<br/>(0.3)</b>     | <b>3011</b>  |
| <b>Prescriber Grade</b>     | Newly Qualified | 1805                | 1087<br>(60.2)             | 718<br>(39.8)          | 519<br>(48.8)          | 507<br>(47.7)          | 35<br>(3.3)          | 3<br>(0.3)             | 1064         |
|                             | Junior          | 1484                | 755<br>(50.9)              | 729<br>(49.1)          | 496<br>(39.2)          | 725<br>(57.4)          | 41<br>(3.2)          | 2<br>(0.2)             | 1264         |
|                             | Mid Grade       | 366                 | 190<br>(51.9)              | 176<br>(48.1)          | 93<br>(33.6)           | 166<br>(59.9)          | 15<br>(5.4)          | 3<br>(1.1)             | 277          |
|                             | Senior          | 142                 | 96<br>(67.6)               | 46<br>(32.4)           | 36<br>(42.4)           | 43<br>(50.6)           | 6<br>(7.1)           | 0<br>(0)               | 85           |
|                             | Non-medical     | 35                  | 26<br>(74.3)               | 9<br>(25.7)            | 8<br>(57.1)            | 5<br>(35.7)            | 1<br>(7.1)           | 0<br>(0)               | 14           |
|                             | unknown/other   | 406                 | 227<br>(55.9)              | 179<br>(44.1)          | 112<br>(36.5)          | 183<br>(59.6)          | 11<br>(3.6)          | 1<br>(0.3)             | 307          |
| <b>Training</b>             | Liverpool       | 1290                | 787<br>(61.0)              | 503<br>(39.0)          | 270<br>(35.4)          | 456<br>(59.8)          | 36<br>(4.7)          | 1<br>(0.1)             | 763          |
|                             | Non-Liverpool   | 922                 | 478<br>(51.8)              | 444<br>(48.2)          | 342<br>(43.8)          | 420<br>(53.8)          | 19<br>(2.4)          | 0<br>(0)               | 781          |
|                             | Unknown         | 2026                | 1118<br>(55.2)             | 908<br>(44.8)          | 652<br>(44.4)          | 753<br>(51.3)          | 54<br>(3.7)          | 8<br>(0.5)             | 1467         |
| <b>Admission/ Discharge</b> | Discharge       | 2467                | 1615<br>(65.5)             | 852<br>(34.5)          | 685<br>(52.5)          | 584<br>(44.8)          | 32<br>(2.5)          | 4<br>(0.3)             | 1305         |
|                             | Admission       | 1744                | 756<br>(43.4)              | 988<br>(56.7)          | 576<br>(34.2)          | 1030<br>(61.1)         | 75<br>(4.4)          | 5<br>(0.3)             | 1686         |
|                             | Unknown         | 27                  | 12<br>(44.44)              | 15<br>(55.55)          | 3<br>(15)              | 15<br>(75)             | 2<br>(10)            | 0<br>(0)               | 20           |
| <b>Ward Area</b>            | Medicine        | 2059                | 1083<br>(52.6)             | 976<br>(47.4)          | 634<br>(39.0)          | 921<br>(56.7)          | 64<br>(3.9)          | 6<br>(0.37)            | 1625         |

|                               |                      |      |               |                                               |               |               |             |            |     |
|-------------------------------|----------------------|------|---------------|-----------------------------------------------|---------------|---------------|-------------|------------|-----|
|                               | Surgery              | 1395 | 836<br>(59.9) | 559<br>(40.1)                                 | 448<br>(50.1) | 417<br>(46.6) | 27<br>(3.0) | 2<br>(0.2) | 894 |
|                               | Mental health        | 96   | 66<br>(68.8)  | 30<br>(31.3)                                  | 24<br>(60)    | 16<br>(40)    | 0<br>(0)    | 0<br>(0)   | 40  |
|                               | Accident & Emergency | 8    | 1<br>(12.5)   | 7<br>(87.5)                                   | 1<br>(9.1)    | 10<br>(90.9)  | 0<br>(0)    | 0<br>(0)   | 11  |
|                               | Critical care        | 17   | 14<br>(82.4)  | 3<br>(17.7)                                   | 1<br>(25.0)   | 3<br>(75.0)   | 0<br>(0)    | 0<br>(0)   | 4   |
|                               | Unknown              | 663  | 383<br>(57.8) | 280<br>(42.2)                                 | 156<br>(35.7) | 262<br>(60.0) | 18<br>(4.1) | 1<br>(0.2) | 437 |
| <b>Prescription contains#</b> | Antibiotic           | 724  | 301<br>(41.6) | 423 (58.4)<br><b>(Antibiotic: 130 (18.0))</b> | 57<br>(29.8)  | 118<br>(61.8) | 16<br>(8.4) | 0<br>(0)   | 191 |
|                               | Insulin              | 129  | 42<br>(32.6)  | 87 (67.4)<br><b>Insulin: 20 (15.5)</b>        | 12<br>(37.5)  | 19<br>(59.4)  | 1<br>(3.1)  | 0<br>(0)   | 32  |
|                               | Warfarin             | 196  | 71<br>(36.2)  | 125 (63.8)<br><b>Warfarin: 18 (9.2)</b>       | 6<br>(23.1)   | 16<br>(61.5)  | 4<br>(15.4) | 0<br>(0)   | 26  |
|                               | Oxygen               | 36   | 7<br>(19.4)   | 29 (80.6)<br><b>Oxygen: 2 (5.6)</b>           | 1<br>(14.3)   | 5<br>(71.4)   | 1<br>(14.3) | 0<br>(0)   | 7   |

\* Relates to errors per prescriptions written, not errors per number of items prescribed

# Error severities, total errors and error rates relate to errors associated with Antibiotics/Insulin/Warfarin/Oxygen only

**Table 4.** Summary of the Errors Observed which were Considered to be Potentially Lethal

| Error Description                                                                                                | Category                                       | Prescriber Grade | Ward Area | Admission/ Discharge |
|------------------------------------------------------------------------------------------------------------------|------------------------------------------------|------------------|-----------|----------------------|
| Gliclazide 400mg prescribed when 40mg needed                                                                     | 1- Dosing Errors                               | Newly qualified  | Medicine  | Discharge            |
| Digoxin 625micrograms prescribed when 62.5micrograms needed                                                      | 1- Dosing Errors                               | Newly qualified  | Medicine  | Discharge            |
| Oxycodone 500mg prescribed: overdose                                                                             | 1- Dosing Errors                               | Mid Grade        | Surgery   | Admission            |
| Methotrexate prescribed daily, not weekly                                                                        | 1- Dosing Errors                               | Junior           | Medicine  | Admission            |
| Doxazocin prescribed; had been stopped by general practitioner due to angioedema                                 | 3. Allergy status missing/ significant allergy | Junior           | Medicine  | Admission            |
| Phenytoin dose of 300mg daily incorrectly prescribed as 800mg                                                    | 1- Dosing Errors                               | Newly Qualified  | Medicine  | Discharge            |
| Midazolam IV for sedation: overdose                                                                              | 1- Dosing Errors                               | Mid Grade        | Unknown   | Admission            |
| Amiodarone loading dose of 200mg three times daily continued as a regular dose                                   | 1- Dosing Errors                               | Other            | Surgery   | Discharge            |
| Enoxaparin prescribed 1mg/kg once daily instead of 1mg/kg twice daily for a patient with acute coronary syndrome | 1- Dosing Errors                               | Mid Grade        | Medicine  | Admission            |

**Table 5.** Univariate statistics showing the significance of explanatory variables in predicting error rates in prescriptions.

| Variable                                                     | n    | ≥1 Error<br>n (%)     | No Error<br>n (%)    | Difference (95%CI)       | p-value |
|--------------------------------------------------------------|------|-----------------------|----------------------|--------------------------|---------|
| Prescriber Grade (n=3850)                                    |      | 1689                  | 2161                 |                          |         |
| <i>Newly qualified</i>                                       | 1803 | 716 (42%)             | 1087 (50%)           | -8% (-11.2% to -4.8%)    | <0.001  |
| <i>Junior</i>                                                | 1482 | 727 (43%)             | 755 (35%)            | 8% (4.9% to 11.1%)       |         |
| <i>Mid-grade</i>                                             | 366  | 176 (10%)             | 190 (8.8%)           | 1.2% (-0.7% to 3.1%)     |         |
| <i>Senior</i>                                                | 142  | 46 (2.7%)             | 96 (4.4%)            | -1.7% (-2.8% to -0.4%)   |         |
| <i>Non-medical</i>                                           | 35   | 9 (0.5%)              | 26 (1.2%)            | -0.7% (-1.3% to -0.1%)   |         |
| <i>Other</i>                                                 | 22   | 15 (0.9%)             | 7 (0.3%)             | 0.56% (0.1% to 1.1%)     |         |
| Discharge/Admission (n=3065)                                 |      | 1135                  | 1930                 |                          |         |
| Discharge                                                    | 2467 | 853 (75%)             | 1614 (84%)           | -9% (-12.0% to -6.0%)    | <0.001  |
| Admission                                                    | 598  | 282 (25%)             | 316 (16%)            |                          |         |
| Liverpool trained (n=1325)                                   |      | 518                   | 807                  |                          |         |
| <i>Liverpool</i>                                             | 35   | 14 (2.7%)             | 21 (2.6%)            | 0.1% (-1.7% to 1.9%)     | 0.911   |
| <i>Non-Liverpool</i>                                         | 1290 | 504 (97%)             | 786 (97%)            |                          |         |
| Hospital (n=4238)                                            |      | 1857                  | 2381                 |                          |         |
| <i>Hospital A</i>                                            | 762  | 366 (20%)             | 396 (17%)            | 3% (0.6% to 5.4%)        | <0.001  |
| <i>Hospital B</i>                                            | 513  | 239 (12%)             | 274 (12%)            | 0% (-2.0% to 2.0%)       |         |
| <i>Hospital C</i>                                            | 500  | 296 (16%)             | 204 (8.6%)           | 7.4% (5.4% to 9.4%)      |         |
| <i>Hospital D</i>                                            | 97   | 30 (1.6%)             | 67 (2.8%)            | -1.2% (-2.1% to -0.3%)   |         |
| <i>Hospital E</i>                                            | 371  | 160 (8.6%)            | 211 (8.9%)           | -0.3% (-2.0% to 1.4%)    |         |
| <i>Hospital F</i>                                            | 604  | 355 (19%)             | 249 (10%)            | 9% (6.8% to 11.2%)       |         |
| <i>Hospital G</i>                                            | 86   | 22 (1.2%)             | 64 (2.7%)            | -1.5% (-2.3% to -0.7%)   |         |
| <i>Hospital H</i>                                            | 807  | 290 (16%)             | 517 (22%)            | -6% (-8.4% to -3.6%)     |         |
| <i>Hospital I</i>                                            | 498  | 99 (5.3%)             | 399 (17%)            | -11.7% (-13.5% to -9.9%) |         |
| Ward Area (n=3575)                                           |      | 1577                  | 1998                 |                          |         |
| <i>Medical</i>                                               | 2059 | 977 (62%)             | 1082 (54%)           | 8% (4.8% to 11.2%)       | <0.001  |
| <i>Surgical</i>                                              | 1395 | 560 (36%)             | 835 (42%)            | -6% (-9.2% to -2.8%)     |         |
| <i>Accident &amp; Emergency</i>                              | 8    | 7 (0.4%)              | 1 (0.1%)             | 0.3% (-0.04% to 0.6%)    |         |
| <i>Mental health</i>                                         | 96   | 30 (1.9%)             | 66 (3.3%)            | -1.4% (-2.4% to -0.4%)   |         |
| <i>Critical care</i>                                         | 17   | 3 (0.2%)              | 14 (0.7%)            | -0.5% (-0.9% to -0.1%)   |         |
| Number of Medicines on Prescription (n=3386)<br>Median (IQR) |      | 8; (4,11)<br>(n=1435) | 4; (2,7)<br>(n=1951) | -4 (-4.5, -3.5)          | <0.001  |

n= number of prescriptions

**Table 6.** Multivariate logistic regression analysis for predicting error rates in prescriptions.

| Variable                          | Odds ratio (95%CI)  | p-value |
|-----------------------------------|---------------------|---------|
| <b>Hospital</b>                   |                     |         |
| <i>Hospital H</i>                 | 1                   |         |
| <i>Hospital A</i>                 | Not estimable*      |         |
| <i>Hospital B</i>                 | 1.11 (0.78 to 1.58) | 0.57    |
| <i>Hospital C</i>                 | 2.38 (1.63 to 3.46) | <0.001  |
| <i>Hospital D</i>                 | 0.64 (0.13 to 3.06) | 0.57    |
| <i>Hospital E</i>                 | 1.39 (0.96 to 2.01) | 0.08    |
| <i>Hospital F</i>                 | 3.53 (2.63 to 4.73) | <0.001  |
| <i>Hospital G</i>                 | 1.80 (1.03 to 3.12) | 0.04    |
| <i>Hospital I</i>                 | 1.11 (0.73 to 1.70) | 0.62    |
| <b>Prescriber Grade</b>           |                     |         |
| <i>Newly qualified</i>            | 1                   |         |
| <i>Junior</i>                     | 1.06 (0.85 to 1.32) | 0.61    |
| <i>Mid-grade</i>                  | 0.96 (0.64 to 1.44) | 0.83    |
| <i>Senior</i>                     | 0.97 (0.58 to 1.63) | 0.92    |
| <i>Non-medical</i>                | 0.59 (0.21 to 1.64) | 0.31    |
| <i>Other</i>                      | 1.50 (0.53 to 4.23) | 0.44    |
| <b>Discharge/Admission</b>        | 1.16 (0.70 to 1.92) | 0.58    |
| <b>Number of prescribed items</b> | 1.14 (1.12 to 1.17) | <0.001  |

Analysis contains only 2127 records (50.2%) where complete data was provided for all variables

\* Trust provided no data on number of prescription items



1  
2  
3  
4 **Cross Sectional Study of Prescribing Errors in Patients Admitted to Nine Hospitals**  
5 **Across North West England**  
6  
7

8  
9 Seden K<sup>1,2</sup>, Kirkham JJ<sup>3</sup>, Kennedy T<sup>2</sup>, Lloyd M<sup>4</sup>, James S<sup>5</sup>, Mcmanus A<sup>5</sup>, Ritchings A<sup>6</sup>,  
10 Simpson J<sup>7</sup>, Thornton D<sup>8</sup>, Gill A<sup>9</sup>, Coleman C<sup>10</sup>, Thorpe B<sup>11</sup>, Khoo SH<sup>1,2</sup>  
11

12  
13  
14 NIHR Biomedical Research Centre, Royal Liverpool and Broadgreen University Hospital  
15 Trust, Liverpool, UK<sup>1</sup>; Faculty of Health & Life Sciences, University of Liverpool, Liverpool,  
16 UK<sup>2</sup>; Department of Biostatistics, University of Liverpool, Liverpool, UK<sup>3</sup>; Pharmacy  
17 Department, Whiston Hospital- St Helens and Knowsley Teaching Hospitals NHS Trust,  
18 Whiston, UK<sup>4</sup>; Pharmacy Department, Royal Liverpool and Broadgreen University Hospitals  
19 NHS Trust, Liverpool, UK<sup>5</sup>; Pharmacy Department, Mid Cheshire Hospitals NHS Foundation  
20 Trust, Cheshire, UK<sup>6</sup>; Pharmacy Department, Warrington and Halton Hospitals NHS  
21 Foundation Trust, Warrington, UK<sup>7</sup>; Pharmacy Department, Aintree University Hospitals  
22 NHS Foundation Trust, Liverpool, UK<sup>8</sup>; Pharmacy Department, Alder Hey Children's Hospital  
23 NHS Foundation Trust, Liverpool, UK<sup>9</sup>; Pharmacy Department, Nobles Hospital, Douglas,  
24 Isle of Man, UK<sup>10</sup>; Pharmacy Department, Cheshire and Wirral Partnership NHS Foundation  
25 Trust, Wirral, UK<sup>11</sup>  
26  
27  
28  
29  
30  
31

32 Corresponding Author: Saye Khoo  
33 Pharmacology Research Laboratories  
34 H Block, 1<sup>st</sup> Floor  
35 70 Pembroke Place  
36 Liverpool  
37 L69 3GF, UK  
38 [Khoo@liv.ac.uk](mailto:Khoo@liv.ac.uk)  
39  
40  
41  
42  
43  
44  
45  
46  
47  
48  
49  
50  
51  
52  
53  
54  
55  
56  
57  
58  
59  
60

## Article Summary

### 1. Article Focus

- Some studies have reported lower error rates with more senior prescriber grades, and insufficient undergraduate prescriber training as a potential risk for prescribing errors
- Prescriptions frequently contain multiple medications, but data about errors on complete prescriptions (all prescribed items on an inpatient chart or discharge prescription), which give a better estimate of numbers of patients at risk of harm, are lacking
- We aimed to determine the differences in prescribing error rates between grades of prescriber, ward area, admission or discharge and type of medication prescribed

### 2. Key Messages

- We observed an error rate of 10.9% per prescribed item, with only 56.2% of 4238 complete prescriptions remaining error free.
- In multivariate analysis, the strongest predictor for prescribing error was the number of medicines on each prescription.
- We found no overall difference in error rate amongst different grades of prescriber, and newly qualified doctors were not more likely to make errors than their senior colleagues.

### 3. Strengths and Limitations

- This was a large study across nine diverse hospital settings
- We determined the rate of errors on complete prescriptions as well as for rather than individually prescribed items, giving a better estimate of the numbers of patients affected by errors.
- We did not evaluate the impact of electronic prescribing on the prevalence and type of prescribing errors, however up to a quarter of the errors observed could potentially have been avoided through use of electronic prescribing and medicines administration systems

## Abstract

**Objective** To evaluate the prevalence, type and severity of prescribing errors observed between grades of prescriber, ward area, admission or discharge and type of medication prescribed~~prevalence, type and severity of prescribing errors made by different categories of prescriber, and the prevalence, type and severity of prescribing errors occurring at admission compared with on discharge prescriptions.~~

**Design** Ward-based clinical pharmacists prospectively documented prescribing errors at the point of clinically checking admission or discharge prescriptions. Error categories and severities were assigned at the point of data collection, and verified independently by the study team

**Setting** Prospective study of nine diverse National Health Service (NHS) hospitals in North West England, including teaching hospitals, district hospitals and specialist services for paediatrics, women and mental health.

**Results** Of 4238 prescriptions evaluated, one or more error was observed in 1857 (43.8%) prescriptions, with a total of 3011 errors observed. Of these, 1264 (41.9%) were minor, 1629 (54.1%) were significant, 109 (3.6%) were serious and 9 (0.30%) were potentially life-threatening. The majority of errors considered to be potentially lethal (n=9) were dosing errors (n=8), mostly relating to overdose (n=7). The rate of error was not significantly different between newly qualified doctors compared with junior, middle grade or senior doctors. Multivariable analyses revealed the strongest predictor of error was the number of items on a prescription (risk of error increased 14% for each additional item). We observed a high rate of error from medication omission, particularly amongst patients admitted acutely into hospital. Electronic prescribing systems could potentially have prevented up to a quarter of (but not all) errors.

**Conclusions** In contrast to other studies, prescriber experience did not impact on overall error rate (although there were qualitative differences in error category). Given that multiple drug therapies are now the norm for many medical conditions, health systems should introduce and retain safeguards which detect and prevent error, in addition to continuing training and education, and migration to electronic prescribing systems.

## Introduction

Prescribing errors ~~are is~~ common, with systematic reviews suggesting that as many as 50% of hospital admissions and 7% of medication orders are affected.<sup>1</sup> In recent studies, prescribing errors have been found to affect approximately 9-15% of medication orders for hospital inpatients in the United Kingdom (UK).<sup>2,3</sup> Over one third of 651 patients were found to have a prescribing error occurring at hospital admission in the United States (US).<sup>4</sup> Prescribing errors are also prevalent in primary care, affecting 37% of 9385 prescriptions in the US,<sup>5</sup> and one in eight patients (one in 20 prescription items) in the UK.<sup>6</sup> ~~In a UK study of 3695 inpatient episodes, 15% of patients experienced an adverse drug reaction (ADR), more than half of which were considered definitely or possibly avoidable. 59% of ADRs were linked to drug interactions, and ADRs were found to increase length of hospital stay in 27% of episodes.~~<sup>7</sup> A study in the Netherlands evaluating medication omission errors in elderly patients admitted to hospital reported adverse consequences in 21% of 100 patients.<sup>8</sup>

Human error in healthcare may be considered in the context of individuals or health systems.<sup>9-11</sup> While personal factors such as forgetfulness, inattention, poor motivation, carelessness, negligence, and recklessness are important, a health systems approach more comprehensively addresses recurrent errors and organisation factors and processes which may give rise to that error. The person, the team, the task, the workplace and the institution as a whole are considered,<sup>9</sup> which identify weaknesses in the system's defences.<sup>9</sup> For example, higher hospital mortality at weekends may be associated with lower numbers of senior staff available outside of the normal working week.<sup>12,13</sup>

Data on ~~factors which may contribute to causes of~~ prescribing errors, for example differences between grades of prescriber, ward area, admission or discharge and type of medication prescribed are sparse.<sup>3,14,15</sup> Existing data suggest that newly qualified and junior doctors are twice as likely to make prescribing errors than senior doctors, taking into account the larger volume of prescriptions written by more junior prescriber grades.<sup>3</sup> Provision of sufficient undergraduate training to allow medical students to become safe prescribers when they begin work as newly qualified doctors is widely recognised as an important factor in reducing prescribing errors.<sup>14,16-18</sup> Teaching in UK medical schools has changed considerably over the last decade, with the General Medical Council stipulating that medical students must be adequately prepared to prescribe drugs and manage risk at the point of graduation.<sup>19,20</sup>

Whilst previous studies have evaluated error for individual medications, few studies have systematically evaluated complete prescriptions (all items included on a single prescription chart or discharge prescription at the time of clinical pharmacist check) to evaluate factors associated with prescribing error.<sup>1-3</sup> This is important as it gives a more accurate estimate of the numbers of patients who are potentially put at risk of harm by prescribing errors. We undertook a prospective survey of prescribing errors in nine diverse National Health Service (NHS) hospitals in the North West of England, aiming to examine the differences in prescribing error rates between grades of prescriber, ward area, admission or discharge, hospitals and the type and number of medication prescribed. In order to further evaluate the role of undergraduate training, we also tested for a relationship between occurrence of error and medical school training of prescribers. Univariate analysis and multivariate logistic regression was used to evaluate factors associated with prescribing errors. prevalence, type and severity of errors made by different categories of prescriber, and also the prevalence, type and severity of prescribing errors at admission, discharge and in different ward areas.

Specifically, we recorded only errors concerned with issuing of the prescription, excluding errors in clinical decision making, or 'downstream' errors in executing the prescription.

## Methods

### Setting

A total of nine NHS hospitals from the Merseyside and Cheshire region took part in the audit. These comprised large teaching hospitals, general hospitals, specialist centres for paediatrics, women's health and mental health (Table 1). One hospital was using complete electronic prescribing systems (inpatient prescribing, medication ordering, discharge prescriptions) on some wards at the time of the audit. Eight of the hospitals were using paper prescription charts for inpatients and either handwritten or transcribed electronically generated discharge prescriptions. In this setting, ward-based clinical pharmacists check inpatient prescriptions at or soon after patient admission, when medicines reconciliation is undertaken. Inpatient prescription charts are then checked at least daily by the pharmacist. Discharge prescriptions are checked and authorised by a clinical pharmacist prior to supply of medication. Pharmacists may amend or clarify some aspects of prescribing, or discuss with the clinical team any recommendations or safety issues at these points of care. Clinical pharmacists may also participate in ward rounds and multidisciplinary team meetings, where prescribing may be discussed with clinicians, clarified or amended.

### Data Collection

~~A total of nine NHS hospitals from the Merseyside and Cheshire region took part in the audit. These comprised large teaching hospitals, general hospitals, specialist centres for paediatrics, women's health and mental health.~~ As this was an audit-survey of unlinked anonymised prescriptions, Ethics approval was not required in accordance with local guidance. We aimed to capture data from all seven hospital trusts in the region. Two additional hospitals adjacent to and linked with healthcare provision in the Merseyside region were also audited. The number of prescriptions audited was empirically determined in order to generate a sample size equivalent to a large study recently undertaken in the UK.<sup>3</sup> In order to audit practice across the region, each hospital was asked to audit a minimum of 400 prescriptions.

We adopted the following definition of prescribing errors for the study, which excludes adherence to local prescribing policy and guidelines: "A clinically meaningful prescribing error occurs when, as a result of a prescribing decision or prescription writing process, there is an unintentional significant (1) reduction in the probability of treatment being timely and effective or (2) increase in the risk of harm when compared with generally accepted practice".<sup>21</sup> A standard questionnaire collected data on error category and severity (based on EQUIP error classifications). The EQUIP study was a large prospective survey of prescribing errors affecting hospital inpatients in the UK,<sup>3</sup> and the error classifications were therefore considered relevant to our setting. Nominated ward-based clinical pharmacists prospectively documented prescribing errors at the point of checking ~~inpatient admission~~ or discharge prescriptions, during normal pharmacy working hours, therefore each audit form was a point prevalence of prescribing errors at the time of pharmacist clinical check. Acute admission was defined as the first 24 hours in hospital. For all prescription sheets generated in acute admission settings, a separate audit form was completed (to allow for emergency prescribing in the absence of a full drug history without this being recorded as an error) and we sought to record only unintended medication omissions (e.g. following medicines reconciliation with general practices or primary healthcare databases). Hospitals were advised to complete the study on different days of the week over alternate days throughout the period of the audit, in order to capture an even spread of days. ~~f~~For example data collection would occur weekly, on Monday in week one, Tuesday in week two, Wednesday in week three, in order to minimise double auditing of the same patient on admission to hospital and subsequent

admission to a ward. Therefore, if patients were audited twice, an interval of at least one week would separate each audit form, unless their acute admission/inpatient /discharge prescription were audited on the same day. If items on prescriptions had been previously screened, they would be counted again in any subsequent auditing, though there would be a one week interval since previous auditing, or the patient would be a different stage of hospital admission. All types of inpatient medication order were audited, including IV fluids, when required and once only medication.

### **Prescriber Category**

Pharmacists were required to indicate the category of prescribers on data collection forms. For this analysis, prescribers were categorised as follows: newly qualified (fFoundation yYear 1, hHouse officers), jJunior (fFoundation yYear 2, specialist or 'core' training years 1 & 2), mid grade (specialist registrars, training fFellows), senior (cConsultant), non-medical (nurse or pharmacist prescribers), other (for example locum doctors for whom grade was unclear ~~or not recorded~~) and unknown (no information-not concerning prescriber recorded).

### **Grading of prescribing errors**

We modified EQUIP study criteria<sup>3</sup> for error categorisation and severity classification by adding or clarifying severity criteria for all error categories, and by grouping errors into ten distinct areas according to origin-stage of the prescribing process (see below and Table 24). 'Exclusion' and 'inclusion' of errors into EQUIP study error types were defined, in order to differentiate categories with potential overlap. Severity ratings were further defined and assigned to each error category based on modified EQUIP study criteria and-taking into account the perceptions of the original pharmacist gradings, ~~and reference to the licensing information of the relevant medication.-~~ Severity ratings related to the potential severity had the error been allowed to progress through to the patient, as the majority of errors were corrected prior to the point of administration. In order to limit misclassification error, the original 29 EQUIP categories were batched into 10 different types of error groups as follows: (1) Dosing errors, (2) Writing errors, (3) Allergy status errors, (4) Duration of treatment wrong/not specified, (5) Drug interactions, (6) Omission of medication, (7) Excessive/unnecessary prescribing, (8) Safety errors, (9) Lack of clear directions for administration, (10) a new error category (Miscellaneous) was added (Table 24 ). The modification and definition of error categories and severities was undertaken by two members of the study team (KS, SK) and agreed by a third (TK).

Despite using a standard set of definitions, we noted discrepancies across various hospitals in both error categorisation and severity rating. In particular there was a tendency to over-report all errors and to overestimate their potential severity. This was confirmed by a *post-hoc* inter-rater agreement analysis. A set of six sample prescriptions was generated. A list of 14 standard sample errors was decided by the study team, including study error type and severity, according to the criteria in Table 24 utilised for analysis of the main study. The errors selected occurred frequently in the main study, and covered a broad range of error categories and severities. Six pharmacists from each participating hospital were asked to each screen the six prescription scenarios containing the 14 errors and to record any observed errors, allocating error types and severities. The exact agreement percentages between category classification, severity classification and both combined were computed to measure the absolute concordances between pharmacist scores against the gold standard assessment. ~~For all prescriptions, approximately 75% of error categories were correctly identified by pharmacists when compared to the standards. Only 47% of~~

~~severity ratings were concordant with the standards, and 40% of pharmacists rated both error category and severity in concordance with the standards.~~

~~Therefore, i~~In order to limit inter-observer bias, all grading and severity of errors identified in the main study were independently reassessed by two members of the study team (KS and SK), with discordant assessments collectively discussed with a third (TK) in order to agree a final categorisation for error type and severity. For severity ratings, the summary of product characteristics for relevant medication was consulted, in order to determine potential implications of different degrees of overdose, underdose, of drug interactions, and also to confirm clinical contra-indications. ~~A total of 143 errors were not considered true errors of the process of prescribing and were excluded. The error category was re-graded for 434 errors, and severity was re-graded for 724 errors, which was predominantly a down-grading.~~

### **Statistical Analyses**

Data were analysed at the prescription level using complete case data. The prevalence and severity of errors observed were tabulated using percentage frequencies. A ~~forest~~Forest plot was produced to present the error ~~prevalence~~incidence rate and 95% confidence interval (95% CI) for each hospital and grade of prescriber. For the formal statistical analysis, when there was more than one error on a prescription, only the most severe error was included. This approach was used to ensure that the errors included in the analysis were independent.~~For the formal statistical analysis, when there was more than one error on a prescription, only the most severe error was included.~~ In this study, we assessed hospital, prescriber grade (newly qualified, junior, mid-grade, senior, non-medical, other), ward area (medical, surgical, A&E, mental health, critical care), number of prescribed medicines, an indicator to denote whether the prescription was prescribed on admission or on discharge and an indicator to denote whether the prescriber was Liverpool trained or not as potential risk factors. Univariate statistical analyses were performed using a chi-squared test except for continuous data, which were analysed using the Mann-Whitney U test. A multivariate logistic regression model for a prescription error was fitted to the data. Results are given in terms of an odds ratio (OR) and associated 95% CI. All risk factors that were statistically significant ( $p < 0.1$ ) in the univariate analysis were considered for inclusion in the multivariate model with the exception of ward area as a number of hospitals only reported a single specialty type.

All statistical analysis was carried out using the statistical software package SPSS (version 20) using a two-sided significance level of 0.05 (5%) throughout.

## Results

### Error Classification

During the *post-hoc* inter-rater agreement analysis, For all prescriptions, approximately 75% of error categories were correctly identified by pharmacists when compared to the standards. Only 47% of severity ratings were concordant with the standards, and 40% of pharmacists rated both error category and severity in concordance with the standards.

R<sub>Ae</sub>-assessment of errors by the study team resulted in exclusion of a total of 143 errors which were not considered true errors of the process of prescribing and were excluded. The error category was re-graded for 434 errors, and severity was re-graded for 724 errors, which was predominantly a down-grading.

### *Descriptive data and severity of errors*

A total of 4238 prescriptions were evaluated; of these, 1857 (43.8%) prescriptions contained at least one error (Table 32). The overall **prevalence** of prescribing errors (number of prescriptions with one or more error/prescriptions evaluated) ranged from 20% to 60% across the nine hospitals (Figure 1a). The rate of errors per prescribed item was 10.9%.

A total of 3011 individual errors were observed within the 1857 prescriptions containing an error. Of these 3011 errors, 1264 (41.9%) were minor, 1629 (54.1%) were significant, 109 (3.6%) were serious and nine (0.30%) were potentially life-threatening (Table 32). Details of all potentially life-threatening errors are listed in Table 3 and mainly comprised dosing errors (n=8), particularly overdose (n=7), with one incidence of under dose. A further error considered to be potentially lethal related to prescription of a medicine to which the patient had previously had a serious allergic reaction.

The proportion of errors categorised with severity as significant or higher by prescriber grade were as follows: all prescribers 58.0%, newly qualified 51.2%, junior 60.8%, mid grade 66.4%, senior 57.6% ( $\chi^2_{trend}$   $p < 0.001$  for univariate analysis, although this association disappeared when corrected for other potential confounders)(Table 32).

Fewer errors were observed on discharge prescriptions than on prescriptions written on admission. More errors were observed in prescriptions containing antibiotics, insulin, warfarin and oxygen, although this does not take into account the number of items on each prescription. Whether doctors were Liverpool trained or not did not affect the number of errors observed (Table 32).

Differences in error prevalence and error types were observed in individual participating hospitals. The lowest rates of errors were reported for the paediatrics specialty, with 0.07 errors observed per prescribed item, and 0.26 errors observed per prescription. However, in multivariate analysis, there was no significant reduction in error risk and it is likely that the effect could be due to lower number of items per prescription (mean 3.5, vs pooled data: 6.3). The most common error types were dosing errors (30%) and medication omission (23.1%).

Significantly lower risk of errors was observed in the hospital providing specialist services for women ( $p = 0.04$ , Table 6) in multivariate analysis. One of the lowest error rates per prescription was observed (0.28), although the error rate per prescribed item (0.11) was



1  
2  
3 equal to that of the pooled data. The most common error type observed was  
4 excessive/unnecessary prescribing (50%). No errors of medication omission were observed.  
5 This hospital also had a low number of items per prescription (2.4), and was using electronic  
6 prescribing systems on some wards.  
7  
8  
9

### 10 *Error types*

11  
12 The most frequent error types for all prescribers were medication omission, accounting for  
13 26.9%, writing errors accounting for (20.7%) and dosing errors accounting for (20.6%) of all  
14 errors recorded. There was little difference in the variability of error types across different  
15 prescriber grades (Figure 2).  
16  
17

### 18 *Risk factor analysis*

19  
20  
21 Results of the univariate analysis are shown in Table 54. Missing data limited inclusion of all  
22 reported prescriptions in risk factor analysis, notably as one acute hospital failed to return  
23 data on number of items on each prescription. All factors considered appeared to show a  
24 significant difference except for medical school training of doctors, which made no significant  
25 difference (p=0.91) to whether an error occurred on the prescription. Multivariate risk factor  
26 analysis showed that the likelihood of an error increased for every additional item included  
27 on the prescription (OR 1.14, 95% C 1.12, 1.17, p<0.001) (Table 54). Therefore, for each  
28 additional item on the prescription, the risk of an error occurring increased by about 14%.  
29 There was also a trend towards errors being more likely to occur on admission prescriptions  
30 than on discharge prescriptions, with an odds ratio (OR) of 1.16 (95% CI 0.70, 1.92, p=0.58),  
31 although this difference did not reach statistical significance (Table 65). No significant  
32 differences were found in error rates between different prescriber grades, when compared to  
33 newly qualified doctors- (Figure 24b, Figure 32) in multivariate analyses.  
34  
35  
36  
37  
38  
39

### 40 **Discussion**

41  
42 In this large study, only 56.2% of 4238 prescriptions written had no reported errors. Of the  
43 errors recorded, 41.9% were minor, 54.1% significant, 3.6% serious and 0.3% potentially life  
44 threatening. It is important to note that severity ratings relate to the potential severity had  
45 the error been allowed to progress through to the patient - in fact the majority of errors were  
46 corrected prior to the point of administration. In multivariate analysis, the strongest predictor  
47 for prescribing error was the number of medicines on each prescription, with risk for  
48 prescribing error increasing by 14% for every additional medication item prescribed. Where  
49 data were available, prescriptions contained an average of 6.3 medication items, although  
50 this varied from 2.4 – 7.5 items according to medical specialty surveyed. Uncorrected  
51 analyses suggested that errors were frequent in prescriptions containing insulin (15.5%),  
52 antibiotics (18%), warfarin (9.2%) and oxygen (5.6%), although these patients were very  
53 likely to have been receiving multiple medications. Error rates were highest amongst  
54 specialties which prescribed a broad range of medications (e.g. acute medicine, compared  
55 to elective surgery), and also differed between different hospital Trusts, with hospitals  
56 specialising in paediatrics (~~Hospital-I~~), maternal health (~~Hospital-G~~) and mental health  
57 (~~Hospital-D~~) exhibiting the lowest error rates. However, when corrected for number of  
58  
59  
60

1  
2  
3 medications, these differences did not remain significant, with the exception of maternal  
4 health.

5  
6 The most frequent error encountered was unintended medication omission following acute  
7 hospital admission (0.97 errors/prescription written, versus 0.53 for discharge medications).  
8 When adjusted in multivariable analyses (Table 65) there was no statistically significant  
9 difference in error rates between admission and discharge. We found no overall difference in  
10 error rate amongst different grades of prescriber, and newly qualified doctors were not more  
11 likely to make errors than their senior colleagues. Although numbers were relatively small,  
12 we observed no difference in error rate amongst newly qualified doctors by undergraduate  
13 training, and doctors trained in Liverpool were neither more nor less likely to commit  
14 medication errors. The categories and severity of errors made by different prescriber grades  
15 were broadly similar (Table 32, Figure 2), however some differences were observed. For  
16 example, writing errors were more frequently observed with newly qualified doctors,  
17 medication omission was more frequently observed with junior and mid grade doctors, and  
18 dosing errors were more frequently observed with mid grade doctors.  
19  
20  
21  
22

23 These results are consistent with previously published studies. Both the EQUIP and  
24 PRACTiCe Studies<sup>3 6</sup> reported error rates of approximately 1 in 10 medications prescribed  
25 (we observed a rate of 10.9%). Given the high number of medications prescribed (mean of  
26 6.3 items/prescription) nearly half of all prescriptions contained at least one error.

27 -A systematic review found prescribing errors to be more common in adults than in children.<sup>1</sup>  
28 A study in Spain comparing paediatric wards with obstetrics found that paediatric patients  
29 had a fourfold higher risk of serious errors than the maternity population (2.3% vs 14.3%),  
30 which were mainly related to drug dosing, ~~which is in keeping with our data.~~<sup>22</sup> This is in  
31 keeping with our data, as we observed a low error rate for the paediatrics specialty, although  
32 this was likely due to a low number of prescribed items. Dosing errors were the most  
33 common error type. Another study reported that prescribing errors were more common in  
34 primary care amongst men compared to women.<sup>6</sup> We observed a significantly lower risk for  
35 errors in specialist services for women.  
36  
37  
38

39 In the EQUIP study, multivariate analysis showed that all grades of doctors were more likely  
40 to write a prescription containing an error than consultants.<sup>3</sup> A retrospective study which  
41 evaluated errors on discharge prescriptions found no significant difference in error rates  
42 between prescriber grades, although no senior (consultant) level prescribers were  
43 included.<sup>15</sup> In primary care, the grade of general practitioner was not associated with  
44 prescribing errors.<sup>6</sup> We observed no significant difference in prescribing error rates between  
45 prescriber grades, when compared to newly qualified prescribers. EQUIP also reported that  
46 medication orders issued at acute admission were 70% more likely to be associated with a  
47 prescribing error.<sup>3</sup> Another study found lower error rates on discharge prescription items  
48 than was observed with general inpatient prescribing, due to a lower rate of medication  
49 omission, however these factors were not corrected for the number of items on each  
50 prescription.<sup>2</sup> We observed a trend towards errors being more likely to occur on admission  
51 prescriptions than on discharge prescriptions, with an odds ratio (OR) of 1.16, although this  
52 did not reach significance in multivariate analysis.  
53  
54  
55  
56

57 Our study was limited by missing data (one acute hospital failed to return data on number of  
58 items on each prescription), and although pharmacists had received some basic training in  
59 completing the evaluations, post-hoc analyses suggested significant variability between  
60 pharmacists' classification of errors, and especially in assignment of severity classification.

Two of us independently revised each prescribing error and noted a tendency to over-estimate the severity of errors, and (in keeping with EQUIP criteria) included in our evaluations an assessment of whether or not a wrong dose was likely to have been actually administered based on tablet burden. We also refined EQUIP criteria to assign severity ratings to error categories where these had previously not been provided. Finally, by grouping errors into categories according to their origin and cause, we sought to reduce misclassification as far as possible. Since our data collection forms did not allow us to evaluate errors which had been missed, it is possible that our observed error rates may represent an under-estimate of the true burden of prescribing error.

Medication omission was the most prevalent error, representing 26.9% of all errors observed, which is consistent with previous reports.<sup>2 15</sup> Prescribing during acute admission in the absence of a full medication history may sometimes be unavoidable, and does not necessarily constitute an error. For this reason we discriminated between 'emergency' prescribing, and errors where a more complete or accurate medication history would have prevented omission of prescribed medications. Although we sought to capture only unintended medication omission, it is possible that there might still have been cases where the omission was intentional (for example, suspension of diuretics in a patient who was hypotensive or dehydrated on admission) but this intent had been missed by the pharmacist collecting the data. A sensitivity analysis showed that if all errors of medication omission either on discharge or admission were excluded, the number of errors totals 2249 (0.53 per prescription written); with 1471 (34.7%) prescriptions containing at least one error, which represents a significant reduction in overall prescribing error rate. A core role for clinical ward based pharmacists is medicines reconciliation for admitted patients. This involves detailed medication history taking, recording of full medication list in the patient's case notes, and discussion with the clinical team to ensure that all regular medicines are prescribed throughout the admission, if appropriate. Similarly, on discharge, pharmacists ensure that necessary regular medicines are continued, and that any medicines newly started during the admission are prescribed for discharge as appropriate. The majority of the omission errors reported will have been rectified during admission or prior to discharge, as a result of the pharmacist clinical check. This highlights the importance of medicines reconciliation as soon as practicable at hospital admission, in order to minimise the possibility of missed doses of essential medicines. The role of pharmacists in acute admission settings may therefore be of particular benefit.

EQUIP error categories which could potentially be eliminated by introduction of electronic prescribing (sStrength/dose missing, pProduct/formulation not specified, nNo signature, sStart date incorrect/missing, incorrect route, IV instructions incorrect/missing) accounted for 357 (11.9%) of the 3011 errors observed. A further 376 (12.5%) errors could be reduced by electronic prescribing, via alerts, cautions and required fields at the patient entry/prescribing stage, although many of these can be over-ridden by the prescriber.<sup>23</sup> These include: administration times missing/incorrect, duplication, CD requirements incorrect/missing. The extent to which electronic prescribing can eliminate particular error types depends on the individual systems used. Importantly, whilst electronic prescribing systems could potentially have prevented up to a quarter of errors, these systems are best utilised alongside rather than instead of existing safeguards. We did not formally evaluate differences in error rates between electronic prescribing and paper-based prescribing systems. Although one hospital (Hospital G) was utilising complete electronic prescribing systems on some wards at the time of the study, and many of the other hospitals were using electronically generated discharge summaries, we failed to observe any clear association with error rate, mainly because of the

1  
2  
3 large variability in case mix which impacted directly on the number of items/prescription. In  
4 contrast, EQUIP reported that electronic prescriptions were 12% less likely to be associated  
5 with a prescribing error than handwritten prescriptions.<sup>3</sup> Although electronic discharge  
6 summaries may reduce error due to legibility, they do not eliminate the transcription step  
7 from inpatient charts. One study which analysed 1808 handwritten and electronic discharge  
8 summaries found no difference in the number or types of errors observed.<sup>15</sup> It is also worth  
9 noting that electronic systems, while clearly offering an advantage over conventional  
10 medicines management and prescribing systems, have themselves been associated with  
11 new patterns of error. Studies in the UK and Australia found a significant reduction in  
12 prescribing errors detected after introduction of electronic prescribing systems, but also  
13 identified errors specific to the electronic prescribing system used, for example, incorrect  
14 product selected from drop-down menu, or incorrect dosing frequency selected.<sup>24-26</sup> These  
15 electronic systems will doubtless continue to improve through refinement.<sup>23 27</sup>

16  
17  
18  
19 The Erice Medication Errors Research Group (EMERGE) recommendations for reducing  
20 prescribing errors, includes training and assessment of prescribers, ongoing monitoring,  
21 awareness and communication.<sup>14</sup> Health systems which may impact on likelihood of error  
22 occurring include European harmonisation of prescribing, introduction of integrated  
23 prescription forms, use of IT systems such as electronic prescribing, and standardisation,  
24 evaluation, and certification of such systems. Involvement of clinical pharmacists at all points  
25 of the medication process is also recommended.<sup>14</sup> The latter is important since all the  
26 hospital Trusts in our survey had evolved systems to safeguard patients from prescribing  
27 error (regardless of the adoption of electronic prescribing), and this involved use of ward-  
28 based pharmacists and dispensary staff to perform routine checks on all prescriptions issued  
29  
30  
31 <sup>3 10 22 28</sup>. This ~~arguably likely~~ represents the 'last line of defence' against prescribing error,  
32 and has greatest utility when deployed in clinical areas associated with highest risk. One  
33 fundamental role of clinical pharmacists during acute admission is medicines reconciliation,  
34 where a patient's full medication history is determined and recorded using all available  
35 sources of information. Our findings suggest that removing this safeguard (e.g. through  
36 service reconfiguration or in an effort to reduce costs) could potentially lead to higher  
37 numbers of medication error actually reaching the patient.  
38  
39  
40  
41  
42  
43  
44  
45  
46  
47  
48  
49  
50  
51  
52  
53  
54  
55  
56  
57  
58  
59  
60

### **Acknowledgements**

We gratefully acknowledge the contributions of pharmacists who participated in this study. This work was funded through an unrestricted educational grant from Mersey Deanery, although design, execution, analysis and reporting was carried out independently by the study team.

[We thank Professor David Graham, Postgraduate Medical Dean, Mersey Deanery for supporting the project](#)

We thank the National Institute of Health Research (NIHR Department of Health) and the Northwest Development Agency (NWDA) for infrastructural and project support.

### **Declaration**

All authors have completed the Unified Competing Interest form and declare that (1) SK has received research funding for website development from Merck, Bristol Myers Squibb, Gilead, ViiV, Tibotec, and Abbott, and honoraria, travel support for conference attendance from Roche, Tibotec, and Viiv in the past 3 years. All other authors have nothing to declare

TK and SHK developed the study concept, ML, SJ, AMc, AR, JS, AG, CC, BT co-ordinated data collection, KS, SHK analysed the data, JJK undertook the main statistical analysis with tabulations produced by KS. KS, SHK prepared the manuscript. JJK was involved in substantial revisions of the manuscript. TK, ML, SJ, AMc, AR, JS, AG, CC, BT reviewed the manuscript, SHK is the guarantor for the project.

All authors, external and internal, had full access to all of the data (including statistical reports and tables) in the study and can take responsibility for the integrity of the data and the accuracy of the data analysis

Data sharing: all requests for data sharing to Professor SH Khoo (khoo@liv.ac.uk)

The Corresponding Author has the right to grant on behalf of all authors and does grant on behalf of all authors, an exclusive licence (or non exclusive for government employees) on a worldwide basis to the BMJ Publishing Group Ltd to permit this article (if accepted) to be published in BMJ editions and any other BMJ PGL products and sublicences such use and exploit all subsidiary rights, as set out in our licence

## References

1. Lewis PJ, Dornan T, Taylor D, Tully MP, Wass V, Ashcroft DM. Prevalence, incidence and nature of prescribing errors in hospital inpatients: a systematic review. *Drug Saf* 2009;32(5):379-89.
  2. Franklin BD, Reynolds M, Shebl NA, Burnett S, Jacklin A. Prescribing errors in hospital inpatients: a three-centre study of their prevalence, types and causes. *Postgrad Med J* 2011;87(1033):739-45.
  3. EQUIP final report. [http://www.gmc-uk.org/FINAL\\_Report\\_prevalence\\_and\\_causes\\_of\\_prescribing\\_errors.pdf](http://www.gmc-uk.org/FINAL_Report_prevalence_and_causes_of_prescribing_errors.pdf) 28935150.pdf
  4. Gleason KM, McDaniel MR, Feinglass J, Baker DW, Lindquist L, Liss D, et al. Results of the Medications at Transitions and Clinical Handoffs (MATCH) study: an analysis of medication reconciliation errors and risk factors at hospital admission. *J Gen Intern Med* 2010;25(5):441-7.
  5. Abramson EL, Bates DW, Jenter C, Volk LA, Barron Y, Quaresimo J, et al. Ambulatory prescribing errors among community-based providers in two states. *J Am Med Inform Assoc* 2011.
  6. The PRACTiCe Study (PRevalence And Causes of prescribing errors in general practiCe) A report for the GMC May 2012 [http://www.gmc-uk.org/Investigating\\_the\\_prevalence\\_and\\_causes\\_of\\_prescribing\\_errors\\_in\\_general\\_practice\\_The\\_PRACTiCe\\_study\\_Report\\_May\\_2012\\_48605085.pdf](http://www.gmc-uk.org/Investigating_the_prevalence_and_causes_of_prescribing_errors_in_general_practice_The_PRACTiCe_study_Report_May_2012_48605085.pdf)
  7. Davies EC, Green CF, Taylor S, Williamson PR, Mottram DR, Pirmohamed M. Adverse drug reactions in hospital in-patients: a prospective analysis of 3695 patient-episodes. *PLoS One* 2009;4(2):e4439.
  8. Drenth-van Maanen AC, Spee J, van Hensbergen L, Jansen PA, Egberts TC, van Marum RJ. Structured history taking of medication use reveals iatrogenic harm due to discrepancies in medication histories in hospital and pharmacy records. *J Am Geriatr Soc* 2011;59(10):1976-7.
  9. Reason J. Human error: models and management. *BMJ* 2000;320(7237):768-70.
  10. Dean B, Schachter M, Vincent C, Barber N. Causes of prescribing errors in hospital inpatients: a prospective study. *Lancet* 2002;359(9315):1373-8.
  11. Barber N, Rawlins M, Dean Franklin B. Reducing prescribing error: competence, control, and culture. *Qual Saf Health Care* 2003;12 Suppl 1:i29-32.
  12. Inside your Hospital: Dr. Foster Hospital Guide 2001-2011. Dr Foster Intelligence/Department of Health L, UK. Available from URL: [http://drfosterintelligence.co.uk/wp-content/uploads/2011/11/Hospital\\_Guide\\_2011.pdf](http://drfosterintelligence.co.uk/wp-content/uploads/2011/11/Hospital_Guide_2011.pdf), date last accessed 13/3/12.
  13. Hospital Patients 'More Likely to Die at Weekends' BBC News, London. Available from URL: <http://www.bbc.co.uk/news/health-15895663>, date last accessed 13/3/12.
  14. Agrawal A, Aronson JK, Britten N, Ferner RE, de Smet PA, Fialova D, et al. Medication errors: problems and recommendations from a consensus meeting. *Br J Clin Pharmacol* 2009;67(6):592-8.
  15. Callen J, McIntosh J, Li J. Accuracy of medication documentation in hospital discharge summaries: A retrospective analysis of medication transcription errors in manual and electronic discharge summaries. *Int J Med Inform* 2010;79(1):58-64.
  16. Likic R, Maxwell SR. Prevention of medication errors: teaching and training. *Br J Clin Pharmacol* 2009;67(6):656-61.
  17. Harding S, Britten N, Bristow D. The performance of junior doctors in applying clinical pharmacology knowledge and prescribing skills to standardized clinical cases. *Br J Clin Pharmacol* 2010;69(6):598-606.
  18. Goldacre MJ, Taylor K, Lambert TW. Views of junior doctors about whether their medical school prepared them well for work: questionnaire surveys. *BMC Med Educ* 2010;10:78.
  19. Tomorrow's Doctors, General medical Council, London, UK. February 2003. Available from URL: [http://www.gmc-uk.org/static/documents/content/TomorrowsDoctors\\_2003.pdf](http://www.gmc-uk.org/static/documents/content/TomorrowsDoctors_2003.pdf).
  20. Tomorrow's Doctors. General Medical Council, London UK. September 2009. Available from URL: [http://www.gmc-uk.org/static/documents/content/TomorrowsDoctors\\_2009.pdf](http://www.gmc-uk.org/static/documents/content/TomorrowsDoctors_2009.pdf)
- For peer review only - <http://bmjopen.bmj.com/site/about/guidelines.xhtml>

- 1
- 2
- 3 21. Dean B, Barber N, Schachter M. What is a prescribing error? *Qual Health Care* 2000;9(4):232-7.
- 4 22. Fernandez-Llamazares CM, Calleja-Hernandez MA, Manrique-Rodriguez S, Perez-Sanz C, Duran-
- 5 Garcia E, Sanjurjo-Saez M. Prescribing errors intercepted by clinical pharmacists in
- 6 paediatrics and obstetrics in a tertiary hospital in Spain. *Eur J Clin Pharmacol* 2012.
- 7 23. Scott GP, Shah P, Wyatt JC, Makubate B, Cross FW. Making electronic prescribing alerts more
- 8 effective: scenario-based experimental study in junior doctors. *J Am Med Inform Assoc*
- 9 2011;18(6):789-98.
- 10 24. Donyai P, O'Grady K, Jacklin A, Barber N, Franklin BD. The effects of electronic prescribing on the
- 11 quality of prescribing. *Br J Clin Pharmacol* 2008;65(2):230-7.
- 12 25. Westbrook JI, Reckmann M, Li L, Runciman WB, Burke R, Lo C, et al. Effects of two commercial
- 13 electronic prescribing systems on prescribing error rates in hospital in-patients: a before and
- 14 after study. *PLoS Med* 2012;9(1):e1001164.
- 15 26. Jani YH, Barber N, Wong IC. Republished error management: Paediatric dosing errors before and
- 16 after electronic prescribing. *Postgrad Med J* 2011;87(1030):565-8.
- 17 27. Nanji KC, Rothschild JM, Salzberg C, Keohane CA, Zigmont K, Devita J, et al. Errors associated with
- 18 outpatient computerized prescribing systems. *J Am Med Inform Assoc* 2011;18(6):767-73.
- 19 28. Klopotoska JE, Kuiper R, van Kan HJ, de Pont AC, Dijkgraaf MG, Lie AHL, et al. On-ward
- 20 participation of a hospital pharmacist in a Dutch intensive care unit reduces prescribing
- 21 errors and related patient harm: an intervention study. *Crit Care* 2010;14(5):R174.
- 22
- 23
- 24
- 25
- 26
- 27
- 28
- 29
- 30
- 31
- 32
- 33
- 34
- 35
- 36
- 37
- 38
- 39
- 40
- 41
- 42
- 43
- 44
- 45
- 46
- 47
- 48
- 49
- 50
- 51
- 52
- 53
- 54
- 55
- 56
- 57
- 58
- 59
- 60

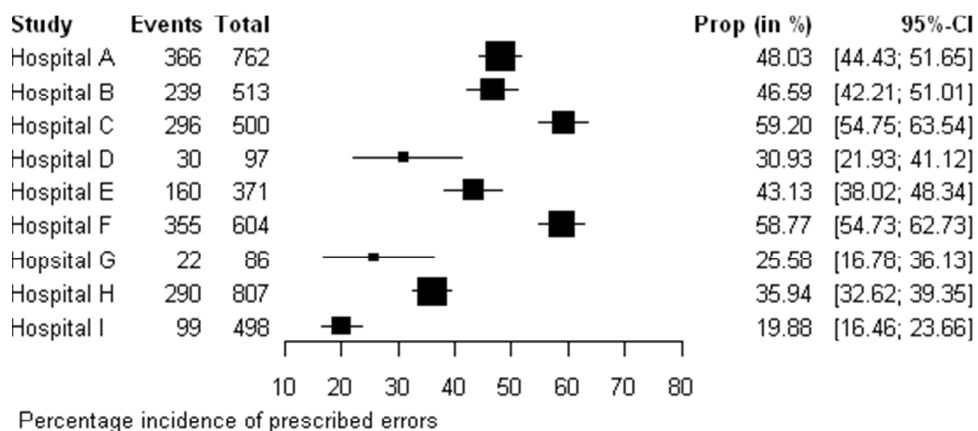

**Figure 1a.** Forest plot showing prescribing error rates in nine hospitals across North West England.

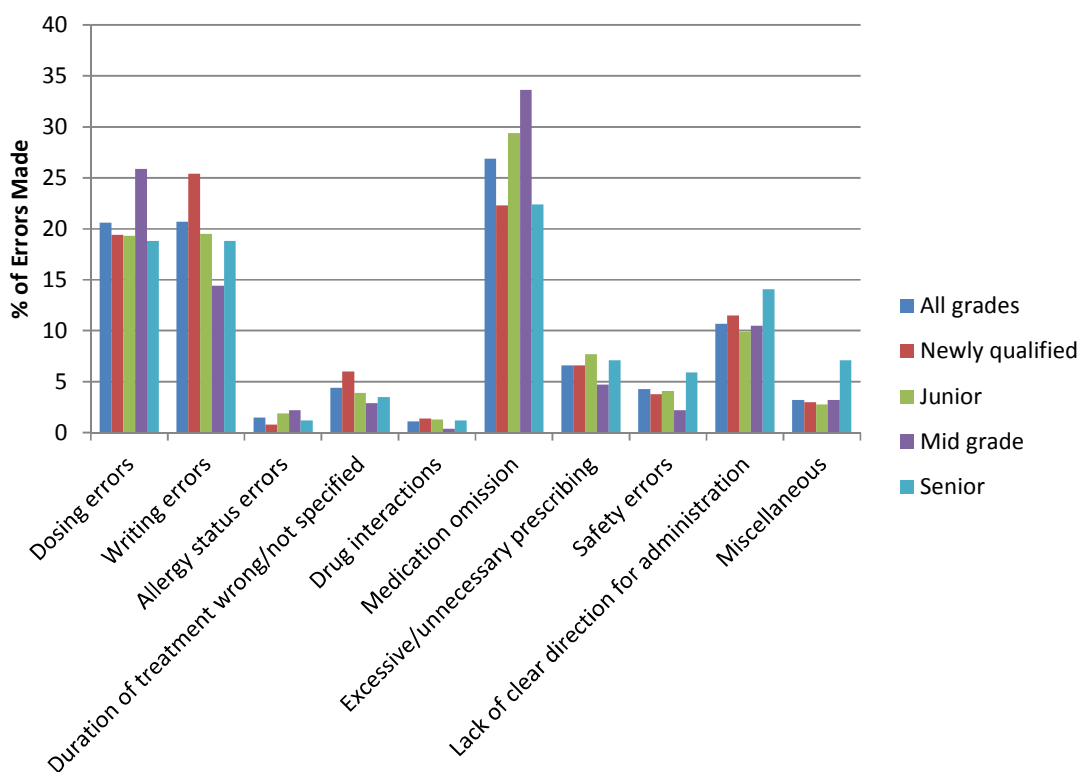

**Figure 2.** Categories of prescribing errors made by different grades of prescriber



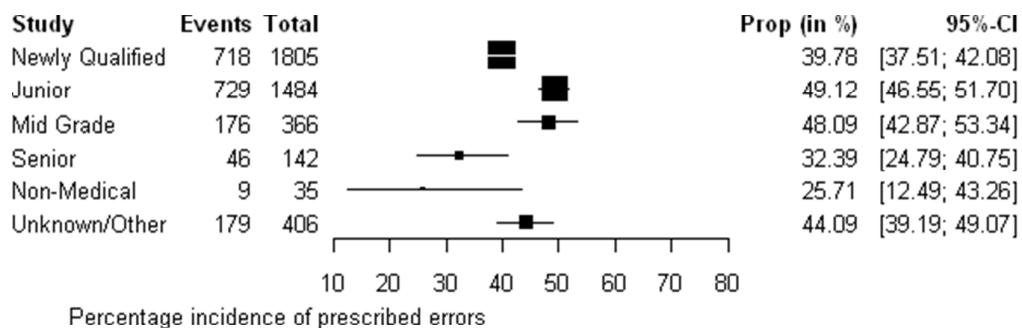

Figure 31b. Forest plot showing prescribing error rates made by different prescriber grades

peer review only

1  
2  
3  
4  
5  
6  
7  
8  
9  
10  
11  
12  
13  
14  
15  
16  
17  
18  
19  
20  
21  
22  
23  
24  
25  
26  
27  
28  
29  
30  
31  
32  
33  
34  
35  
36  
37  
38  
39  
40  
41  
42  
43  
44  
45  
46  
47  
48  
49  
50  
51  
52  
53  
54  
55  
56  
57  
58  
59  
60

**Table 1. Types of hospitals contributing prescription data**

| <u>Teaching Hospitals</u> | <u>District Hospitals</u> | <u>Specialist Hospitals<br/>(Women, Paediatrics,<br/>Mental Health)</u> |
|---------------------------|---------------------------|-------------------------------------------------------------------------|
| <u>Hospital A</u>         | <u>Hospital B</u>         | <u>Hospital D</u>                                                       |
| <u>Hospital C</u>         | <u>Hospital E</u>         | <u>Hospital G</u>                                                       |
| <u>Hospital H</u>         | <u>Hospital F</u>         | <u>Hospital I</u>                                                       |

For peer review only

1  
2 **Table 12.** Application of error categories and severity ratings for the Mersey Deanery Prescribing Audit

| Modified EQUIP Error Category                 | Original EQUIP Error Category                    | Includes/Excludes                                                                                                | Severity (EQUIP)                                                                                                                                                                                                                                                                                                                                                        | Severity Modification                                                                                                                                                      |
|-----------------------------------------------|--------------------------------------------------|------------------------------------------------------------------------------------------------------------------|-------------------------------------------------------------------------------------------------------------------------------------------------------------------------------------------------------------------------------------------------------------------------------------------------------------------------------------------------------------------------|----------------------------------------------------------------------------------------------------------------------------------------------------------------------------|
| 1. Dosing Errors                              | <del>2</del> -Underdose                          |                                                                                                                  | <b>Minor</b> if unable/unlikely to carry out (units); <b>Significant</b> if dose too low to treat the condition; <b>Serious</b> if patient in acute distress; <b>Potentially- Lethal</b> if medication life saving                                                                                                                                                      |                                                                                                                                                                            |
|                                               | <del>3</del> -Overdose                           | Excludes overdoses caused by duplication eg. Paracetamol with co-codamol ( <del>7</del> )                        | <b>Minor</b> if unable/unlikely to carry out (units); <b>Significant</b> - low TI, ½-4 times; <b>Serious</b> - Low TI, 4-10 times; errors in units if chance dose could be given; <b>Potentially- Lethal</b> if v.low TI and dose 10 times normal dose, results in serum levels of drug in severe toxicity range, or has high potential to cause cardiopulmonary arrest | <b>Minor</b> if effect of dosing expected to be minimal                                                                                                                    |
|                                               | <del>29</del> -Dose/rate mismatch                |                                                                                                                  | -                                                                                                                                                                                                                                                                                                                                                                       | Judgement used based on Equip severity categories                                                                                                                          |
| 2. Writing Errors                             | <del>4</del> - Strength/dose missing             | Includes dose units missing                                                                                      | <b>Minor</b>                                                                                                                                                                                                                                                                                                                                                            |                                                                                                                                                                            |
|                                               | <del>8</del> - Product/formulation not specified |                                                                                                                  | -                                                                                                                                                                                                                                                                                                                                                                       | <b>Minor</b>                                                                                                                                                               |
|                                               | <del>9</del> -Incorrect formulation              |                                                                                                                  | -                                                                                                                                                                                                                                                                                                                                                                       | <b>Minor</b> unless formulation likely to have implication on treatment eg. Insulin, co-careldopa, in which case <b>significant/serious</b> based on potential consequence |
|                                               | <del>12</del> - No signature                     |                                                                                                                  | -                                                                                                                                                                                                                                                                                                                                                                       | <b>Significant</b> (governance issue)                                                                                                                                      |
|                                               | <del>20</del> -Start date incorrect/missing      |                                                                                                                  | -                                                                                                                                                                                                                                                                                                                                                                       | <b>Minor</b>                                                                                                                                                               |
|                                               | <del>21</del> -CD requirements incorrect/missing |                                                                                                                  | -                                                                                                                                                                                                                                                                                                                                                                       | <b>Minor</b>                                                                                                                                                               |
| 3. Allergy status missing/significant allergy | <del>24</del> - Significant allergy              | Includes allergy status not completed, or where a drug has been prescribed despite an allergy to that drug/class | -                                                                                                                                                                                                                                                                                                                                                                       | <b>Significant</b> allergy status/specific allergy missed off prescription; <b>Serious</b> if patient prescribed agent allergic to; <b>Potentially- Lethal</b> if patient  |

|                                              |                                                                   |                                                                                                                                                                              |                                                                                                |                                                                                                                                                                                                                                                                                                                                   |
|----------------------------------------------|-------------------------------------------------------------------|------------------------------------------------------------------------------------------------------------------------------------------------------------------------------|------------------------------------------------------------------------------------------------|-----------------------------------------------------------------------------------------------------------------------------------------------------------------------------------------------------------------------------------------------------------------------------------------------------------------------------------|
|                                              |                                                                   |                                                                                                                                                                              |                                                                                                | prescribed drug which previously had severe reaction to eg. oedema                                                                                                                                                                                                                                                                |
| 4. Duration of treatment wrong/not specified | <del>18</del> . Continuation for longer than needed               | Includes no stop/review date for antibiotics, steroids etc                                                                                                                   | -                                                                                              | <b>Minor</b> if continuation of the medicine or the duration represents little potential for harm; <b>Significant</b> if continued >3 days longer than needed for medication such as: antibiotics, oral steroids, LMWH, potassium; <b>Serious</b> if ongoing treatment could cause serious harm                                   |
|                                              | <del>26</del> . Premature discontinuation                         | Includes drugs stopped without appropriate reducing course                                                                                                                   | -                                                                                              | <b>Minor</b> if discontinuation is unlikely to have a significant clinical impact; <b>Significant</b> if duration of treatment insufficient to treat condition eg. Antibiotics, or if no reducing course eg. Oral steroids                                                                                                        |
| 5. Drug Interactions                         | <del>22</del> . Drug interaction                                  | Excludes 2 items prescribed from same class e.g omeprazole with lansporazole ( <del>7</del> -Duplication)                                                                    | <b>Serious</b> if drug orders could exacerbate a patient's condition eg. Drug-drug interaction | <b>Significant</b> if manufacturer advises the combination is contraindicated, should be avoided, or advises caution; <b>Serious</b> if adverse events highly probable                                                                                                                                                            |
|                                              | <del>27</del> . Drug interaction not taken into account           | As above: unable to differentiate <a href="#">drug interaction<del>22</del></a> and <a href="#">drug interaction not taken into account<del>27</del></a> from available data |                                                                                                |                                                                                                                                                                                                                                                                                                                                   |
| 6. Omission of medication                    | <del>1</del> . Omission on admission                              |                                                                                                                                                                              | <b>Significant</b> (regular medication)                                                        | -                                                                                                                                                                                                                                                                                                                                 |
|                                              | <del>5</del> . Omission on <a href="#">discharge<del>10</del></a> |                                                                                                                                                                              | <b>Significant</b>                                                                             | -                                                                                                                                                                                                                                                                                                                                 |
|                                              | <del>17</del> . Drug not prescribed but indicated                 |                                                                                                                                                                              | -                                                                                              | <b>Minor</b> if medication is unlikely to significantly impact patient care; <b>Significant</b> if medication would have significant impact on clinical course <b>Serious</b> if medication would alleviate a serious condition /patient is in acute distress; <b>Potentially lethal</b> if medication is potentially life saving |
|                                              | <del>7</del> . Duplication                                        | Includes a second agent prescribed which contains an ingredient already                                                                                                      | <b>Minor</b> if duplicate therapy prescribed without potential for                             | <b>Significant, Serious, Potentially lethal:</b> As for overdose when duplicated items                                                                                                                                                                                                                                            |

1  
2  
3  
4  
5  
6  
7  
8  
9  
10  
11  
12  
13  
14  
15  
16  
17  
18  
19  
20  
21  
22  
23  
24  
25  
26  
27  
28  
29  
30  
31  
32  
33  
34  
35  
36  
37  
38  
39  
40  
41  
42  
43  
44  
45  
46  
47  
48  
49

|                                                |                                                               |                                                                                                                                                                                     |                                                                                                                                                                                          |                                                                                                                              |
|------------------------------------------------|---------------------------------------------------------------|-------------------------------------------------------------------------------------------------------------------------------------------------------------------------------------|------------------------------------------------------------------------------------------------------------------------------------------------------------------------------------------|------------------------------------------------------------------------------------------------------------------------------|
| 7. Excessive/<br>unnecessary<br>prescribing    |                                                               | being taken; 2 drugs prescribed from the same class/with same clinical effect eg. Lansoprazole + omeprazole                                                                         | increased adverse events                                                                                                                                                                 | co-administered (3)                                                                                                          |
|                                                | <del>11.</del> Unintentional prescription of drug             | Drug prescribed was not that desired. Includes prescription of a discontinued drug, excluding discontinuation due to ADR ( <del>25</del> ), or course is too long ( <del>18</del> ) | -                                                                                                                                                                                        | Judgement used based on Equip severity categories                                                                            |
| 8. <u>Clinical</u> Safety Errors               | <del>10.</del> No maximum dose                                | Excludes prescriptions with no frequency ( <del>6</del> -administration times missing/incorrect)                                                                                    | <b>Minor</b> - order lacked specific drug, dose, strength, frequency or route information                                                                                                | <b>Significant</b> if no maximum dose stated for opioids                                                                     |
|                                                | <del>13.</del> Clinical contraindication                      | Contraindication according to summary of product characteristics                                                                                                                    | <b>Serious</b> if drug orders could exacerbate a patient's condition eg. Drug-disease interaction                                                                                        | <b>Significant</b> if administration unlikely to have serious clinical consequences in the given situation                   |
|                                                | <del>25.</del> Continuation after ADR                         |                                                                                                                                                                                     | -                                                                                                                                                                                        | Judgement used based on Equip severity categories                                                                            |
|                                                | <del>28.</del> No dosage alteration after levels out of range |                                                                                                                                                                                     | -                                                                                                                                                                                        | Judgement used based on Equip severity categories                                                                            |
| 9. Lack of clear directions for administration | <del>6.</del> Administration times incorrect/missing          | No frequency/times of dosing incorrect eg. In relation to food, morning vs night.                                                                                                   | <b>Minor</b>                                                                                                                                                                             | <b>Significant</b> if administration time would be expected to affect treatment eg. Exenatide with meals, hypnotics at night |
|                                                | <del>14.</del> Incorrect route                                |                                                                                                                                                                                     | <b>Minor</b> if unlikely to be carried out/little chance of toxicity/therapeutic failure; <b>Significant</b> if wrong route to treat condition; <b>Serious</b> if potential for toxicity | -                                                                                                                            |
|                                                | <del>16.</del> IV instructions incorrect/missing              |                                                                                                                                                                                     | -                                                                                                                                                                                        | Judgement used based on Equip severity categories                                                                            |
|                                                | <del>19.</del> Route missing                                  |                                                                                                                                                                                     | <b>Minor</b> - order lacked specific drug, dose, strength, frequency or route information                                                                                                | -                                                                                                                            |
|                                                | <del>23.</del> Daily dose divided incorrectly                 | Number of dosing intervals incorrect. Excludes under/overdose ( <del>2/3</del> )                                                                                                    | -                                                                                                                                                                                        | <b>Minor</b> if dosing intervals are not standard, but are unlikely to significantly affect treatment;                       |

1  
2  
3  
4  
5  
6  
7  
8  
9  
10  
11  
12  
13  
14  
15  
16  
17  
18  
19  
20  
21  
22  
23  
24  
25  
26  
27  
28  
29  
30  
31  
32  
33  
34  
35  
36  
37  
38  
39  
40  
41  
42  
43  
44  
45  
46  
47  
48  
49

|                          |                              |                                                                                                                                                                       |   |                                                                                                                                                                                                                                      |
|--------------------------|------------------------------|-----------------------------------------------------------------------------------------------------------------------------------------------------------------------|---|--------------------------------------------------------------------------------------------------------------------------------------------------------------------------------------------------------------------------------------|
|                          |                              |                                                                                                                                                                       |   | <b>Significant</b> if dosing intervals are inappropriate to treat the condition; <b>Serious</b> if medication has narrow <b>TItherapeutic index</b> and dosing intervals may affect toxicity/efficacy eg. Parenteral aminoglycosides |
| <b>10. Miscellaneous</b> | <del>15.</del> No indication | Includes PRN medications, where lack of indication on prescription could prevent administration. Excludes failure to write an indication when prescribing antibiotics | - | <b>Minor</b> if indication not written up for PRN medication; <b>Significant</b> if indication not written up for formulations which are licensed for specific conditions.                                                           |
|                          | <del>30.</del> Miscellaneous | Illegible drug details, non-standard abbreviations, patient details incorrect/missing, warfarin fixed dose prescribed.                                                | - | Judgement used based on Equip severity categories                                                                                                                                                                                    |

Abbreviations: TI- therapeutic index, CD- controlled drug, ADR- adverse drug reaction, PRN- when required

Table 32. Summary data showing prevalence and severity of errors observed

|                             |                 | Total Prescriptions | One or more error reported |                        | Error Severity         |                        |                      |                        | Total errors |
|-----------------------------|-----------------|---------------------|----------------------------|------------------------|------------------------|------------------------|----------------------|------------------------|--------------|
|                             |                 |                     | No (%)                     | Yes (%)                | Minor (%)              | Significant (%)        | Serious (%)          | Potentially Lethal (%) |              |
| <b>All</b>                  |                 | <b>4238</b>         | <b>2381<br/>(56.2)</b>     | <b>1857<br/>(43.8)</b> | <b>1264<br/>(42.0)</b> | <b>1629<br/>(54.1)</b> | <b>109<br/>(3.6)</b> | <b>9<br/>(0.3)</b>     | <b>3011</b>  |
| <b>Prescriber Grade</b>     | Newly Qualified | 1805                | 1087<br>(60.2)             | 718<br>(39.8)          | 519<br>(48.8)          | 507<br>(47.7)          | 35<br>(3.3)          | 3<br>(0.3)             | 1064         |
|                             | Junior          | 1484                | 755<br>(50.9)              | 729<br>(49.1)          | 496<br>(39.2)          | 725<br>(57.4)          | 41<br>(3.2)          | 2<br>(0.2)             | 1264         |
|                             | Mid Grade       | 366                 | 190<br>(51.9)              | 176<br>(48.1)          | 93<br>(33.6)           | 166<br>(59.9)          | 15<br>(5.4)          | 3<br>(1.1)             | 277          |
|                             | Senior          | 142                 | 96<br>(67.6)               | 46<br>(32.4)           | 36<br>(42.4)           | 43<br>(50.6)           | 6<br>(7.1)           | 0<br>(0)               | 85           |
|                             | Non-medical     | 35                  | 26<br>(74.3)               | 9<br>(25.7)            | 8<br>(57.1)            | 5<br>(35.7)            | 1<br>(7.1)           | 0<br>(0)               | 14           |
|                             | unknown/other   | 406                 | 227<br>(55.9)              | 179<br>(44.1)          | 112<br>(36.5)          | 183<br>(59.6)          | 11<br>(3.6)          | 1<br>(0.3)             | 307          |
| <b>Training</b>             | Liverpool       | 1290                | 787<br>(61.0)              | 503<br>(39.0)          | 270<br>(35.4)          | 456<br>(59.8)          | 36<br>(4.7)          | 1<br>(0.1)             | 763          |
|                             | Non-Liverpool   | 922                 | 478<br>(51.8)              | 444<br>(48.2)          | 342<br>(43.8)          | 420<br>(53.8)          | 19<br>(2.4)          | 0<br>(0)               | 781          |
|                             | Unknown         | 2026                | 1118<br>(55.2)             | 908<br>(44.8)          | 652<br>(44.4)          | 753<br>(51.3)          | 54<br>(3.7)          | 8<br>(0.5)             | 1467         |
| <b>Admission/ Discharge</b> | Discharge       | 2467                | 1615<br>(65.5)             | 852<br>(34.5)          | 685<br>(52.5)          | 584<br>(44.8)          | 32<br>(2.5)          | 4<br>(0.3)             | 1305         |
|                             | Admission       | 1744                | 756<br>(43.4)              | 988<br>(56.7)          | 576<br>(34.2)          | 1030<br>(61.1)         | 75<br>(4.4)          | 5<br>(0.3)             | 1686         |
|                             | Unknown         | 27                  | 12<br>(44.44)              | 15<br>(55.55)          | 3<br>(15)              | 15<br>(75)             | 2<br>(10)            | 0<br>(0)               | 20           |
| <b>Ward Area</b>            | Medicine        | 2059                | 1083<br>(52.6)             | 976<br>(47.4)          | 634<br>(39.0)          | 921<br>(56.7)          | 64<br>(3.9)          | 6<br>(0.37)            | 1625         |

1  
2  
3  
4  
5  
6  
7  
8  
9  
10  
11  
12  
13  
14  
15  
16  
17  
18  
19  
20  
21  
22  
23  
24  
25  
26  
27  
28  
29  
30  
31  
32  
33  
34  
35  
36  
37  
38  
39  
40  
41  
42  
43  
44  
45  
46  
47  
48  
49

|                        |                          |      |               |                                               |               |               |             |            |     |
|------------------------|--------------------------|------|---------------|-----------------------------------------------|---------------|---------------|-------------|------------|-----|
|                        | Surgery                  | 1395 | 836<br>(59.9) | 559<br>(40.1)                                 | 448<br>(50.1) | 417<br>(46.6) | 27<br>(3.0) | 2<br>(0.2) | 894 |
|                        | Mental health            | 96   | 66<br>(68.8)  | 30<br>(31.3)                                  | 24<br>(60)    | 16<br>(40)    | 0<br>(0)    | 0<br>(0)   | 40  |
|                        | Accident & Emergency A&E | 8    | 1<br>(12.5)   | 7<br>(87.5)                                   | 1<br>(9.1)    | 10<br>(90.9)  | 0<br>(0)    | 0<br>(0)   | 11  |
|                        | Critical care            | 17   | 14<br>(82.4)  | 3<br>(17.7)                                   | 1<br>(25.0)   | 3<br>(75.0)   | 0<br>(0)    | 0<br>(0)   | 4   |
|                        | Unknown                  | 663  | 383<br>(57.8) | 280<br>(42.2)                                 | 156<br>(35.7) | 262<br>(60.0) | 18<br>(4.1) | 1<br>(0.2) | 437 |
| Prescription contains# | Antibiotic               | 724  | 301<br>(41.6) | 423 (58.4)<br><b>(Antibiotic: 130 (18.0))</b> | 57<br>(29.8)  | 118<br>(61.8) | 16<br>(8.4) | 0<br>(0)   | 191 |
|                        | Insulin                  | 129  | 42<br>(32.6)  | 87 (67.4)<br><b>Insulin: 20 (15.5)</b>        | 12<br>(37.5)  | 19<br>(59.4)  | 1<br>(3.1)  | 0<br>(0)   | 32  |
|                        | Warfarin                 | 196  | 71<br>(36.2)  | 125 (63.8)<br><b>Warfarin: 18 (9.2)</b>       | 6<br>(23.1)   | 16<br>(61.5)  | 4<br>(15.4) | 0<br>(0)   | 26  |
|                        | Oxygen                   | 36   | 7<br>(19.4)   | 29 (80.6)<br><b>Oxygen: 2 (5.6)</b>           | 1<br>(14.3)   | 5<br>(71.4)   | 1<br>(14.3) | 0<br>(0)   | 7   |

\* Relates to errors per prescriptions written, not errors per number of items prescribed  
 # Error severities, total errors and error rates relate to errors associated with Antibiotics/Insulin/Warfarin/Oxygen only



**Table 43.** Summary of the Errors Observed which were Considered to be Potentially Lethal

| Error Description                                                                                                | Category                                       | Prescriber Grade | Ward Area | Admission/ Discharge |
|------------------------------------------------------------------------------------------------------------------|------------------------------------------------|------------------|-----------|----------------------|
| Gliclazide 400mg prescribed when 40mg needed                                                                     | 1- Dosing Errors                               | Newly qualified  | Medicine  | Discharge            |
| Digoxin 625micrograms prescribed when 62.5micrograms needed                                                      | 1- Dosing Errors                               | Newly qualified  | Medicine  | Discharge            |
| Oxycodone 500mg prescribed: overdose                                                                             | 1- Dosing Errors                               | Mid Grade        | Surgery   | Admission            |
| Methotrexate prescribed daily, not weekly                                                                        | 1- Dosing Errors                               | Junior           | Medicine  | Admission            |
| Doxazocin prescribed; had been stopped by <a href="#">general practitioner</a> GP due to angioedema              | 3. Allergy status missing/ significant allergy | Junior           | Medicine  | Admission            |
| Phenytoin dose of 300mg daily incorrectly prescribed as 800mg                                                    | 1- Dosing Errors                               | Newly Qualified  | Medicine  | Discharge            |
| Midazolam IV for sedation: overdose                                                                              | 1- Dosing Errors                               | Mid Grade        | Unknown   | Admission            |
| Amiodarone loading dose of 200mg three times daily continued as a regular dose                                   | 1- Dosing Errors                               | Other            | Surgery   | Discharge            |
| Enoxaparin prescribed 1mg/kg once daily instead of 1mg/kg twice daily for a patient with acute coronary syndrome | 1- Dosing Errors                               | Mid Grade        | Medicine  | Admission            |

**Table 54.** Univariate statistics showing the significance of explanatory variables in predicting error rates in prescriptions.

| Variable                                                     | n    | ≥1 Error<br>n (%)     | No Error<br>n (%)    | Difference (95%CI)       | p-value |
|--------------------------------------------------------------|------|-----------------------|----------------------|--------------------------|---------|
| Prescriber Grade (n=3850)                                    |      | n=1689                | n=2161               |                          |         |
| <i>Newly qualified</i>                                       | 1803 | 716 (42%)             | 1087 (50%)           | -8% (-11.2% to -4.8%)    | <0.001  |
| <i>Junior</i>                                                | 1482 | 727 (43%)             | 755 (35%)            | 8% (4.9% to 11.1%)       |         |
| <i>Mid-grade</i>                                             | 366  | 176 (10%)             | 190 (8.8%)           | 1.2% (-0.7% to 3.1%)     |         |
| <i>Senior</i>                                                | 142  | 46 (2.7%)             | 96 (4.4%)            | -1.7% (-2.8% to -0.4%)   |         |
| <i>Non-medical</i>                                           | 35   | 9 (0.5%)              | 26 (1.2%)            | -0.7% (-1.3% to -0.1%)   |         |
| <i>Other</i>                                                 | 22   | 15 (0.9%)             | 7 (0.3%)             | 0.56% (0.1% to 1.1%)     |         |
| <u>Discharge/Admission</u><br>(n=3065)                       |      | n=1135                | n=1930               |                          |         |
| <u>Discharge</u>                                             | 2467 | 853 (75%)             | 1614 (84%)           | -9% (-12.0% to -6.0%)    | <0.001  |
| Admission                                                    | 598  | 282 (25%)             | 316 (16%)            |                          |         |
| Liverpool trained (n=1325)                                   |      | n=518                 | n=807                |                          |         |
| <i>Liverpool</i>                                             | 35   | 14 (2.7%)             | 21 (2.6%)            | 0.1% (-1.7% to 1.9%)     | 0.911   |
| <i>Non-Liverpool</i>                                         | 1290 | 504 (97%)             | 786 (97%)            |                          |         |
| Hospital (n=4238)                                            |      | n=1857                | n=2381               |                          |         |
| <i>Hospital A</i>                                            | 762  | 366 (20%)             | 396 (17%)            | 3% (0.6% to 5.4%)        | <0.001  |
| <i>Hospital B</i>                                            | 513  | 239 (12%)             | 274 (12%)            | 0% (-2.0% to 2.0%)       |         |
| <i>Hospital C</i>                                            | 500  | 296 (16%)             | 204 (8.6%)           | 7.4% (5.4% to 9.4%)      |         |
| <i>Hospital D</i>                                            | 97   | 30 (1.6%)             | 67 (2.8%)            | -1.2% (-2.1% to -0.3%)   |         |
| <i>Hospital E</i>                                            | 371  | 160 (8.6%)            | 211 (8.9%)           | -0.3% (-2.0% to 1.4%)    |         |
| <i>Hospital F</i>                                            | 604  | 355 (19%)             | 249 (10%)            | 9% (6.8% to 11.2%)       |         |
| <i>Hospital G</i>                                            | 86   | 22 (1.2%)             | 64 (2.7%)            | -1.5% (-2.3% to -0.7%)   |         |
| <i>Hospital H</i>                                            | 807  | 290 (16%)             | 517 (22%)            | -6% (-8.4% to -3.6%)     |         |
| <i>Hospital I</i>                                            | 498  | 99 (5.3%)             | 399 (17%)            | -11.7% (-13.5% to -9.9%) |         |
| Ward Area (n=3575)                                           |      | n=1577                | n=1998               |                          |         |
| <i>Medical</i>                                               | 2059 | 977 (62%)             | 1082 (54%)           | 8% (4.8% to 11.2%)       | <0.001  |
| <i>Surgical</i>                                              | 1395 | 560 (36%)             | 835 (42%)            | -6% (-9.2% to -2.8%)     |         |
| <i>Accident &amp; Emergency</i>                              | 8    | 7 (0.4%)              | 1 (0.1%)             | 0.3% (-0.04% to 0.6%)    |         |
| <i>Mental health</i>                                         | 96   | 30 (1.9%)             | 66 (3.3%)            | -1.4% (-2.4% to -0.4%)   |         |
| <i>Critical care</i>                                         | 17   | 3 (0.2%)              | 14 (0.7%)            | -0.5% (-0.9% to -0.1%)   |         |
| Number of Medicines on Prescription (n=3386)<br>Median (IQR) |      | 8; (4,11)<br>(n=1435) | 4; (2,7)<br>(n=1951) | -4 (-4.5, -3.5)          | <0.001  |

n= number of prescriptions

**Table 65.** Multivariate logistic regression analysis for predicting error rates in prescriptions.

| Variable                          | Odds ratio (95%CI)  | p-value |
|-----------------------------------|---------------------|---------|
| <b>Hospital</b>                   |                     |         |
| <i>Hospital H</i>                 | 1                   |         |
| <i>Hospital A</i>                 | Not estimable*      |         |
| <i>Hospital B</i>                 | 1.11 (0.78 to 1.58) | 0.57    |
| <i>Hospital C</i>                 | 2.38 (1.63 to 3.46) | <0.001  |
| <i>Hospital D</i>                 | 0.64 (0.13 to 3.06) | 0.57    |
| <i>Hospital E</i>                 | 1.39 (0.96 to 2.01) | 0.08    |
| <i>Hospital F</i>                 | 3.53 (2.63 to 4.73) | <0.001  |
| <i>Hospital G</i>                 | 1.80 (1.03 to 3.12) | 0.04    |
| <i>Hospital I</i>                 | 1.11 (0.73 to 1.70) | 0.62    |
| <b>Prescriber Grade</b>           |                     |         |
| <i>Newly qualified</i>            | 1                   |         |
| <i>Junior</i>                     | 1.06 (0.85 to 1.32) | 0.61    |
| <i>Mid-grade</i>                  | 0.96 (0.64 to 1.44) | 0.83    |
| <i>Senior</i>                     | 0.97 (0.58 to 1.63) | 0.92    |
| <i>Non-medical</i>                | 0.59 (0.21 to 1.64) | 0.31    |
| <i>Other</i>                      | 1.50 (0.53 to 4.23) | 0.44    |
| <b>Discharge/Admission</b>        | 1.16 (0.70 to 1.92) | 0.58    |
| <b>Number of prescribed items</b> | 1.14 (1.12 to 1.17) | <0.001  |

Analysis contains only 2127 records (50.2%) where complete data was provided for all variables

\* Trust provided no data on number of prescription items



1  
2  
3  
4  
5  
6  
7 TO: Editor  
8 BMJ Open

Professor S H Khoo, MD, FRCP, DTM&H  
Department of Pharmacology & Therapeutics

Pharmacology Research Laboratories  
Block H, First Floor  
70 Pembroke Place  
Liverpool  
L69 3GF

T 0151 794 5560  
F 0151 794 5656  
E khoo@liverpool.ac.uk

31st August 2012.

9  
10  
11  
12  
13  
14  
15  
16  
17  
18  
19  
20  
21 Dear Editor

22  
23 **Re: Cross Sectional Study of Prescribing Error in Patients Admitted to Nine Hospitals Across North**  
24 **West England**  
25

26  
27 Please find enclosed our manuscript for your consideration. The BMJ Group Journals have a long and  
28 honourable tradition of championing patient safety, and publishing research which seeks to  
29 characterise, understand and limit harms resulting from medication error. Earlier this year, Ingrid  
30 Torjesen's article highlighted findings from two of the UK's largest studies into prescribing error in  
31 primary and secondary care (the PRACTiCe and EQUIP studies respectively) [Torjesen *I. BMJ* 2 May  
32 2012]. Both studies have released study reports on the GMC website, but neither has yet been  
33 published in a peer-reviewed journal.  
34

35  
36 Our sample size is comparable to EQUIP, and larger than PRACTiCe, and our observed error rate of  
37 ~10% of medication items prescribed is similar to EQUIP (9%) and PRACTiCe (4%), using a modified  
38 version of EQUIP definitions. By analysing error within complete individual prescriptions (rather than  
39 individual medication items) we show that a significant proportion of patients were exposed to  
40 prescribing error, and that this risk increased by 14% for every medication item added to their  
41 prescription. Risk of error did not vary with hospital, seniority of prescriber or medical school  
42 training, but acute medical admission scenarios were associated with highest risk of error (mainly  
43 arising from unintended medication omission). Finally, electronic prescribing and medication  
44 administration systems could only have prevented up to a quarter of these errors, highlighting the  
45 important role of the ward pharmacist, particularly in high-pressure acute areas.  
46  
47

48  
49 We believe these results are likely to accurately reflect the prevalence of prescribing error more  
50 generally throughout the UK, and to consequently inform health policy which seeks to minimise  
51 patient harms through improvements in health systems. Thank you for considering this for  
52 publication in BMJ Open.  
53

54  
55 With best wishes,

56  
57 A handwritten signature in blue ink, appearing to be 'S.H. Khoo'.

58  
59 Professor S.H. Khoo  
60 Institute of Translational Medicine  
University of Liverpool

STROBE Statement—Checklist of items that should be included in reports of *cross-sectional studies*

|                              | Item No | Recommendation                                                                                                                                                                                               |     |
|------------------------------|---------|--------------------------------------------------------------------------------------------------------------------------------------------------------------------------------------------------------------|-----|
| <b>Title and abstract</b>    | 1       | (a) Indicate the study's design with a commonly used term in the title or the abstract                                                                                                                       | √   |
|                              |         | (b) Provide in the abstract an informative and balanced summary of what was done and what was found                                                                                                          | √   |
| <b>Introduction</b>          |         |                                                                                                                                                                                                              |     |
| Background/rationale         | 2       | Explain the scientific background and rationale for the investigation being reported                                                                                                                         | √   |
| Objectives                   | 3       | State specific objectives, including any prespecified hypotheses                                                                                                                                             | √   |
| <b>Methods</b>               |         |                                                                                                                                                                                                              |     |
| Study design                 | 4       | Present key elements of study design early in the paper                                                                                                                                                      | √   |
| Setting                      | 5       | Describe the setting, locations, and relevant dates, including periods of recruitment, exposure, follow-up, and data collection                                                                              | √   |
| Participants                 | 6       | (a) Give the eligibility criteria, and the sources and methods of selection of participants                                                                                                                  | √   |
| Variables                    | 7       | Clearly define all outcomes, exposures, predictors, potential confounders, and effect modifiers. Give diagnostic criteria, if applicable                                                                     | √   |
| Data sources/<br>measurement | 8*      | For each variable of interest, give sources of data and details of methods of assessment (measurement). Describe comparability of assessment methods if there is more than one group                         | √   |
| Bias                         | 9       | Describe any efforts to address potential sources of bias                                                                                                                                                    | √   |
| Study size                   | 10      | Explain how the study size was arrived at                                                                                                                                                                    | √   |
| Quantitative variables       | 11      | Explain how quantitative variables were handled in the analyses. If applicable, describe which groupings were chosen and why                                                                                 | √   |
| Statistical methods          | 12      | (a) Describe all statistical methods, including those used to control for confounding                                                                                                                        | √   |
|                              |         | (b) Describe any methods used to examine subgroups and interactions                                                                                                                                          | √   |
|                              |         | (c) Explain how missing data were addressed                                                                                                                                                                  | √   |
|                              |         | (d) If applicable, describe analytical methods taking account of sampling strategy                                                                                                                           | √   |
|                              |         | (e) Describe any sensitivity analyses                                                                                                                                                                        | √   |
| <b>Results</b>               |         |                                                                                                                                                                                                              |     |
| Participants                 | 13*     | (a) Report numbers of individuals at each stage of study—eg numbers potentially eligible, examined for eligibility, confirmed eligible, included in the study, completing follow-up, and analysed            | n/a |
|                              |         | (b) Give reasons for non-participation at each stage                                                                                                                                                         | n/a |
|                              |         | (c) Consider use of a flow diagram                                                                                                                                                                           | n/a |
| Descriptive data             | 14*     | (a) Give characteristics of study participants (eg demographic, clinical, social) and information on exposures and potential confounders                                                                     | √   |
|                              |         | (b) Indicate number of participants with missing data for each variable of interest                                                                                                                          | √   |
| Outcome data                 | 15*     | Report numbers of outcome events or summary measures                                                                                                                                                         | √   |
| Main results                 | 16      | (a) Give unadjusted estimates and, if applicable, confounder-adjusted estimates and their precision (eg, 95% confidence interval). Make clear which confounders were adjusted for and why they were included | √   |

|                          |    |                                                                                                                                                                            |   |
|--------------------------|----|----------------------------------------------------------------------------------------------------------------------------------------------------------------------------|---|
|                          |    | (b) Report category boundaries when continuous variables were categorized                                                                                                  | √ |
|                          |    | (c) If relevant, consider translating estimates of relative risk into absolute risk for a meaningful time period                                                           | √ |
| Other analyses           | 17 | Report other analyses done—eg analyses of subgroups and interactions, and sensitivity analyses                                                                             | √ |
| <b>Discussion</b>        |    |                                                                                                                                                                            |   |
| Key results              | 18 | Summarise key results with reference to study objectives                                                                                                                   | √ |
| Limitations              | 19 | Discuss limitations of the study, taking into account sources of potential bias or imprecision. Discuss both direction and magnitude of any potential bias                 | √ |
| Interpretation           | 20 | Give a cautious overall interpretation of results considering objectives, limitations, multiplicity of analyses, results from similar studies, and other relevant evidence | √ |
| Generalisability         | 21 | Discuss the generalisability (external validity) of the study results                                                                                                      | √ |
| <b>Other information</b> |    |                                                                                                                                                                            |   |
| Funding                  | 22 | Give the source of funding and the role of the funders for the present study and, if applicable, for the original study on which the present article is based              | √ |

\*Give information separately for exposed and unexposed groups.

**Note:** An Explanation and Elaboration article discusses each checklist item and gives methodological background and published examples of transparent reporting. The STROBE checklist is best used in conjunction with this article (freely available on the Web sites of PLoS Medicine at <http://www.plosmedicine.org/>, Annals of Internal Medicine at <http://www.annals.org/>, and Epidemiology at <http://www.epidem.com/>). Information on the STROBE Initiative is available at [www.strobe-statement.org](http://www.strobe-statement.org).



## Cross Sectional Study of Prescribing Errors in Patients Admitted to Nine Hospitals Across North West England

|                                 |                                                                                                                                                                                                                                                                                                                                                                                                                                                                                                                                                                                                                                                                                                                                                                                                                                                                                                                                                                                                                                                                                                                                                                                                                                                                                                  |
|---------------------------------|--------------------------------------------------------------------------------------------------------------------------------------------------------------------------------------------------------------------------------------------------------------------------------------------------------------------------------------------------------------------------------------------------------------------------------------------------------------------------------------------------------------------------------------------------------------------------------------------------------------------------------------------------------------------------------------------------------------------------------------------------------------------------------------------------------------------------------------------------------------------------------------------------------------------------------------------------------------------------------------------------------------------------------------------------------------------------------------------------------------------------------------------------------------------------------------------------------------------------------------------------------------------------------------------------|
| Journal:                        | <i>BMJ Open</i>                                                                                                                                                                                                                                                                                                                                                                                                                                                                                                                                                                                                                                                                                                                                                                                                                                                                                                                                                                                                                                                                                                                                                                                                                                                                                  |
| Manuscript ID:                  | bmjopen-2012-002036.R2                                                                                                                                                                                                                                                                                                                                                                                                                                                                                                                                                                                                                                                                                                                                                                                                                                                                                                                                                                                                                                                                                                                                                                                                                                                                           |
| Article Type:                   | Research                                                                                                                                                                                                                                                                                                                                                                                                                                                                                                                                                                                                                                                                                                                                                                                                                                                                                                                                                                                                                                                                                                                                                                                                                                                                                         |
| Date Submitted by the Author:   | 13-Dec-2012                                                                                                                                                                                                                                                                                                                                                                                                                                                                                                                                                                                                                                                                                                                                                                                                                                                                                                                                                                                                                                                                                                                                                                                                                                                                                      |
| Complete List of Authors:       | Seden, Kay; University of Liverpool, Faculty of Health & Life Sciences; Royal Liverpool and Broadgreen University Hospital Trust, NIHR Biomedical Research Centre<br>Kirkham, Jamie; University of Liverpool, Department of Biostatistics<br>Kennedy, Tom; University of Liverpool, Faculty of Health & Life Sciences<br>Lloyd, Michael; Whiston Hospital- St Helens and Knowsley Teaching Hospitals NHS Trust, Pharmacy Department<br>James, Sally; Royal Liverpool and Broadgreen University Hospitals NHS Trust, Pharmacy Department<br>McManus, Aine; Royal Liverpool and Broadgreen University Hospitals NHS Trust, Pharmacy Department<br>Ritchings, Andrew; Mid Cheshire Hospitals NHS Foundation Trust, Pharmacy Department<br>Simpson, Jennifer; Warrington and Halton Hospitals NHS Foundation Trust, Pharmacy Department<br>Thornton, Dave; Aintree University Hospitals NHS Foundation Trust, Pharmacy Department<br>Gill, Andrea; Alder Hey Children's Hospital NHS Foundation Trust, Pharmacy Department<br>Coleman, Carolyn; Nobles Hospital, Douglas, Isle of Man, Pharmacy Department<br>Thorpe, Bethan; Cheshire and Wirral Partnership NHS Foundation Trust, Pharmacy Department<br>Khoo, Saye; University of Liverpool, Faculty of Health & Life Sciences; Univ of Liverpool |
| <b>Primary Subject Heading</b>: | Health services research                                                                                                                                                                                                                                                                                                                                                                                                                                                                                                                                                                                                                                                                                                                                                                                                                                                                                                                                                                                                                                                                                                                                                                                                                                                                         |
| Secondary Subject Heading:      | Health services research                                                                                                                                                                                                                                                                                                                                                                                                                                                                                                                                                                                                                                                                                                                                                                                                                                                                                                                                                                                                                                                                                                                                                                                                                                                                         |
| Keywords:                       | EDUCATION & TRAINING (see Medical Education & Training), Quality in health care < HEALTH SERVICES ADMINISTRATION & MANAGEMENT, Risk management < HEALTH SERVICES ADMINISTRATION & MANAGEMENT                                                                                                                                                                                                                                                                                                                                                                                                                                                                                                                                                                                                                                                                                                                                                                                                                                                                                                                                                                                                                                                                                                     |
|                                 |                                                                                                                                                                                                                                                                                                                                                                                                                                                                                                                                                                                                                                                                                                                                                                                                                                                                                                                                                                                                                                                                                                                                                                                                                                                                                                  |

1  
2  
3  
4 **Cross Sectional Study of Prescribing Errors in Patients Admitted to Nine Hospitals**  
5 **Across North West England**  
6

7  
8  
9 Seden K<sup>1,2</sup>, Kirkham JJ<sup>3</sup>, Kennedy T<sup>2</sup>, Lloyd M<sup>4</sup>, James S<sup>5</sup>, Mcmanus A<sup>5</sup>, Ritchings A<sup>6</sup>,  
10 Simpson J<sup>7</sup>, Thornton D<sup>8</sup>, Gill A<sup>9</sup>, Coleman C<sup>10</sup>, Thorpe B<sup>11</sup>, Khoo SH<sup>1,2</sup>  
11

12  
13  
14 NIHR Biomedical Research Centre, Royal Liverpool and Broadgreen University Hospital  
15 Trust, Liverpool, UK<sup>1</sup>; Faculty of Health & Life Sciences, University of Liverpool, Liverpool,  
16 UK<sup>2</sup>; Department of Biostatistics, University of Liverpool, Liverpool, UK<sup>3</sup>; Pharmacy  
17 Department, Whiston Hospital- St Helens and Knowsley Teaching Hospitals NHS Trust,  
18 Whiston, UK<sup>4</sup>; Pharmacy Department, Royal Liverpool and Broadgreen University Hospitals  
19 NHS Trust, Liverpool, UK<sup>5</sup>; Pharmacy Department, Mid Cheshire Hospitals NHS Foundation  
20 Trust, Cheshire, UK<sup>6</sup>; Pharmacy Department, Warrington and Halton Hospitals NHS  
21 Foundation Trust, Warrington, UK<sup>7</sup>; Pharmacy Department, Aintree University Hospitals  
22 NHS Foundation Trust, Liverpool, UK<sup>8</sup>; Pharmacy Department, Alder Hey Children's Hospital  
23 NHS Foundation Trust, Liverpool, UK<sup>9</sup>; Pharmacy Department, Nobles Hospital, Douglas,  
24 Isle of Man, UK<sup>10</sup>; Pharmacy Department, Cheshire and Wirral Partnership NHS Foundation  
25 Trust, Wirral, UK<sup>11</sup>  
26  
27  
28  
29  
30  
31

32 Corresponding Author: Saye Khoo  
33 Pharmacology Research Laboratories  
34 H Block, 1<sup>st</sup> Floor  
35 70 Pembroke Place  
36 Liverpool  
37 L69 3GF, UK  
38 [Khoo@liv.ac.uk](mailto:Khoo@liv.ac.uk)  
39  
40  
41  
42  
43  
44  
45  
46  
47  
48  
49  
50  
51  
52  
53  
54  
55  
56  
57  
58  
59  
60



## Article Summary

### 1. Article Focus

- Some studies have reported lower error rates with more senior prescriber grades, and insufficient undergraduate prescriber training as a potential risk for prescribing errors
- Prescriptions frequently contain multiple medications, but data about errors on complete prescriptions (all prescribed items on an inpatient chart or discharge prescription), which give a better estimate of numbers of patients at risk of harm, are lacking
- We aimed to determine the differences in prescribing error rates between grades of prescriber, ward area, admission or discharge and type of medication prescribed

### 2. Key Messages

- We observed an error rate of 10.9% per prescribed item, with only 56.2% of 4238 complete prescriptions remaining error free.
- In multivariate analysis, the strongest predictor for prescribing error was the number of medicines on each prescription.
- We found no overall difference in error rate amongst different grades of prescriber, and newly qualified doctors were not more likely to make errors than their senior colleagues.

### 3. Strengths and Limitations

- This was a large study across nine diverse hospital settings
- We determined the rate of errors on complete prescriptions as well as for individually prescribed items, giving a better estimate of the numbers of patients affected by errors.
- We did not evaluate the impact of electronic prescribing on the prevalence and type of prescribing errors, however up to a quarter of the errors observed could potentially have been avoided through use of electronic prescribing and medicines administration systems

## Abstract

**Objective** To evaluate the prevalence, type and severity of prescribing errors observed between grades of prescriber, ward area, admission or discharge, and type of medication prescribed

**Design** Ward-based clinical pharmacists prospectively documented prescribing errors at the point of clinically checking admission or discharge prescriptions. Error categories and severities were assigned at the point of data collection, and verified independently by the study team

**Setting** Prospective study of nine diverse National Health Service (NHS) hospitals in North West England, including teaching hospitals, district hospitals and specialist services for paediatrics, women and mental health.

**Results** Of 4238 prescriptions evaluated, one or more error was observed in 1857 (43.8%) prescriptions, with a total of 3011 errors observed. Of these, 1264 (41.9%) were minor, 1629 (54.1%) were significant, 109 (3.6%) were serious and 9 (0.30%) were potentially life-threatening. The majority of errors considered to be potentially lethal (n=9) were dosing errors (n=8), mostly relating to overdose (n=7). The rate of error was not significantly different between newly qualified doctors compared with junior, middle grade or senior doctors. Multivariable analyses revealed the strongest predictor of error was the number of items on a prescription (risk of error increased 14% for each additional item). We observed a high rate of error from medication omission, particularly amongst patients admitted acutely into hospital. Electronic prescribing systems could potentially have prevented up to a quarter of (but not all) errors.

**Conclusions** In contrast to other studies, prescriber experience did not impact on overall error rate (although there were qualitative differences in error category). Given that multiple drug therapies are now the norm for many medical conditions, health systems should introduce and retain safeguards which detect and prevent error, in addition to continuing training and education, and migration to electronic prescribing systems.

## Introduction

Prescribing errors are common, with systematic reviews suggesting that as many as 50% of hospital admissions and 7% of medication orders are affected.<sup>1</sup> In recent studies, prescribing errors have been found to affect approximately 9-15% of medication orders for hospital inpatients in the United Kingdom (UK).<sup>2,3</sup> Over one third of 651 patients were found to have a prescribing error occurring at hospital admission in the United States (US).<sup>4</sup> Prescribing errors are also prevalent in primary care, affecting 37% of 9385 prescriptions in the US,<sup>5</sup> and one in eight patients (one in 20 prescription items) in the UK.<sup>6</sup> A study in the Netherlands evaluating medication omission errors in elderly patients admitted to hospital reported adverse consequences in 21% of 100 patients.<sup>8</sup>

Human error in healthcare may be considered in the context of individuals or health systems.<sup>9-11</sup> While personal factors such as forgetfulness, inattention, poor motivation, carelessness, negligence, and recklessness are important, a health systems approach more comprehensively addresses recurrent errors and organisation factors and processes which may give rise to that error. The person, the team, the task, the workplace and the institution as a whole are considered,<sup>9</sup> which identify weaknesses in the system's defences.<sup>9</sup> For example, higher hospital mortality at weekends may be associated with lower numbers of senior staff available outside of the normal working week.<sup>12,13</sup> Barriers which may prevent medication errors, or prevent errors from reaching the patient, may include electronic prescribing alerts, and prescription review by clinical pharmacists.

Data on factors which may contribute to prescribing errors, for example differences between grades of prescriber, ward area, admission or discharge and type of medication prescribed are sparse.<sup>3,14,15</sup> Existing data suggest that newly qualified and junior doctors are twice as likely to make prescribing errors than senior doctors, taking into account the larger volume of prescriptions written by junior prescriber grades.<sup>3</sup> Provision of sufficient undergraduate training to allow medical students to become safe prescribers when they begin work as newly qualified doctors is widely recognised as an important factor in reducing prescribing errors.<sup>14,16-18</sup> Teaching in UK medical schools has changed considerably over the last decade, with the General Medical Council stipulating that medical students must be adequately prepared to prescribe drugs and manage risk at the point of graduation.<sup>19,20</sup>

Whilst previous studies have evaluated error for individual medications, few studies have systematically evaluated complete prescriptions (all items included on a single inpatient prescription chart or discharge prescription at the time of clinical pharmacist check) to evaluate factors associated with prescribing error.<sup>1-3</sup> This is important as it gives a more accurate estimate of the numbers of patients who are potentially put at risk of harm by prescribing errors. We undertook a prospective survey of prescribing errors in nine diverse National Health Service (NHS) hospitals in the North West of England, aiming to examine the differences in prescribing error rates between grades of prescriber, ward area, admission or discharge, hospitals and the type and number of medicines prescribed. In order to further evaluate the role of undergraduate training, we also tested for a relationship between occurrence of error and medical school training of prescribers. As approximately 30% of the prescribers were trained at the local institution, the University of Liverpool, whether medical training was undertaken at this institution was included in the analysis. Univariate analysis and multivariate logistic regression was used to evaluate factors associated with prescribing errors.

## Methods

### Setting

A total of nine NHS hospitals from the Merseyside and Cheshire region took part in the audit. These comprised large teaching hospitals, general hospitals, specialist centres for paediatrics, women's health and mental health (Table 1). One hospital was using complete electronic prescribing systems (inpatient prescribing, medication ordering, discharge prescriptions) on some wards at the time of the audit. Eight of the hospitals were using paper prescription charts for inpatients and either handwritten or transcribed electronically generated discharge prescriptions. In this setting, ward-based clinical pharmacists check inpatient prescriptions at, or soon after patient admission, when medicines reconciliation is undertaken. Inpatient prescription charts are then checked at least daily by the pharmacist. Discharge prescriptions are checked and authorised by a clinical pharmacist prior to supply of medication. Pharmacists may amend or clarify some aspects of prescribing, or discuss with the clinical team any recommendations or safety issues at these points of care. Clinical pharmacists may also participate in ward rounds and multidisciplinary team meetings, where prescribing may be discussed with clinicians, clarified or amended.

### Data Collection

As this was an audit of unlinked anonymised prescriptions, Ethics approval was not required in accordance with local guidance. We aimed to capture data from all seven hospital trusts in the region. Two additional hospitals adjacent to and linked with healthcare provision in the Merseyside region were also audited. The number of prescriptions audited was empirically determined in order to generate a sample size equivalent to a large study recently undertaken in the UK.<sup>3</sup> In order to audit practice across the region, each hospital was asked to audit a minimum of 400 prescriptions.

We adopted the following definition of prescribing errors for the study, which excludes adherence to local prescribing policy and guidelines: "A clinically meaningful prescribing error occurs when, as a result of a prescribing decision or prescription writing process, there is an unintentional significant: (1) reduction in the probability of treatment being timely and effective or (2) increase in the risk of harm when compared with generally accepted practice".<sup>21</sup> A standard questionnaire collected data on error category and severity (based on EQUIP error classifications). The EQUIP study was a large prospective survey of prescribing errors affecting hospital inpatients in the UK,<sup>3</sup> and the error classifications were therefore considered relevant to our setting. Nominated ward-based clinical pharmacists prospectively documented prescribing errors at the point of checking inpatient or discharge prescriptions, during normal pharmacy working hours, therefore each audit form was a point prevalence of prescribing errors at the time of pharmacist clinical check. Acute admission was defined as the first 24 hours in hospital. For all prescription sheets generated in acute admission settings, a separate audit form was completed (to allow for emergency prescribing in the absence of a full drug history without this being recorded as an error) and we sought to record only unintended medication omissions (e.g. following medicines reconciliation with general practices or primary healthcare databases). Hospitals were advised to complete the study on different days of the week throughout the period of the audit, in order to capture an even spread of days. For example data collection would occur weekly, on Monday in week one, Tuesday in week two, Wednesday in week three, in order to minimise double auditing of the same patient on admission to hospital and subsequent admission to a ward. Therefore, if patients were audited twice, an interval of at least one week would separate each audit form, unless their acute admission/inpatient /discharge prescription were audited

1  
2  
3 on the same day. If items on prescriptions had been previously screened, they would be  
4 counted again in any subsequent auditing, though there would be a one week interval since  
5 previous auditing, or the patient would be a different stage of hospital admission. All types of  
6 medication order were audited, including IV fluids, when required and once only medication.  
7  
8

### 9 10 **Prescriber Category**

11 Pharmacists were required to indicate the category of prescribers on data collection forms.  
12 For this analysis, prescribers were categorised as follows: newly qualified (foundation year 1,  
13 house officers), junior (foundation year 2, specialist or 'core' training years 1 & 2), mid grade  
14 (specialist registrars, training fellows), senior (consultant), non-medical (nurse or pharmacist  
15 prescribers), other (for example locum doctors for whom grade was unclear) and unknown  
16 (no information concerning prescriber recorded).  
17

### 18 19 **Grading of prescribing errors**

20 We modified EQUIP study criteria<sup>3</sup> for error categorisation and severity classification by  
21 adding or clarifying severity criteria for all error categories, and by grouping errors into ten  
22 distinct areas according to stage of the prescribing process (see below and Table 2).  
23 'Exclusion' and 'inclusion' of errors into EQUIP study error types were defined, in order to  
24 differentiate categories with potential overlap. Severity ratings were further defined and  
25 assigned to each error category based on modified EQUIP study criteria and taking into  
26 account the perceptions of the original pharmacist gradings. Severity ratings related to the  
27 potential severity, had the error been allowed to progress through to the patient, as the  
28 majority of errors were corrected prior to the point of administration. In order to limit  
29 misclassification of errors, the original 29 EQUIP categories were batched into 10 different  
30 types of error groups as follows: (1) Dosing errors, (2) Writing errors, (3) Allergy status  
31 errors, (4) Duration of treatment wrong/not specified, (5) Drug interactions, (6) Omission of  
32 medication, (7) Excessive/unnecessary prescribing, (8) Clinical safety errors, (9) Lack of  
33 clear directions for administration, (10) a new error category (Miscellaneous) was added  
34 (Table 2 ). The modification and definition of error categories and severities was undertaken  
35 by two members of the study team (KS, SK) and agreed by a third (TK).  
36  
37  
38  
39

40 Despite using a standard set of definitions, we noted discrepancies across various hospitals  
41 in both error categorisation and severity rating. In particular there was a tendency to over-  
42 report errors and to overestimate their potential severity. This was confirmed by a *post-hoc*  
43 inter-rater agreement analysis. A set of six sample prescriptions was generated. A list of 14  
44 sample errors was decided by the study team, including study error type and severity,  
45 according to the criteria in Table 2 utilised for analysis of the main study. The errors selected  
46 occurred frequently in the main study, and covered a broad range of error categories and  
47 severities. Six pharmacists from each participating hospital were asked to each screen the  
48 six prescription scenarios containing the 14 errors and to record any observed errors,  
49 allocating error types and severities. The exact agreement percentages between category  
50 classification, severity classification and both combined were computed to measure the  
51 absolute concordances between pharmacist scores against the gold standard assessment.  
52  
53  
54

55 In order to limit inter-observer bias, all grading and severity of errors identified in the main  
56 study were independently reassessed by two members of the study team (KS and SK), with  
57 discordant assessments collectively discussed with a third (TK) in order to agree a final  
58 categorisation for error type and severity. For severity ratings, the summary of product  
59 characteristics for relevant medication was consulted, in order to determine potential  
60

1  
2  
3 implications of different degrees of overdose, underdose, of drug interactions, and also to  
4 confirm clinical contra-indications.  
5

### 6 **Statistical Analyses**

7  
8 Data were analysed at the prescription level using complete case data. The prevalence and  
9 severity of errors observed were tabulated using percentage frequencies. A Forest plot  
10 was produced to present the error prevalence rate and 95% confidence interval (95% CI) for  
11 each hospital and grade of prescriber. For the formal statistical analysis, when there was  
12 more than one error on a prescription, only the most severe error was included. This  
13 approach was used to ensure that the errors included in the analysis were independent. In  
14 this study, we assessed hospital, prescriber grade (newly qualified, junior, mid-grade, senior,  
15 non-medical, other), ward area (medical, surgical, A&E, mental health, critical care), number  
16 of prescribed medicines, an indicator to denote whether the prescription was prescribed on  
17 admission or on discharge and an indicator to denote whether the prescriber was Liverpool  
18 trained or not as potential risk factors. Univariate statistical analyses were performed using a  
19 chi-squared test except for continuous data, which were analysed using the Mann-Whitney U  
20 test. A multivariate logistic regression model for a prescription error was fitted to the data.  
21 Results are given in terms of an odds ratio (OR) and associated 95% CI. All risk factors that  
22 were statistically significant ( $p < 0.1$ ) in the univariate analysis were considered for inclusion in  
23 the multivariate model with the exception of ward area as a number of hospitals only  
24 reported a single specialty type.  
25

26 All statistical analysis was carried out using the statistical software package SPSS (version  
27 20) using a two-sided significance level of 0.05 (5%) throughout.  
28  
29  
30  
31  
32  
33  
34  
35  
36  
37  
38  
39  
40  
41  
42  
43  
44  
45  
46  
47  
48  
49  
50  
51  
52  
53  
54  
55  
56  
57  
58  
59  
60

## Results

### *Error Classification*

During the *post-hoc* inter-rater agreement analysis, approximately 75% of error categories were correctly identified by pharmacists when compared to the standards. Only 47% of severity ratings were concordant with the standards, and 40% of pharmacists rated both error category and severity in concordance with the standards.

Re-assessment of errors by the study team resulted in exclusion of a total of 143 errors which were not considered true errors of the process of prescribing. The error category was re-graded for 434 errors, and severity was re-graded for 724 errors, which was predominantly a down-grading.

### *Descriptive data and severity of errors*

A total of 4238 prescriptions were evaluated; of these, 1857 (43.8%) prescriptions contained at least one error (Table 3). The overall prevalence of prescribing errors (number of prescriptions with one or more error/prescriptions evaluated) ranged from 20% to 60% across the nine hospitals (Figure 1). The rate of errors per prescribed item was 10.9%.

A total of 3011 individual errors were observed within the 1857 prescriptions containing an error. Of these 3011 errors, 1264 (41.9%) were minor, 1629 (54.1%) were significant, 109 (3.6%) were serious and nine (0.30%) were potentially life-threatening (Table 3). Details of all potentially life-threatening errors are listed in Table 4 and mainly comprised dosing errors (n=8), particularly overdose (n=7), with one incidence of under dose. A further error considered to be potentially lethal related to prescription of a medicine to which the patient had previously had a serious allergic reaction.

The proportion of errors categorised with severity as significant or higher by prescriber grade were as follows: all prescribers 58.0%, newly qualified 51.2%, junior 60.8%, mid grade 66.4%, senior 57.6% ( $\chi^2_{\text{trend}} p < 0.001$  for univariate analysis, although this association disappeared when corrected for other potential confounders)(Table 3).

Fewer errors were observed on discharge prescriptions than on prescriptions written on admission. More errors were observed in prescriptions containing antibiotics, insulin, warfarin and oxygen, although this does not take into account the number of items on each prescription. Whether doctors were Liverpool trained or not did not affect the number of errors observed (Table 3).

Differences in error prevalence and error types were observed in individual participating hospitals. The lowest rates of errors was reported for the paediatrics specialty hospital, with 0.07 errors observed per prescribed item, and 0.26 errors observed per prescription. However, in multivariate analysis, there was no significant reduction in error risk and it is likely that the effect could be due to lower number of items per prescription (mean 3.5, vs pooled data: 6.3). The most common error types were dosing errors (30%) and medication omission (23.1%).

Significantly lower risk of errors was observed in the hospital providing specialist services for women ( $p=0.04$ , Table 6) in multivariate analysis. One of the lowest error rates per prescription was observed (0.28), although the error rate per prescribed item (0.11) was

1  
2  
3 equal to that of the pooled data. The most common error type observed was  
4 excessive/unnecessary prescribing (50%). No errors of medication omission were observed.  
5 This hospital also had a low number of items per prescription (2.4), and was using electronic  
6 prescribing systems on some wards.  
7  
8

### 9 10 *Error types*

11  
12 The most frequent error types for all prescribers were medication omission, accounting for  
13 26.9%, writing errors accounting for (20.7%) and dosing errors accounting for (20.6%) of all  
14 errors recorded. There was little difference in the variability of error types across different  
15 prescriber grades (Figure 2).  
16  
17

### 18 19 *Risk factor analysis*

20  
21 Results of the univariate analysis are shown in Table 5. Missing data limited inclusion of all  
22 reported prescriptions in risk factor analysis, notably as one acute hospital failed to return  
23 data on number of items on each prescription. All factors considered appeared to show a  
24 significant difference except for whether doctors had trained in Liverpool, which made no  
25 significant difference ( $p=0.91$ ) to whether an error occurred on the prescription. Multivariate  
26 risk factor analysis showed that the likelihood of an error increased for every additional item  
27 included on the prescription (OR 1.14, 95% C 1.12, 1.17,  $p<0.001$ ) (Table 5). Therefore, for  
28 each additional item on the prescription, the risk of an error occurring increased by about  
29 14%. There was also a trend towards errors being more likely to occur on admission  
30 prescriptions than on discharge prescriptions, with an odds ratio (OR) of 1.16 (95% CI 0.70,  
31 1.92,  $p=0.58$ ), although this difference did not reach statistical significance (Table 6). No  
32 significant differences were found in error rates between different prescriber grades, when  
33 compared to newly qualified doctors (Figure 2, Figure 3) in multivariate analyses.  
34  
35  
36  
37  
38  
39

### 40 **Discussion**

41  
42 In this large study, only 56.2% of 4238 prescriptions written had no reported errors. Of the  
43 errors recorded, 41.9% were minor, 54.1% significant, 3.6% serious and 0.3% potentially life  
44 threatening. It is important to note that severity ratings relate to the potential severity had  
45 the error been allowed to progress through to the patient - in fact the majority of errors were  
46 corrected prior to the point of administration. In multivariate analysis, the strongest predictor  
47 for prescribing error was the number of medicines on each prescription, with risk for  
48 prescribing error increasing by 14% for every additional medication item prescribed. Where  
49 data were available, prescriptions contained an average of 6.3 medication items, although  
50 this varied from 2.4 – 7.5 items according to medical specialty surveyed. Uncorrected  
51 analyses suggested that errors were frequent in prescriptions containing insulin (15.5%),  
52 antibiotics (18%), warfarin (9.2%) and oxygen (5.6%), although these patients were very  
53 likely to have been receiving multiple medications. Error rates were highest amongst  
54 specialties which prescribed a broad range of medications (e.g. acute medicine, compared  
55 to elective surgery), and also differed between different hospital Trusts, with hospitals  
56 specialising in paediatrics, maternal health and mental health exhibiting the lowest error  
57  
58  
59  
60



1  
2  
3 rates. However, when corrected for number of medications, these differences did not remain  
4 significant, with the exception of maternal health.  
5

6  
7 The most frequent error encountered was unintended medication omission following acute  
8 hospital admission (0.97 errors/prescription written, versus 0.53 for discharge medications).  
9 When adjusted in multivariable analyses (Table 6) there was no statistically significant  
10 difference in error rates between admission and discharge. We found no overall difference in  
11 error rate amongst different grades of prescriber, and newly qualified doctors were not more  
12 likely to make errors than their senior colleagues. Although numbers were relatively small,  
13 we observed no difference in error rate amongst newly qualified doctors by undergraduate  
14 training, and doctors trained in Liverpool were neither more nor less likely to commit  
15 medication errors. The categories and severity of errors made by different prescriber grades  
16 were broadly similar (Table 3, Figure 2), however some differences were observed. For  
17 example, writing errors were more frequently observed with newly qualified doctors,  
18 medication omission was more frequently observed with junior and mid grade doctors, and  
19 dosing errors were more frequently observed with mid grade doctors.  
20  
21

22  
23 These results are consistent with previously published studies. Both the EQUIP and  
24 PRACTiCe Studies<sup>3 6</sup> reported error rates of approximately 1 in 10 medications prescribed  
25 (we observed a rate of 10.9%). Given the high number of medications prescribed (mean of  
26 6.3 items/prescription) nearly half of all prescriptions contained at least one error.

27 A systematic review found prescribing errors to be more common in adults than in children.<sup>1</sup>  
28 A study in Spain comparing paediatric wards with obstetrics found that paediatric patients  
29 had a fourfold higher risk of serious errors than the maternity population (2.3% vs 14.3%),  
30 which were mainly related to drug dosing.<sup>22</sup> We observed a low error rate for the paediatrics  
31 specialty hospital, although this was likely due to a low number of prescribed items. Dosing  
32 errors were the most common error type. Another study reported that prescribing errors were  
33 more common in primary care amongst men compared to women.<sup>6</sup> We observed a  
34 significantly lower risk for errors in specialist services for women.  
35  
36

37  
38 In the EQUIP study, multivariate analysis showed that all grades of doctors were more likely  
39 to write a prescription containing an error than consultants.<sup>3</sup> A retrospective study which  
40 evaluated errors on discharge prescriptions found no significant difference in error rates  
41 between prescriber grades, although no senior (consultant) level prescribers were  
42 included.<sup>15</sup> In primary care, the grade of general practitioner was not associated with  
43 prescribing errors.<sup>6</sup> We observed no significant difference in prescribing error rates between  
44 prescriber grades, when compared to newly qualified prescribers. EQUIP also reported that  
45 medication orders issued at acute admission were 70% more likely to be associated with a  
46 prescribing error.<sup>3</sup> Another study found lower error rates on discharge prescription items  
47 than was observed with general inpatient prescribing, due to a lower rate of medication  
48 omission, however these factors were not corrected for the number of items on each  
49 prescription.<sup>2</sup> We observed a trend towards errors being more likely to occur on admission  
50 prescriptions than on discharge prescriptions, with an odds ratio (OR) of 1.16, although this  
51 did not reach significance in multivariate analysis.  
52  
53  
54

55  
56 In multivariate analysis, the strongest predictor for prescribing error was the number of  
57 medicines on each prescription, with risk for prescribing error increasing by 14% for every  
58 additional medication item prescribed. Complex polypharmacy is becoming increasingly  
59 common, with patients potentially requiring management for multiple chronic conditions  
60

1  
2  
3 simultaneously. In these patients, vigilance for prescribing errors and pharmacist review is of  
4 particular importance.  
5

6  
7 Our study was limited by missing data (one acute hospital failed to return data on number of  
8 items on each prescription), and although pharmacists had received some basic training in  
9 completing the evaluations, *post-hoc* analyses suggested significant variability between  
10 pharmacists' classification of errors, and especially in assignment of severity classification.  
11 Two of us independently revised each prescribing error and noted a tendency to over-  
12 estimate the severity of errors, and (in keeping with EQUIP criteria) included in our  
13 evaluations an assessment of whether or not a wrong dose was likely to have been actually  
14 administered based on tablet burden. We also refined EQUIP criteria to assign severity  
15 ratings to error categories where these had previously not been provided. Finally, in order to  
16 limit the impact of error misclassification on study findings, the original 29 error categories  
17 were batched into 10 different types of error groups relating to key components of  
18 prescribing. Since our data collection forms did not allow us to evaluate errors which had  
19 been missed, it is possible that our observed error rates may represent an under-estimate of  
20 the true burden of prescribing error.  
21  
22

23  
24 Medication omission was the most prevalent error, representing 26.9% of all errors  
25 observed, which is consistent with previous reports.<sup>2 15</sup> Prescribing during acute admission  
26 in the absence of a full medication history may sometimes be unavoidable, and does not  
27 necessarily constitute an error. For this reason we discriminated between 'emergency'  
28 prescribing, and errors where a more complete or accurate medication history would have  
29 prevented omission of prescribed medications. Although we sought to capture only  
30 unintended medication omission, it is possible that there might still have been cases where  
31 the omission was intentional (for example, suspension of diuretics in a patient who was  
32 hypotensive or dehydrated on admission) but this intent had been missed by the pharmacist  
33 collecting the data. A sensitivity analysis showed that if all errors of medication omission  
34 either on discharge or admission were excluded, the number of errors totals 2249 (0.53 per  
35 prescription written); with 1471 (34.7%) prescriptions containing at least one error, which  
36 represents a significant reduction in overall prescribing error rate. A core role for clinical  
37 ward based pharmacists is medicines reconciliation for admitted patients. This involves  
38 detailed medication history taking, recording of full medication list in the patient's case notes,  
39 and discussion with the clinical team to ensure that all regular medicines are prescribed  
40 throughout the admission, if appropriate. Similarly, on discharge, pharmacists ensure that  
41 necessary regular medicines are continued, and that any medicines newly started during the  
42 admission are prescribed for discharge as appropriate. The majority of the omission errors  
43 reported will have been rectified during admission or prior to discharge, as a result of the  
44 pharmacist clinical check. This highlights the importance of medicines reconciliation as soon  
45 as practicable at hospital admission, in order to minimise the possibility of missed doses of  
46 essential medicines. The role of pharmacists in acute admission settings may therefore be of  
47 particular benefit.  
48  
49  
50  
51  
52

53 EQUIP error categories which could potentially be eliminated by introduction of electronic  
54 prescribing (strength/dose missing, product/formulation not specified, no signature, start date  
55 incorrect/missing, incorrect route, IV instructions incorrect/missing) accounted for 357  
56 (11.9%) of the 3011 errors observed. A further 376 (12.5%) errors could be reduced by  
57 electronic prescribing, via alerts, cautions and required fields at the patient entry/prescribing  
58 stage, although many of these can be over-ridden by the prescriber.<sup>23</sup> These include:  
59 administration times missing/incorrect, duplication, CD requirements incorrect/missing. The  
60

1  
2  
3 extent to which electronic prescribing can eliminate particular error types depends on the  
4 individual systems used. Importantly, whilst electronic prescribing systems could potentially  
5 have prevented up to a quarter of errors, these systems are best utilised alongside rather  
6 than instead of existing safeguards. We did not formally evaluate differences in error rates  
7 between electronic prescribing and paper-based prescribing systems. Although one hospital  
8 (Hospital G) was utilising complete electronic prescribing systems on some wards at the time  
9 of the study, and many of the other hospitals were using electronically generated discharge  
10 summaries, we failed to observe any clear association with error rate, mainly because of the  
11 large variability in case mix which impacted directly on the number of items/prescription. In  
12 contrast, EQUIP reported that electronic prescriptions were 12% less likely to be associated  
13 with a prescribing error than handwritten prescriptions.<sup>3</sup> Although electronic discharge  
14 summaries may reduce error due to legibility, they do not eliminate the transcription step  
15 from inpatient charts. One study which analysed 1808 handwritten and electronic discharge  
16 summaries found no difference in the number or types of errors observed.<sup>15</sup> It is also worth  
17 noting that electronic systems, while clearly offering an advantage over conventional  
18 medicines management and prescribing systems, have themselves been associated with  
19 new patterns of error. Studies in the UK and Australia found a significant reduction in  
20 prescribing errors detected after introduction of electronic prescribing systems, but also  
21 identified errors specific to the electronic prescribing system used, for example, incorrect  
22 product selected from drop-down menu, or incorrect dosing frequency selected.<sup>24-26</sup> These  
23 electronic systems will doubtless continue to improve through refinement.<sup>23 27</sup>

28  
29 The Erice Medication Errors Research Group (EMERGE) recommendations for reducing  
30 prescribing errors, includes training and assessment of prescribers, ongoing monitoring,  
31 awareness and communication.<sup>14</sup> Health systems which may impact on likelihood of error  
32 occurring include European harmonisation of prescribing, introduction of integrated  
33 prescription forms, use of IT systems such as electronic prescribing, and standardisation,  
34 evaluation, and certification of such systems. Involvement of clinical pharmacists at all points  
35 of the medication process is also recommended.<sup>14</sup> The latter is important since all the  
36 hospital Trusts in our survey had evolved systems to safeguard patients from prescribing  
37 error (regardless of the adoption of electronic prescribing), and this involved use of ward-  
38 based pharmacists and dispensary staff to perform routine checks on all prescriptions issued  
39 <sup>3 10 22 28</sup>. This likely represents the 'last line of defence' against prescribing error, and has  
40 greatest utility when deployed in clinical areas associated with highest risk, for example  
41 patients with complex polypharmacy, and hospital admission settings. One fundamental role  
42 of clinical pharmacists during acute admission is medicines reconciliation, where a patient's  
43 full medication history is determined and recorded using all available sources of information.  
44 We found that prescribing errors in secondary care are prevalent, regardless of prescriber  
45 grade. Our findings therefore suggest that removing this safeguard (e.g. through service  
46 reconfiguration or in an effort to reduce costs) could potentially lead to higher numbers of  
47 medication errors actually reaching the patient.  
48  
49  
50  
51  
52  
53  
54  
55  
56  
57  
58  
59  
60

### **Acknowledgements**

We gratefully acknowledge the contributions of pharmacists who participated in this study. This work was funded through an unrestricted educational grant from Mersey Deanery, although design, execution, analysis and reporting was carried out independently by the study team.

We thank Professor David Graham, Postgraduate Medical Dean, Mersey Deanery, for supporting the project

We thank the National Institute of Health Research (NIHR Department of Health) and the Northwest Development Agency (NWDA) for infrastructural and project support.

### **Declaration**

All authors have completed the Unified Competing Interest form and declare that (1) SK has received research funding for website development from Merck, Bristol Myers Squibb, Gilead, ViiV, Tibotec, and Abbott, and honoraria, travel support for conference attendance from Roche, Tibotec, and Viiv in the past 3 years. All other authors have nothing to declare

TK and SHK developed the study concept, ML, SJ, AMc, AR, JS, AG, CC, BT co-ordinated data collection, KS, SHK analysed the data, JJK undertook the main statistical analysis with tabulations produced by KS. KS, SHK prepared the manuscript. JJK was involved in substantial revisions of the manuscript. TK, ML, SJ, AMc, AR, JS, AG, CC, BT reviewed the manuscript, SHK is the guarantor for the project.

All authors, external and internal, had full access to all of the data (including statistical reports and tables) in the study and can take responsibility for the integrity of the data and the accuracy of the data analysis

Data sharing: all requests for data sharing to Professor SH Khoo (khoo@liv.ac.uk)

The Corresponding Author has the right to grant on behalf of all authors and does grant on behalf of all authors, an exclusive licence (or non exclusive for government employees) on a worldwide basis to the BMJ Publishing Group Ltd to permit this article (if accepted) to be published in BMJ editions and any other BMJ PGL products and sublicences such use and exploit all subsidiary rights, as set out in our licence

## References

1. Lewis PJ, Dornan T, Taylor D, Tully MP, Wass V, Ashcroft DM. Prevalence, incidence and nature of prescribing errors in hospital inpatients: a systematic review. *Drug Saf* 2009;32(5):379-89.
  2. Franklin BD, Reynolds M, Shebl NA, Burnett S, Jacklin A. Prescribing errors in hospital inpatients: a three-centre study of their prevalence, types and causes. *Postgrad Med J* 2011;87(1033):739-45.
  3. EQUIP final report. [http://www.gmc-uk.org/FINAL\\_Report\\_prevalence\\_and\\_causes\\_of\\_prescribing\\_errors.pdf](http://www.gmc-uk.org/FINAL_Report_prevalence_and_causes_of_prescribing_errors.pdf) 28935150.pdf
  4. Gleason KM, McDaniel MR, Feinglass J, Baker DW, Lindquist L, Liss D, et al. Results of the Medications at Transitions and Clinical Handoffs (MATCH) study: an analysis of medication reconciliation errors and risk factors at hospital admission. *J Gen Intern Med* 2010;25(5):441-7.
  5. Abramson EL, Bates DW, Jenter C, Volk LA, Barron Y, Quaresimo J, et al. Ambulatory prescribing errors among community-based providers in two states. *J Am Med Inform Assoc* 2011.
  6. The PRACTiCe Study (PRevalence And Causes of prescribing errors in general practiCe) A report for the GMC May 2012 [http://www.gmc-uk.org/Investigating\\_the\\_prevalence\\_and\\_causes\\_of\\_prescribing\\_errors\\_in\\_general\\_practice\\_The\\_PRACTiCe\\_study\\_Report\\_May\\_2012\\_48605085.pdf](http://www.gmc-uk.org/Investigating_the_prevalence_and_causes_of_prescribing_errors_in_general_practice_The_PRACTiCe_study_Report_May_2012_48605085.pdf)
  7. Davies EC, Green CF, Taylor S, Williamson PR, Mottram DR, Pirmohamed M. Adverse drug reactions in hospital in-patients: a prospective analysis of 3695 patient-episodes. *PLoS One* 2009;4(2):e4439.
  8. Drenth-van Maanen AC, Spee J, van Hensbergen L, Jansen PA, Egberts TC, van Marum RJ. Structured history taking of medication use reveals iatrogenic harm due to discrepancies in medication histories in hospital and pharmacy records. *J Am Geriatr Soc* 2011;59(10):1976-7.
  9. Reason J. Human error: models and management. *BMJ* 2000;320(7237):768-70.
  10. Dean B, Schachter M, Vincent C, Barber N. Causes of prescribing errors in hospital inpatients: a prospective study. *Lancet* 2002;359(9315):1373-8.
  11. Barber N, Rawlins M, Dean Franklin B. Reducing prescribing error: competence, control, and culture. *Qual Saf Health Care* 2003;12 Suppl 1:i29-32.
  12. Inside your Hospital: Dr. Foster Hospital Guide 2001-2011. Dr Foster Intelligence/Department of Health L, UK. Available from URL: [http://drfosterintelligence.co.uk/wp-content/uploads/2011/11/Hospital\\_Guide\\_2011.pdf](http://drfosterintelligence.co.uk/wp-content/uploads/2011/11/Hospital_Guide_2011.pdf), date last accessed 13/3/12.
  13. Hospital Patients 'More Likely to Die at Weekends' BBC News, London. Available from URL: <http://www.bbc.co.uk/news/health-15895663>, date last accessed 13/3/12.
  14. Agrawal A, Aronson JK, Britten N, Ferner RE, de Smet PA, Fialova D, et al. Medication errors: problems and recommendations from a consensus meeting. *Br J Clin Pharmacol* 2009;67(6):592-8.
  15. Callen J, McIntosh J, Li J. Accuracy of medication documentation in hospital discharge summaries: A retrospective analysis of medication transcription errors in manual and electronic discharge summaries. *Int J Med Inform* 2010;79(1):58-64.
  16. Likic R, Maxwell SR. Prevention of medication errors: teaching and training. *Br J Clin Pharmacol* 2009;67(6):656-61.
  17. Harding S, Britten N, Bristow D. The performance of junior doctors in applying clinical pharmacology knowledge and prescribing skills to standardized clinical cases. *Br J Clin Pharmacol* 2010;69(6):598-606.
  18. Goldacre MJ, Taylor K, Lambert TW. Views of junior doctors about whether their medical school prepared them well for work: questionnaire surveys. *BMC Med Educ* 2010;10:78.
  19. Tomorrow's Doctors, General medical Council, London, UK. February 2003. Available from URL: [http://www.gmc-uk.org/static/documents/content/TomorrowsDoctors\\_2003.pdf](http://www.gmc-uk.org/static/documents/content/TomorrowsDoctors_2003.pdf).
  20. Tomorrow's Doctors. General Medical Council, London UK. September 2009. Available from URL: [http://www.gmc-uk.org/static/documents/content/TomorrowsDoctors\\_2009.pdf](http://www.gmc-uk.org/static/documents/content/TomorrowsDoctors_2009.pdf)
- For peer review only - <http://bmjopen.bmj.com/site/about/guidelines.xhtml>

- 1
- 2
- 3 21. Dean B, Barber N, Schachter M. What is a prescribing error? *Qual Health Care* 2000;9(4):232-7.
- 4 22. Fernandez-Llamazares CM, Calleja-Hernandez MA, Manrique-Rodriguez S, Perez-Sanz C, Duran-
- 5 Garcia E, Sanjurjo-Saez M. Prescribing errors intercepted by clinical pharmacists in
- 6 paediatrics and obstetrics in a tertiary hospital in Spain. *Eur J Clin Pharmacol* 2012.
- 7 23. Scott GP, Shah P, Wyatt JC, Makubate B, Cross FW. Making electronic prescribing alerts more
- 8 effective: scenario-based experimental study in junior doctors. *J Am Med Inform Assoc*
- 9 2011;18(6):789-98.
- 10 24. Donyai P, O'Grady K, Jacklin A, Barber N, Franklin BD. The effects of electronic prescribing on the
- 11 quality of prescribing. *Br J Clin Pharmacol* 2008;65(2):230-7.
- 12 25. Westbrook JI, Reckmann M, Li L, Runciman WB, Burke R, Lo C, et al. Effects of two commercial
- 13 electronic prescribing systems on prescribing error rates in hospital in-patients: a before and
- 14 after study. *PLoS Med* 2012;9(1):e1001164.
- 15 26. Jani YH, Barber N, Wong IC. Republished error management: Paediatric dosing errors before and
- 16 after electronic prescribing. *Postgrad Med J* 2011;87(1030):565-8.
- 17 27. Nanji KC, Rothschild JM, Salzberg C, Keohane CA, Zigmont K, Devita J, et al. Errors associated with
- 18 outpatient computerized prescribing systems. *J Am Med Inform Assoc* 2011;18(6):767-73.
- 19 28. Klopotoska JE, Kuiper R, van Kan HJ, de Pont AC, Dijkgraaf MG, Lie AHL, et al. On-ward
- 20 participation of a hospital pharmacist in a Dutch intensive care unit reduces prescribing
- 21 errors and related patient harm: an intervention study. *Crit Care* 2010;14(5):R174.
- 22
- 23
- 24
- 25
- 26
- 27
- 28
- 29
- 30
- 31
- 32
- 33
- 34
- 35
- 36
- 37
- 38
- 39
- 40
- 41
- 42
- 43
- 44
- 45
- 46
- 47
- 48
- 49
- 50
- 51
- 52
- 53
- 54
- 55
- 56
- 57
- 58
- 59
- 60



**Figure 1.** Forest plot showing prescribing error rates in nine hospitals across North West England.

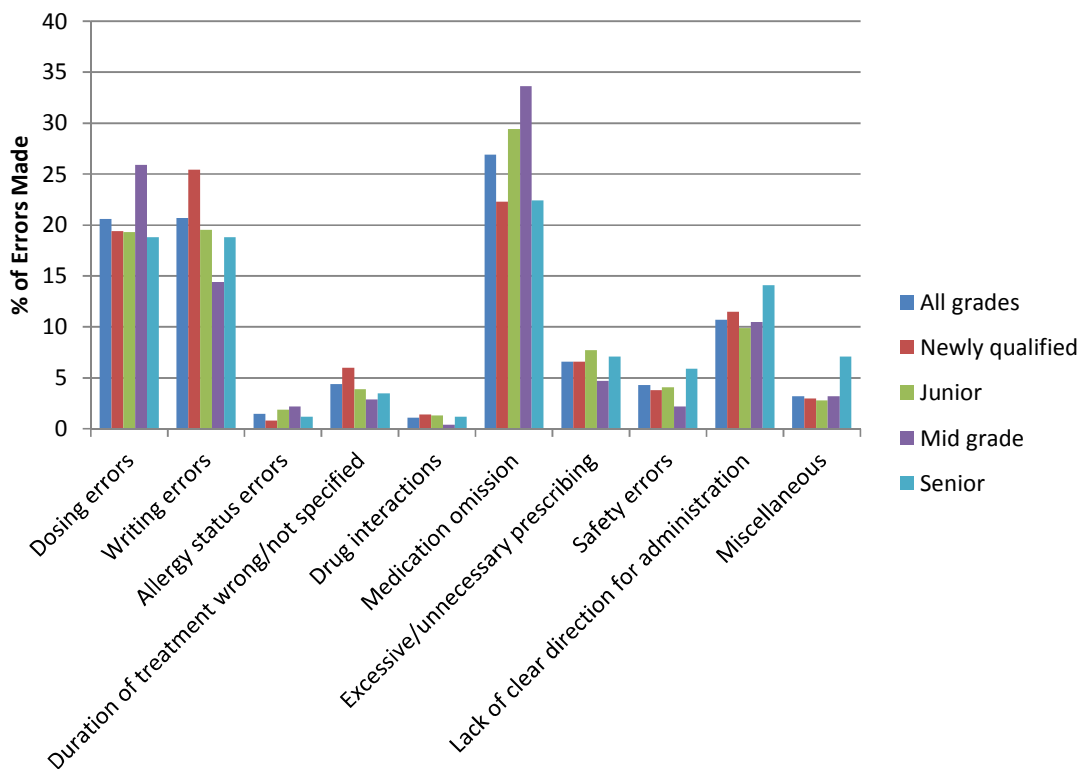

**Figure 2.** Categories of prescribing errors made by different grades of prescriber

1  
2  
3  
4  
5  
6  
7  
8  
9  
10  
11  
12  
13  
14  
15  
16  
17  
18  
19  
20  
21  
22  
23  
24  
25  
26  
27  
28  
29  
30  
31  
32  
33  
34  
35  
36  
37  
38  
39  
40  
41  
42  
43  
44  
45  
46  
47  
48  
49  
50  
51  
52  
53  
54  
55  
56  
57  
58  
59  
60

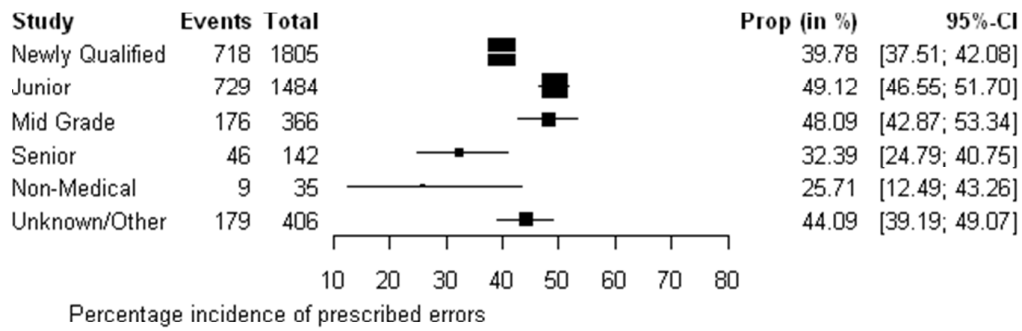

Figure 3. Forest plot showing prescribing error rates made by different prescriber grades

peer review only



Table 1. Types of hospitals contributing prescription data

| Teaching Hospitals | District Hospitals | Specialist Hospitals<br>(Women, Paediatrics,<br>Mental Health) |
|--------------------|--------------------|----------------------------------------------------------------|
| Hospital A         | Hospital B         | Hospital D                                                     |
| Hospital C         | Hospital E         | Hospital G                                                     |
| Hospital H         | Hospital F         | Hospital I                                                     |

For peer review only

1 **Table 2.** Application of error categories and severity ratings for the Mersey Deanery Prescribing Audit

2  
3  
4  
5  
6  
7  
8  
9  
10  
11  
12  
13  
14  
15  
16  
17  
18  
19  
20  
21  
22  
23  
24  
25  
26  
27  
28  
29  
30  
31  
32  
33  
34  
35  
36  
37  
38  
39  
40  
41  
42  
43  
44  
45  
46  
47  
48  
49

| Modified EQUIP Error Category                 | Original EQUIP Error Category     | Includes/Excludes                                                                                                | Severity (EQUIP)                                                                                                                                                                                                                                                                                                                                                       | Severity Modification                                                                                                                                                                                                |
|-----------------------------------------------|-----------------------------------|------------------------------------------------------------------------------------------------------------------|------------------------------------------------------------------------------------------------------------------------------------------------------------------------------------------------------------------------------------------------------------------------------------------------------------------------------------------------------------------------|----------------------------------------------------------------------------------------------------------------------------------------------------------------------------------------------------------------------|
| 1. Dosing Errors                              | Underdose                         |                                                                                                                  | <b>Minor</b> if unable/unlikely to carry out (units); <b>Significant</b> if dose too low to treat the condition; <b>Serious</b> if patient in acute distress; <b>Potentially Lethal</b> if medication life saving                                                                                                                                                      |                                                                                                                                                                                                                      |
|                                               | Overdose                          | Excludes overdoses caused by duplication eg. Paracetamol with co-codamol                                         | <b>Minor</b> if unable/unlikely to carry out (units); <b>Significant</b> - low TI, ½-4 times; <b>Serious</b> - Low TI, 4-10 times; errors in units if chance dose could be given; <b>Potentially Lethal</b> if v.low TI and dose 10 times normal dose, results in serum levels of drug in severe toxicity range, or has high potential to cause cardiopulmonary arrest | <b>Minor</b> if effect of dosing expected to be minimal                                                                                                                                                              |
|                                               | Dose/rate mismatch                |                                                                                                                  | -                                                                                                                                                                                                                                                                                                                                                                      | Judgement used based on Equip severity categories                                                                                                                                                                    |
| 2. Writing Errors                             | Strength/dose missing             | Includes dose units missing                                                                                      | <b>Minor</b>                                                                                                                                                                                                                                                                                                                                                           |                                                                                                                                                                                                                      |
|                                               | Product/formulation not specified |                                                                                                                  | -                                                                                                                                                                                                                                                                                                                                                                      | <b>Minor</b>                                                                                                                                                                                                         |
|                                               | Incorrect formulation             |                                                                                                                  | -                                                                                                                                                                                                                                                                                                                                                                      | <b>Minor</b> unless formulation likely to have implication on treatment eg. Insulin, co-careldopa, in which case <b>significant/serious</b> based on potential consequence                                           |
|                                               | No signature                      |                                                                                                                  | -                                                                                                                                                                                                                                                                                                                                                                      | <b>Significant</b> (governance issue)                                                                                                                                                                                |
|                                               | Start date incorrect/missing      |                                                                                                                  | -                                                                                                                                                                                                                                                                                                                                                                      | <b>Minor</b>                                                                                                                                                                                                         |
|                                               | CD requirements incorrect/missing |                                                                                                                  | -                                                                                                                                                                                                                                                                                                                                                                      | <b>Minor</b>                                                                                                                                                                                                         |
| 3. Allergy status missing/significant allergy | Significant allergy               | Includes allergy status not completed, or where a drug has been prescribed despite an allergy to that drug/class | -                                                                                                                                                                                                                                                                                                                                                                      | <b>Significant</b> allergy status/specific allergy missed off prescription; <b>Serious</b> if patient prescribed agent allergic to; <b>Potentially Lethal</b> if patient prescribed drug which previously had severe |

1  
2  
3  
4  
5  
6  
7  
8  
9  
10  
11  
12  
13  
14  
15  
16  
17  
18  
19  
20  
21  
22  
23  
24  
25  
26  
27  
28  
29  
30  
31  
32  
33  
34  
35  
36  
37  
38  
39  
40  
41  
42  
43  
44  
45  
46  
47  
48  
49

|                                                     |                                         |                                                                                                                                                |                                                                                                |                                                                                                                                                                                                                                                                                                                                   |
|-----------------------------------------------------|-----------------------------------------|------------------------------------------------------------------------------------------------------------------------------------------------|------------------------------------------------------------------------------------------------|-----------------------------------------------------------------------------------------------------------------------------------------------------------------------------------------------------------------------------------------------------------------------------------------------------------------------------------|
|                                                     |                                         |                                                                                                                                                |                                                                                                | reaction to eg. oedema                                                                                                                                                                                                                                                                                                            |
| <b>4. Duration of treatment wrong/not specified</b> | Continuation for longer than needed     | Includes no stop/review date for antibiotics, steroids etc                                                                                     | -                                                                                              | <b>Minor</b> if continuation of the medicine or the duration represents little potential for harm; <b>Significant</b> if continued >3 days longer than needed for medication such as: antibiotics, oral steroids, LMWH, potassium; <b>Serious</b> if ongoing treatment could cause serious harm                                   |
|                                                     | Premature discontinuation               | Includes drugs stopped without appropriate reducing course                                                                                     | -                                                                                              | <b>Minor</b> if discontinuation is unlikely to have a significant clinical impact; <b>Significant</b> if duration of treatment insufficient to treat condition eg. Antibiotics, or if no reducing course eg. Oral steroids                                                                                                        |
| <b>5. Drug Interactions</b>                         | Drug interaction                        | Excludes 2 items prescribed from same class e.g omeprazole with lansporazole (Duplication)                                                     | <b>Serious</b> if drug orders could exacerbate a patient's condition eg. Drug-drug interaction | <b>Significant</b> if manufacturer advises the combination is contraindicated, should be avoided, or advises caution; <b>Serious</b> if adverse events highly probable                                                                                                                                                            |
|                                                     | Drug interaction not taken into account | As above: unable to differentiate drug interaction and drug interaction not taken into account from available data                             |                                                                                                |                                                                                                                                                                                                                                                                                                                                   |
| <b>6. Omission of medication</b>                    | Omission on admission                   |                                                                                                                                                | <b>Significant</b> (regular medication)                                                        | -                                                                                                                                                                                                                                                                                                                                 |
|                                                     | Omission on discharge                   |                                                                                                                                                | <b>Significant</b>                                                                             | -                                                                                                                                                                                                                                                                                                                                 |
|                                                     | Drug not prescribed but indicated       |                                                                                                                                                | -                                                                                              | <b>Minor</b> if medication is unlikely to significantly impact patient care; <b>Significant</b> if medication would have significant impact on clinical course <b>Serious</b> if medication would alleviate a serious condition /patient is in acute distress; <b>Potentially lethal</b> if medication is potentially life saving |
| <b>7. Excessive/unnecessary</b>                     | Duplication                             | Includes a second agent prescribed which contains an ingredient already being taken; 2 drugs prescribed from the same class/with same clinical | <b>Minor</b> if duplicate therapy prescribed without potential for increased adverse events    | <b>Significant, Serious, Potentiallylethal:</b> As for overdose when duplicated items co-administered (3)                                                                                                                                                                                                                         |

|                                                |                                                |                                                                                                                                                  |                                                                                                                                                                                          |                                                                                                                                                                                         |
|------------------------------------------------|------------------------------------------------|--------------------------------------------------------------------------------------------------------------------------------------------------|------------------------------------------------------------------------------------------------------------------------------------------------------------------------------------------|-----------------------------------------------------------------------------------------------------------------------------------------------------------------------------------------|
| prescribing                                    |                                                | effect eg. Lansoprazole + omeprazole                                                                                                             |                                                                                                                                                                                          |                                                                                                                                                                                         |
| 8. Clinical Safety Errors                      | Unintentional prescription of drug             | Drug prescribed was not that desired. Includes prescription of a discontinued drug, excluding discontinuation due to ADR , or course is too long | -                                                                                                                                                                                        | Judgement used based on Equip severity categories                                                                                                                                       |
|                                                | No maximum dose                                | Excludes prescriptions with no frequency (administration times missing/incorrect)                                                                | <b>Minor</b> - order lacked specific drug, dose, strength, frequency or route information                                                                                                | <b>Significant</b> if no maximum dose stated for opioids                                                                                                                                |
|                                                | Clinical contraindication                      | Contraindication according to summary of product characteristics                                                                                 | <b>Serious</b> if drug orders could exacerbate a patient's condition eg. Drug-disease interaction                                                                                        | <b>Significant</b> if administration unlikely to have serious clinical consequences in the given situation                                                                              |
|                                                | Continuation after ADR                         |                                                                                                                                                  | -                                                                                                                                                                                        | Judgement used based on Equip severity categories                                                                                                                                       |
|                                                | No dosage alteration after levels out of range |                                                                                                                                                  | -                                                                                                                                                                                        | Judgement used based on Equip severity categories                                                                                                                                       |
| 9. Lack of clear directions for administration | Administration times incorrect/missing         | No frequency/times of dosing incorrect eg. In relation to food, morning vs night.                                                                | <b>Minor</b>                                                                                                                                                                             | <b>Significant</b> if administration time would be expected to affect treatment eg. Exenatide with meals, hypnotics at night                                                            |
|                                                | Incorrect route                                |                                                                                                                                                  | <b>Minor</b> if unlikely to be carried out/little chance of toxicity/therapeutic failure; <b>Significant</b> if wrong route to treat condition; <b>Serious</b> if potential for toxicity | -                                                                                                                                                                                       |
|                                                | IV instructions incorrect/missing              |                                                                                                                                                  | -                                                                                                                                                                                        | Judgement used based on Equip severity categories                                                                                                                                       |
|                                                | Route missing                                  |                                                                                                                                                  | <b>Minor</b> - order lacked specific drug, dose, strength, frequency or route information                                                                                                | -                                                                                                                                                                                       |
|                                                | Daily dose divided incorrectly                 | Number of dosing intervals incorrect. Excludes under/overdose                                                                                    | -                                                                                                                                                                                        | <b>Minor</b> if dosing intervals are not standard, but are unlikely to significantly affect treatment; <b>Significant</b> if dosing intervals are inappropriate to treat the condition; |

|                          |               |                                                                                                                                                                       |   |                                                                                                                                                                            |
|--------------------------|---------------|-----------------------------------------------------------------------------------------------------------------------------------------------------------------------|---|----------------------------------------------------------------------------------------------------------------------------------------------------------------------------|
|                          |               |                                                                                                                                                                       |   | <b>Serious</b> if medication has narrow TI and dosing intervals may affect toxicity/efficacy eg. Parenteral aminoglycosides                                                |
| <b>10. Miscellaneous</b> | No indication | Includes PRN medications, where lack of indication on prescription could prevent administration. Excludes failure to write an indication when prescribing antibiotics | - | <b>Minor</b> if indication not written up for PRN medication; <b>Significant</b> if indication not written up for formulations which are licensed for specific conditions. |
|                          | Miscellaneous | Illegible drug details, non-standard abbreviations, patient details incorrect/missing, warfarin fixed dose prescribed.                                                | - | Judgement used based on Equip severity categories                                                                                                                          |

Abbreviations: TI- therapeutic index, CD- controlled drug, ADR- adverse drug reaction, PRN- when required

Table 3. Summary data showing prevalence and severity of errors observed

|                             |                 | Total Prescriptions | One or more error reported |                        | Error Severity         |                        |                      |                        | Total errors |
|-----------------------------|-----------------|---------------------|----------------------------|------------------------|------------------------|------------------------|----------------------|------------------------|--------------|
|                             |                 |                     | No (%)                     | Yes (%)                | Minor (%)              | Significant (%)        | Serious (%)          | Potentially Lethal (%) |              |
| <b>All</b>                  |                 | <b>4238</b>         | <b>2381<br/>(56.2)</b>     | <b>1857<br/>(43.8)</b> | <b>1264<br/>(42.0)</b> | <b>1629<br/>(54.1)</b> | <b>109<br/>(3.6)</b> | <b>9<br/>(0.3)</b>     | <b>3011</b>  |
| <b>Prescriber Grade</b>     | Newly Qualified | 1805                | 1087<br>(60.2)             | 718<br>(39.8)          | 519<br>(48.8)          | 507<br>(47.7)          | 35<br>(3.3)          | 3<br>(0.3)             | 1064         |
|                             | Junior          | 1484                | 755<br>(50.9)              | 729<br>(49.1)          | 496<br>(39.2)          | 725<br>(57.4)          | 41<br>(3.2)          | 2<br>(0.2)             | 1264         |
|                             | Mid Grade       | 366                 | 190<br>(51.9)              | 176<br>(48.1)          | 93<br>(33.6)           | 166<br>(59.9)          | 15<br>(5.4)          | 3<br>(1.1)             | 277          |
|                             | Senior          | 142                 | 96<br>(67.6)               | 46<br>(32.4)           | 36<br>(42.4)           | 43<br>(50.6)           | 6<br>(7.1)           | 0<br>(0)               | 85           |
|                             | Non-medical     | 35                  | 26<br>(74.3)               | 9<br>(25.7)            | 8<br>(57.1)            | 5<br>(35.7)            | 1<br>(7.1)           | 0<br>(0)               | 14           |
|                             | unknown/other   | 406                 | 227<br>(55.9)              | 179<br>(44.1)          | 112<br>(36.5)          | 183<br>(59.6)          | 11<br>(3.6)          | 1<br>(0.3)             | 307          |
| <b>Training</b>             | Liverpool       | 1290                | 787<br>(61.0)              | 503<br>(39.0)          | 270<br>(35.4)          | 456<br>(59.8)          | 36<br>(4.7)          | 1<br>(0.1)             | 763          |
|                             | Non-Liverpool   | 922                 | 478<br>(51.8)              | 444<br>(48.2)          | 342<br>(43.8)          | 420<br>(53.8)          | 19<br>(2.4)          | 0<br>(0)               | 781          |
|                             | Unknown         | 2026                | 1118<br>(55.2)             | 908<br>(44.8)          | 652<br>(44.4)          | 753<br>(51.3)          | 54<br>(3.7)          | 8<br>(0.5)             | 1467         |
| <b>Admission/ Discharge</b> | Discharge       | 2467                | 1615<br>(65.5)             | 852<br>(34.5)          | 685<br>(52.5)          | 584<br>(44.8)          | 32<br>(2.5)          | 4<br>(0.3)             | 1305         |
|                             | Admission       | 1744                | 756<br>(43.4)              | 988<br>(56.7)          | 576<br>(34.2)          | 1030<br>(61.1)         | 75<br>(4.4)          | 5<br>(0.3)             | 1686         |
|                             | Unknown         | 27                  | 12<br>(44.44)              | 15<br>(55.55)          | 3<br>(15)              | 15<br>(75)             | 2<br>(10)            | 0<br>(0)               | 20           |
| <b>Ward Area</b>            | Medicine        | 2059                | 1083<br>(52.6)             | 976<br>(47.4)          | 634<br>(39.0)          | 921<br>(56.7)          | 64<br>(3.9)          | 6<br>(0.37)            | 1625         |

|                               |                      |      |               |                                               |               |               |             |            |     |
|-------------------------------|----------------------|------|---------------|-----------------------------------------------|---------------|---------------|-------------|------------|-----|
|                               | Surgery              | 1395 | 836<br>(59.9) | 559<br>(40.1)                                 | 448<br>(50.1) | 417<br>(46.6) | 27<br>(3.0) | 2<br>(0.2) | 894 |
|                               | Mental health        | 96   | 66<br>(68.8)  | 30<br>(31.3)                                  | 24<br>(60)    | 16<br>(40)    | 0<br>(0)    | 0<br>(0)   | 40  |
|                               | Accident & Emergency | 8    | 1<br>(12.5)   | 7<br>(87.5)                                   | 1<br>(9.1)    | 10<br>(90.9)  | 0<br>(0)    | 0<br>(0)   | 11  |
|                               | Critical care        | 17   | 14<br>(82.4)  | 3<br>(17.7)                                   | 1<br>(25.0)   | 3<br>(75.0)   | 0<br>(0)    | 0<br>(0)   | 4   |
|                               | Unknown              | 663  | 383<br>(57.8) | 280<br>(42.2)                                 | 156<br>(35.7) | 262<br>(60.0) | 18<br>(4.1) | 1<br>(0.2) | 437 |
| <b>Prescription contains#</b> | Antibiotic           | 724  | 301<br>(41.6) | 423 (58.4)<br><b>(Antibiotic: 130 (18.0))</b> | 57<br>(29.8)  | 118<br>(61.8) | 16<br>(8.4) | 0<br>(0)   | 191 |
|                               | Insulin              | 129  | 42<br>(32.6)  | 87 (67.4)<br><b>Insulin: 20 (15.5)</b>        | 12<br>(37.5)  | 19<br>(59.4)  | 1<br>(3.1)  | 0<br>(0)   | 32  |
|                               | Warfarin             | 196  | 71<br>(36.2)  | 125 (63.8)<br><b>Warfarin: 18 (9.2)</b>       | 6<br>(23.1)   | 16<br>(61.5)  | 4<br>(15.4) | 0<br>(0)   | 26  |
|                               | Oxygen               | 36   | 7<br>(19.4)   | 29 (80.6)<br><b>Oxygen: 2 (5.6)</b>           | 1<br>(14.3)   | 5<br>(71.4)   | 1<br>(14.3) | 0<br>(0)   | 7   |

\* Relates to errors per prescriptions written, not errors per number of items prescribed

# Error severities, total errors and error rates relate to errors associated with Antibiotics/Insulin/Warfarin/Oxygen only

**Table 4.** Summary of the Errors Observed which were Considered to be Potentially Lethal

| Error Description                                                                                                | Category                                       | Prescriber Grade | Ward Area | Admission/ Discharge |
|------------------------------------------------------------------------------------------------------------------|------------------------------------------------|------------------|-----------|----------------------|
| Gliclazide 400mg prescribed when 40mg needed                                                                     | 1- Dosing Errors                               | Newly qualified  | Medicine  | Discharge            |
| Digoxin 625micrograms prescribed when 62.5micrograms needed                                                      | 1- Dosing Errors                               | Newly qualified  | Medicine  | Discharge            |
| Oxycodone 500mg prescribed: overdose                                                                             | 1- Dosing Errors                               | Mid Grade        | Surgery   | Admission            |
| Methotrexate prescribed daily, not weekly                                                                        | 1- Dosing Errors                               | Junior           | Medicine  | Admission            |
| Doxazocin prescribed; had been stopped by general practitioner due to angioedema                                 | 3. Allergy status missing/ significant allergy | Junior           | Medicine  | Admission            |
| Phenytoin dose of 300mg daily incorrectly prescribed as 800mg                                                    | 1- Dosing Errors                               | Newly Qualified  | Medicine  | Discharge            |
| Midazolam IV for sedation: overdose                                                                              | 1- Dosing Errors                               | Mid Grade        | Unknown   | Admission            |
| Amiodarone loading dose of 200mg three times daily continued as a regular dose                                   | 1- Dosing Errors                               | Other            | Surgery   | Discharge            |
| Enoxaparin prescribed 1mg/kg once daily instead of 1mg/kg twice daily for a patient with acute coronary syndrome | 1- Dosing Errors                               | Mid Grade        | Medicine  | Admission            |



**Table 5.** Univariate statistics showing the significance of explanatory variables in predicting error rates in prescriptions.

| Variable                                                     | n    | ≥1 Error<br>n (%)     | No Error<br>n (%)    | Difference (95%CI)       | p-value |
|--------------------------------------------------------------|------|-----------------------|----------------------|--------------------------|---------|
| Prescriber Grade (n=3850)                                    |      | 1689                  | 2161                 |                          |         |
| <i>Newly qualified</i>                                       | 1803 | 716 (42%)             | 1087 (50%)           | -8% (-11.2% to -4.8%)    | <0.001  |
| <i>Junior</i>                                                | 1482 | 727 (43%)             | 755 (35%)            | 8% (4.9% to 11.1%)       |         |
| <i>Mid-grade</i>                                             | 366  | 176 (10%)             | 190 (8.8%)           | 1.2% (-0.7% to 3.1%)     |         |
| <i>Senior</i>                                                | 142  | 46 (2.7%)             | 96 (4.4%)            | -1.7% (-2.8% to -0.4%)   |         |
| <i>Non-medical</i>                                           | 35   | 9 (0.5%)              | 26 (1.2%)            | -0.7% (-1.3% to -0.1%)   |         |
| <i>Other</i>                                                 | 22   | 15 (0.9%)             | 7 (0.3%)             | 0.56% (0.1% to 1.1%)     |         |
| Discharge/Admission (n=3065)                                 |      | 1135                  | 1930                 |                          |         |
| Discharge                                                    | 2467 | 853 (75%)             | 1614 (84%)           | -9% (-12.0% to -6.0%)    | <0.001  |
| Admission                                                    | 598  | 282 (25%)             | 316 (16%)            |                          |         |
| Liverpool trained (n=1325)                                   |      | 518                   | 807                  |                          |         |
| <i>Liverpool</i>                                             | 35   | 14 (2.7%)             | 21 (2.6%)            | 0.1% (-1.7% to 1.9%)     | 0.911   |
| <i>Non-Liverpool</i>                                         | 1290 | 504 (97%)             | 786 (97%)            |                          |         |
| Hospital (n=4238)                                            |      | 1857                  | 2381                 |                          |         |
| <i>Hospital A</i>                                            | 762  | 366 (20%)             | 396 (17%)            | 3% (0.6% to 5.4%)        | <0.001  |
| <i>Hospital B</i>                                            | 513  | 239 (12%)             | 274 (12%)            | 0% (-2.0% to 2.0%)       |         |
| <i>Hospital C</i>                                            | 500  | 296 (16%)             | 204 (8.6%)           | 7.4% (5.4% to 9.4%)      |         |
| <i>Hospital D</i>                                            | 97   | 30 (1.6%)             | 67 (2.8%)            | -1.2% (-2.1% to -0.3%)   |         |
| <i>Hospital E</i>                                            | 371  | 160 (8.6%)            | 211 (8.9%)           | -0.3% (-2.0% to 1.4%)    |         |
| <i>Hospital F</i>                                            | 604  | 355 (19%)             | 249 (10%)            | 9% (6.8% to 11.2%)       |         |
| <i>Hospital G</i>                                            | 86   | 22 (1.2%)             | 64 (2.7%)            | -1.5% (-2.3% to -0.7%)   |         |
| <i>Hospital H</i>                                            | 807  | 290 (16%)             | 517 (22%)            | -6% (-8.4% to -3.6%)     |         |
| <i>Hospital I</i>                                            | 498  | 99 (5.3%)             | 399 (17%)            | -11.7% (-13.5% to -9.9%) |         |
| Ward Area (n=3575)                                           |      | 1577                  | 1998                 |                          |         |
| <i>Medical</i>                                               | 2059 | 977 (62%)             | 1082 (54%)           | 8% (4.8% to 11.2%)       | <0.001  |
| <i>Surgical</i>                                              | 1395 | 560 (36%)             | 835 (42%)            | -6% (-9.2% to -2.8%)     |         |
| <i>Accident &amp; Emergency</i>                              | 8    | 7 (0.4%)              | 1 (0.1%)             | 0.3% (-0.04% to 0.6%)    |         |
| <i>Mental health</i>                                         | 96   | 30 (1.9%)             | 66 (3.3%)            | -1.4% (-2.4% to -0.4%)   |         |
| <i>Critical care</i>                                         | 17   | 3 (0.2%)              | 14 (0.7%)            | -0.5% (-0.9% to -0.1%)   |         |
| Number of Medicines on Prescription (n=3386)<br>Median (IQR) |      | 8; (4,11)<br>(n=1435) | 4; (2,7)<br>(n=1951) | -4 (-4.5, -3.5)          | <0.001  |

n= number of prescriptions

**Table 6.** Multivariate logistic regression analysis for predicting error rates in prescriptions.

| Variable                          | Odds ratio (95%CI)  | p-value |
|-----------------------------------|---------------------|---------|
| <b>Hospital</b>                   |                     |         |
| <i>Hospital H</i>                 | 1                   |         |
| <i>Hospital A</i>                 | Not estimable*      |         |
| <i>Hospital B</i>                 | 1.11 (0.78 to 1.58) | 0.57    |
| <i>Hospital C</i>                 | 2.38 (1.63 to 3.46) | <0.001  |
| <i>Hospital D</i>                 | 0.64 (0.13 to 3.06) | 0.57    |
| <i>Hospital E</i>                 | 1.39 (0.96 to 2.01) | 0.08    |
| <i>Hospital F</i>                 | 3.53 (2.63 to 4.73) | <0.001  |
| <i>Hospital G</i>                 | 1.80 (1.03 to 3.12) | 0.04    |
| <i>Hospital I</i>                 | 1.11 (0.73 to 1.70) | 0.62    |
| <b>Prescriber Grade</b>           |                     |         |
| <i>Newly qualified</i>            | 1                   |         |
| <i>Junior</i>                     | 1.06 (0.85 to 1.32) | 0.61    |
| <i>Mid-grade</i>                  | 0.96 (0.64 to 1.44) | 0.83    |
| <i>Senior</i>                     | 0.97 (0.58 to 1.63) | 0.92    |
| <i>Non-medical</i>                | 0.59 (0.21 to 1.64) | 0.31    |
| <i>Other</i>                      | 1.50 (0.53 to 4.23) | 0.44    |
| <b>Discharge/Admission</b>        | 1.16 (0.70 to 1.92) | 0.58    |
| <b>Number of prescribed items</b> | 1.14 (1.12 to 1.17) | <0.001  |

Analysis contains only 2127 records (50.2%) where complete data was provided for all variables

\* Trust provided no data on number of prescription items

1  
2  
3  
4 **Cross Sectional Study of Prescribing Errors in Patients Admitted to Nine Hospitals**  
5 **Across North West England**  
6  
7

8  
9 Seden K<sup>1,2</sup>, Kirkham JJ<sup>3</sup>, Kennedy T<sup>2</sup>, Lloyd M<sup>4</sup>, James S<sup>5</sup>, Mcmanus A<sup>5</sup>, Ritchings A<sup>6</sup>,  
10 Simpson J<sup>7</sup>, Thornton D<sup>8</sup>, Gill A<sup>9</sup>, Coleman C<sup>10</sup>, Thorpe B<sup>11</sup>, Khoo SH<sup>1,2</sup>  
11

12  
13  
14 NIHR Biomedical Research Centre, Royal Liverpool and Broadgreen University Hospital  
15 Trust, Liverpool, UK<sup>1</sup>; Faculty of Health & Life Sciences, University of Liverpool, Liverpool,  
16 UK<sup>2</sup>; Department of Biostatistics, University of Liverpool, Liverpool, UK<sup>3</sup>; Pharmacy  
17 Department, Whiston Hospital- St Helens and Knowsley Teaching Hospitals NHS Trust,  
18 Whiston, UK<sup>4</sup>; Pharmacy Department, Royal Liverpool and Broadgreen University Hospitals  
19 NHS Trust, Liverpool, UK<sup>5</sup>; Pharmacy Department, Mid Cheshire Hospitals NHS Foundation  
20 Trust, Cheshire, UK<sup>6</sup>; Pharmacy Department, Warrington and Halton Hospitals NHS  
21 Foundation Trust, Warrington, UK<sup>7</sup>; Pharmacy Department, Aintree University Hospitals  
22 NHS Foundation Trust, Liverpool, UK<sup>8</sup>; Pharmacy Department, Alder Hey Children's Hospital  
23 NHS Foundation Trust, Liverpool, UK<sup>9</sup>; Pharmacy Department, Nobles Hospital, Douglas,  
24 Isle of Man, UK<sup>10</sup>; Pharmacy Department, Cheshire and Wirral Partnership NHS Foundation  
25 Trust, Wirral, UK<sup>11</sup>  
26  
27  
28  
29  
30  
31

32 Corresponding Author: Saye Khoo  
33 Pharmacology Research Laboratories  
34 H Block, 1<sup>st</sup> Floor  
35 70 Pembroke Place  
36 Liverpool  
37 L69 3GF, UK  
38 [Khoo@liv.ac.uk](mailto:Khoo@liv.ac.uk)  
39  
40  
41  
42  
43  
44  
45  
46  
47  
48  
49  
50  
51  
52  
53  
54  
55  
56  
57  
58  
59  
60

## Article Summary

### 1. Article Focus

- Some studies have reported lower error rates with more senior prescriber grades, and insufficient undergraduate prescriber training as a potential risk for prescribing errors
- Prescriptions frequently contain multiple medications, but data about errors on complete prescriptions (all prescribed items on an inpatient chart or discharge prescription), which give a better estimate of numbers of patients at risk of harm, are lacking
- We aimed to determine the differences in prescribing error rates between grades of prescriber, ward area, admission or discharge and type of medication prescribed

### 2. Key Messages

- We observed an error rate of 10.9% per prescribed item, with only 56.2% of 4238 complete prescriptions remaining error free.
- In multivariate analysis, the strongest predictor for prescribing error was the number of medicines on each prescription.
- We found no overall difference in error rate amongst different grades of prescriber, and newly qualified doctors were not more likely to make errors than their senior colleagues.

### 3. Strengths and Limitations

- This was a large study across nine diverse hospital settings
- We determined the rate of errors on complete prescriptions as well as for individually prescribed items, giving a better estimate of the numbers of patients affected by errors.
- We did not evaluate the impact of electronic prescribing on the prevalence and type of prescribing errors, however up to a quarter of the errors observed could potentially have been avoided through use of electronic prescribing and medicines administration systems

## Abstract

**Objective** To evaluate the prevalence, type and severity of prescribing errors observed between grades of prescriber, ward area, admission or discharge, and type of medication prescribed

**Design** Ward-based clinical pharmacists prospectively documented prescribing errors at the point of clinically checking admission or discharge prescriptions. Error categories and severities were assigned at the point of data collection, and verified independently by the study team

**Setting** Prospective study of nine diverse National Health Service (NHS) hospitals in North West England, including teaching hospitals, district hospitals and specialist services for paediatrics, women and mental health.

**Results** Of 4238 prescriptions evaluated, one or more error was observed in 1857 (43.8%) prescriptions, with a total of 3011 errors observed. Of these, 1264 (41.9%) were minor, 1629 (54.1%) were significant, 109 (3.6%) were serious and 9 (0.30%) were potentially life-threatening. The majority of errors considered to be potentially lethal (n=9) were dosing errors (n=8), mostly relating to overdose (n=7). The rate of error was not significantly different between newly qualified doctors compared with junior, middle grade or senior doctors. Multivariable analyses revealed the strongest predictor of error was the number of items on a prescription (risk of error increased 14% for each additional item). We observed a high rate of error from medication omission, particularly amongst patients admitted acutely into hospital. Electronic prescribing systems could potentially have prevented up to a quarter of (but not all) errors.

**Conclusions** In contrast to other studies, prescriber experience did not impact on overall error rate (although there were qualitative differences in error category). Given that multiple drug therapies are now the norm for many medical conditions, health systems should introduce and retain safeguards which detect and prevent error, in addition to continuing training and education, and migration to electronic prescribing systems.

## Introduction

Prescribing errors are common, with systematic reviews suggesting that as many as 50% of hospital admissions and 7% of medication orders are affected.<sup>1</sup> In recent studies, prescribing errors have been found to affect approximately 9-15% of medication orders for hospital inpatients in the United Kingdom (UK).<sup>2,3</sup> Over one third of 651 patients were found to have a prescribing error occurring at hospital admission in the United States (US).<sup>4</sup> Prescribing errors are also prevalent in primary care, affecting 37% of 9385 prescriptions in the US,<sup>5</sup> and one in eight patients (one in 20 prescription items) in the UK.<sup>6</sup> A study in the Netherlands evaluating medication omission errors in elderly patients admitted to hospital reported adverse consequences in 21% of 100 patients.<sup>8</sup>

Human error in healthcare may be considered in the context of individuals or health systems.<sup>9-11</sup> While personal factors such as forgetfulness, inattention, poor motivation, carelessness, negligence, and recklessness are important, a health systems approach more comprehensively addresses recurrent errors and organisation factors and processes which may give rise to that error. The person, the team, the task, the workplace and the institution as a whole are considered,<sup>9</sup> which identify weaknesses in the system's defences.<sup>9</sup> For example, higher hospital mortality at weekends may be associated with lower numbers of senior staff available outside of the normal working week.<sup>12,13</sup> Barriers which may prevent medication errors, or prevent errors from reaching the patient, may include electronic prescribing alerts, and prescription review by clinical pharmacists.

Data on factors which may contribute to prescribing errors, for example differences between grades of prescriber, ward area, admission or discharge and type of medication prescribed are sparse.<sup>3,14,15</sup> Existing data suggest that newly qualified and junior doctors are twice as likely to make prescribing errors than senior doctors, taking into account the larger volume of prescriptions written by junior prescriber grades.<sup>3</sup> Provision of sufficient undergraduate training to allow medical students to become safe prescribers when they begin work as newly qualified doctors is widely recognised as an important factor in reducing prescribing errors.<sup>14,16-18</sup> Teaching in UK medical schools has changed considerably over the last decade, with the General Medical Council stipulating that medical students must be adequately prepared to prescribe drugs and manage risk at the point of graduation.<sup>19,20</sup>

Whilst previous studies have evaluated error for individual medications, few studies have systematically evaluated complete prescriptions (all items included on a single inpatient prescription chart or discharge prescription at the time of clinical pharmacist check) to evaluate factors associated with prescribing error.<sup>1-3</sup> This is important as it gives a more accurate estimate of the numbers of patients who are potentially put at risk of harm by prescribing errors. We undertook a prospective survey of prescribing errors in nine diverse National Health Service (NHS) hospitals in the North West of England, aiming to examine the differences in prescribing error rates between grades of prescriber, ward area, admission or discharge, hospitals and the type and number of medicines prescribed. In order to further evaluate the role of undergraduate training, we also tested for a relationship between occurrence of error and medical school training of prescribers. As approximately 30% of the prescribers were trained at the local institution, the University of Liverpool, whether medical training was undertaken at this institution was included in the analysis. Univariate analysis and multivariate logistic regression was used to evaluate factors associated with prescribing errors.

## Methods

### Setting

A total of nine NHS hospitals from the Merseyside and Cheshire region took part in the audit. These comprised large teaching hospitals, general hospitals, specialist centres for paediatrics, women's health and mental health (Table 1). One hospital was using complete electronic prescribing systems (inpatient prescribing, medication ordering, discharge prescriptions) on some wards at the time of the audit. Eight of the hospitals were using paper prescription charts for inpatients and either handwritten or transcribed electronically generated discharge prescriptions. In this setting, ward-based clinical pharmacists check inpatient prescriptions at, or soon after patient admission, when medicines reconciliation is undertaken. Inpatient prescription charts are then checked at least daily by the pharmacist. Discharge prescriptions are checked and authorised by a clinical pharmacist prior to supply of medication. Pharmacists may amend or clarify some aspects of prescribing, or discuss with the clinical team any recommendations or safety issues at these points of care. Clinical pharmacists may also participate in ward rounds and multidisciplinary team meetings, where prescribing may be discussed with clinicians, clarified or amended.

### Data Collection

As this was an audit of unlinked anonymised prescriptions, Ethics approval was not required in accordance with local guidance. We aimed to capture data from all seven hospital trusts in the region. Two additional hospitals adjacent to and linked with healthcare provision in the Merseyside region were also audited. The number of prescriptions audited was empirically determined in order to generate a sample size equivalent to a large study recently undertaken in the UK.<sup>3</sup> In order to audit practice across the region, each hospital was asked to audit a minimum of 400 prescriptions.

We adopted the following definition of prescribing errors for the study, which excludes adherence to local prescribing policy and guidelines: "A clinically meaningful prescribing error occurs when, as a result of a prescribing decision or prescription writing process, there is an unintentional significant: (1) reduction in the probability of treatment being timely and effective or (2) increase in the risk of harm when compared with generally accepted practice".<sup>21</sup> A standard questionnaire collected data on error category and severity (based on EQUIP error classifications). The EQUIP study was a large prospective survey of prescribing errors affecting hospital inpatients in the UK,<sup>3</sup> and the error classifications were therefore considered relevant to our setting. Nominated ward-based clinical pharmacists prospectively documented prescribing errors at the point of checking inpatient or discharge prescriptions, during normal pharmacy working hours, therefore each audit form was a point prevalence of prescribing errors at the time of pharmacist clinical check. Acute admission was defined as the first 24 hours in hospital. For all prescription sheets generated in acute admission settings, a separate audit form was completed (to allow for emergency prescribing in the absence of a full drug history without this being recorded as an error) and we sought to record only unintended medication omissions (e.g. following medicines reconciliation with general practices or primary healthcare databases). Hospitals were advised to complete the study on different days of the week throughout the period of the audit, in order to capture an even spread of days. For example data collection would occur weekly, on Monday in week one, Tuesday in week two, Wednesday in week three, in order to minimise double auditing of the same patient on admission to hospital and subsequent admission to a ward. Therefore, if patients were audited twice, an interval of at least one week would separate each audit form, unless their acute admission/inpatient /discharge prescription were audited

1  
2  
3 on the same day. If items on prescriptions had been previously screened, they would be  
4 counted again in any subsequent auditing, though there would be a one week interval since  
5 previous auditing, or the patient would be a different stage of hospital admission. All types of  
6 medication order were audited, including IV fluids, when required and once only medication.  
7  
8  
9

### 10 **Prescriber Category**

11 Pharmacists were required to indicate the category of prescribers on data collection forms.  
12 For this analysis, prescribers were categorised as follows: newly qualified (foundation year 1,  
13 house officers), junior (foundation year 2, specialist or 'core' training years 1 & 2), mid grade  
14 (specialist registrars, training fellows), senior (consultant), non-medical (nurse or pharmacist  
15 prescribers), other (for example locum doctors for whom grade was unclear) and unknown  
16 (no information concerning prescriber recorded).  
17  
18

### 19 **Grading of prescribing errors**

20 We modified EQUIP study criteria<sup>3</sup> for error categorisation and severity classification by  
21 adding or clarifying severity criteria for all error categories, and by grouping errors into ten  
22 distinct areas according to stage of the prescribing process (see below and Table 2).  
23 'Exclusion' and 'inclusion' of errors into EQUIP study error types were defined, in order to  
24 differentiate categories with potential overlap. Severity ratings were further defined and  
25 assigned to each error category based on modified EQUIP study criteria and taking into  
26 account the perceptions of the original pharmacist gradings. Severity ratings related to the  
27 potential severity, had the error been allowed to progress through to the patient, as the  
28 majority of errors were corrected prior to the point of administration. In order to limit  
29 misclassification of errors, the original 29 EQUIP categories were batched into 10 different  
30 types of error groups as follows: (1) Dosing errors, (2) Writing errors, (3) Allergy status  
31 errors, (4) Duration of treatment wrong/not specified, (5) Drug interactions, (6) Omission of  
32 medication, (7) Excessive/unnecessary prescribing, (8) Clinical safety errors, (9) Lack of  
33 clear directions for administration, (10) a new error category (Miscellaneous) was added  
34 (Table 2 ). The modification and definition of error categories and severities was undertaken  
35 by two members of the study team (KS, SK) and agreed by a third (TK).  
36  
37  
38  
39

40 Despite using a standard set of definitions, we noted discrepancies across various hospitals  
41 in both error categorisation and severity rating. In particular there was a tendency to over-  
42 report errors and to overestimate their potential severity. This was confirmed by a *post-hoc*  
43 inter-rater agreement analysis. A set of six sample prescriptions was generated. A list of 14  
44 sample errors was decided by the study team, including study error type and severity,  
45 according to the criteria in Table 2 utilised for analysis of the main study. The errors selected  
46 occurred frequently in the main study, and covered a broad range of error categories and  
47 severities. Six pharmacists from each participating hospital were asked to each screen the  
48 six prescription scenarios containing the 14 errors and to record any observed errors,  
49 allocating error types and severities. The exact agreement percentages between category  
50 classification, severity classification and both combined were computed to measure the  
51 absolute concordances between pharmacist scores against the gold standard assessment.  
52  
53  
54

55 In order to limit inter-observer bias, all grading and severity of errors identified in the main  
56 study were independently reassessed by two members of the study team (KS and SK), with  
57 discordant assessments collectively discussed with a third (TK) in order to agree a final  
58 categorisation for error type and severity. For severity ratings, the summary of product  
59 characteristics for relevant medication was consulted, in order to determine potential  
60



1  
2  
3 implications of different degrees of overdose, underdose, of drug interactions, and also to  
4 confirm clinical contra-indications.  
5

### 6 7 **Statistical Analyses**

8  
9 Data were analysed at the prescription level using complete case data. The prevalence and  
10 severity of errors observed were tabulated using percentage frequencies. A Forest plot  
11 was produced to present the error prevalence rate and 95% confidence interval (95% CI) for  
12 each hospital and grade of prescriber. For the formal statistical analysis, when there was  
13 more than one error on a prescription, only the most severe error was included. This  
14 approach was used to ensure that the errors included in the analysis were independent. In  
15 this study, we assessed hospital, prescriber grade (newly qualified, junior, mid-grade, senior,  
16 non-medical, other), ward area (medical, surgical, A&E, mental health, critical care), number  
17 of prescribed medicines, an indicator to denote whether the prescription was prescribed on  
18 admission or on discharge and an indicator to denote whether the prescriber was Liverpool  
19 trained or not as potential risk factors. Univariate statistical analyses were performed using a  
20 chi-squared test except for continuous data, which were analysed using the Mann-Whitney U  
21 test. A multivariate logistic regression model for a prescription error was fitted to the data.  
22 Results are given in terms of an odds ratio (OR) and associated 95% CI. All risk factors that  
23 were statistically significant ( $p < 0.1$ ) in the univariate analysis were considered for inclusion in  
24 the multivariate model with the exception of ward area as a number of hospitals only  
25 reported a single specialty type.  
26

27  
28 All statistical analysis was carried out using the statistical software package SPSS (version  
29 20) using a two-sided significance level of 0.05 (5%) throughout.  
30  
31  
32  
33  
34  
35  
36  
37  
38  
39  
40  
41  
42  
43  
44  
45  
46  
47  
48  
49  
50  
51  
52  
53  
54  
55  
56  
57  
58  
59  
60

## Results

### *Error Classification*

During the *post-hoc* inter-rater agreement analysis, approximately 75% of error categories were correctly identified by pharmacists when compared to the standards. Only 47% of severity ratings were concordant with the standards, and 40% of pharmacists rated both error category and severity in concordance with the standards.

Re-assessment of errors by the study team resulted in exclusion of a total of 143 errors which were not considered true errors of the process of prescribing. The error category was re-graded for 434 errors, and severity was re-graded for 724 errors, which was predominantly a down-grading.

### *Descriptive data and severity of errors*

A total of 4238 prescriptions were evaluated; of these, 1857 (43.8%) prescriptions contained at least one error (Table 3). The overall prevalence of prescribing errors (number of prescriptions with one or more error/prescriptions evaluated) ranged from 20% to 60% across the nine hospitals (Figure 1). The rate of errors per prescribed item was 10.9%.

A total of 3011 individual errors were observed within the 1857 prescriptions containing an error. Of these 3011 errors, 1264 (41.9%) were minor, 1629 (54.1%) were significant, 109 (3.6%) were serious and nine (0.30%) were potentially life-threatening (Table 3). Details of all potentially life-threatening errors are listed in Table 4 and mainly comprised dosing errors (n=8), particularly overdose (n=7), with one incidence of under dose. A further error considered to be potentially lethal related to prescription of a medicine to which the patient had previously had a serious allergic reaction.

The proportion of errors categorised with severity as significant or higher by prescriber grade were as follows: all prescribers 58.0%, newly qualified 51.2%, junior 60.8%, mid grade 66.4%, senior 57.6% ( $\chi^2_{\text{trend}} p < 0.001$  for univariate analysis, although this association disappeared when corrected for other potential confounders)(Table 3).

Fewer errors were observed on discharge prescriptions than on prescriptions written on admission. More errors were observed in prescriptions containing antibiotics, insulin, warfarin and oxygen, although this does not take into account the number of items on each prescription. Whether doctors were Liverpool trained or not did not affect the number of errors observed (Table 3).

Differences in error prevalence and error types were observed in individual participating hospitals. The lowest rates of errors were reported for the paediatrics specialty hospital, with 0.07 errors observed per prescribed item, and 0.26 errors observed per prescription. However, in multivariate analysis, there was no significant reduction in error risk and it is likely that the effect could be due to lower number of items per prescription (mean 3.5, vs pooled data: 6.3). The most common error types were dosing errors (30%) and medication omission (23.1%).

Significantly lower risk of errors was observed in the hospital providing specialist services for women ( $p=0.04$ , Table 6) in multivariate analysis. One of the lowest error rates per prescription was observed (0.28), although the error rate per prescribed item (0.11) was

1  
2  
3 equal to that of the pooled data. The most common error type observed was  
4 excessive/unnecessary prescribing (50%). No errors of medication omission were observed.  
5 This hospital also had a low number of items per prescription (2.4), and was using electronic  
6 prescribing systems on some wards.  
7  
8

### 9 10 *Error types*

11  
12 The most frequent error types for all prescribers were medication omission, accounting for  
13 26.9%, writing errors accounting for (20.7%) and dosing errors accounting for (20.6%) of all  
14 errors recorded. There was little difference in the variability of error types across different  
15 prescriber grades (Figure 2).  
16  
17

### 18 19 *Risk factor analysis*

20  
21 Results of the univariate analysis are shown in Table 5. Missing data limited inclusion of all  
22 reported prescriptions in risk factor analysis, notably as one acute hospital failed to return  
23 data on number of items on each prescription. All factors considered appeared to show a  
24 significant difference except for ~~medical school training of doctors~~whether doctors had  
25 trained in Liverpool, which made no significant difference ( $p=0.91$ ) to whether an error  
26 occurred on the prescription. Multivariate risk factor analysis showed that the likelihood of  
27 an error increased for every additional item included on the prescription (OR 1.14, 95% C  
28 1.12, 1.17,  $p<0.001$ ) (Table 5). Therefore, for each additional item on the prescription, the  
29 risk of an error occurring increased by about 14%. There was also a trend towards errors  
30 being more likely to occur on admission prescriptions than on discharge prescriptions, with  
31 an odds ratio (OR) of 1.16 (95% CI 0.70, 1.92,  $p=0.58$ ), although this difference did not  
32 reach statistical significance (Table 6). No significant differences were found in error rates  
33 between different prescriber grades, when compared to newly qualified doctors (Figure 2,  
34 Figure 3) in multivariate analyses.  
35  
36  
37  
38  
39  
40

### 41 **Discussion**

42  
43 In this large study, only 56.2% of 4238 prescriptions written had no reported errors. Of the  
44 errors recorded, 41.9% were minor, 54.1% significant, 3.6% serious and 0.3% potentially life  
45 threatening. It is important to note that severity ratings relate to the potential severity had  
46 the error been allowed to progress through to the patient - in fact the majority of errors were  
47 corrected prior to the point of administration. In multivariate analysis, the strongest predictor  
48 for prescribing error was the number of medicines on each prescription, with risk for  
49 prescribing error increasing by 14% for every additional medication item prescribed. Where  
50 data were available, prescriptions contained an average of 6.3 medication items, although  
51 this varied from 2.4 – 7.5 items according to medical specialty surveyed. Uncorrected  
52 analyses suggested that errors were frequent in prescriptions containing insulin (15.5%),  
53 antibiotics (18%), warfarin (9.2%) and oxygen (5.6%), although these patients were very  
54 likely to have been receiving multiple medications. Error rates were highest amongst  
55 specialties which prescribed a broad range of medications (e.g. acute medicine, compared  
56 to elective surgery), and also differed between different hospital Trusts, with hospitals  
57 specialising in paediatrics, maternal health and mental health exhibiting the lowest error  
58  
59  
60

1  
2  
3 rates. However, when corrected for number of medications, these differences did not remain  
4 significant, with the exception of maternal health.  
5

6  
7 The most frequent error encountered was unintended medication omission following acute  
8 hospital admission (0.97 errors/prescription written, versus 0.53 for discharge medications).  
9 When adjusted in multivariable analyses (Table 6) there was no statistically significant  
10 difference in error rates between admission and discharge. We found no overall difference in  
11 error rate amongst different grades of prescriber, and newly qualified doctors were not more  
12 likely to make errors than their senior colleagues. Although numbers were relatively small,  
13 we observed no difference in error rate amongst newly qualified doctors by undergraduate  
14 training, and doctors trained in Liverpool were neither more nor less likely to commit  
15 medication errors. The categories and severity of errors made by different prescriber grades  
16 were broadly similar (Table 3, Figure 2), however some differences were observed. For  
17 example, writing errors were more frequently observed with newly qualified doctors,  
18 medication omission was more frequently observed with junior and mid grade doctors, and  
19 dosing errors were more frequently observed with mid grade doctors.  
20  
21

22  
23 These results are consistent with previously published studies. Both the EQUIP and  
24 PRACTiCe Studies<sup>3 6</sup> reported error rates of approximately 1 in 10 medications prescribed  
25 (we observed a rate of 10.9%). Given the high number of medications prescribed (mean of  
26 6.3 items/prescription) nearly half of all prescriptions contained at least one error.  
27

28 A systematic review found prescribing errors to be more common in adults than in children.<sup>1</sup>  
29 A study in Spain comparing paediatric wards with obstetrics found that paediatric patients  
30 had a fourfold higher risk of serious errors than the maternity population (2.3% vs 14.3%),  
31 which were mainly related to drug dosing.<sup>22</sup> ~~This is in keeping with our data, as w~~  
32 observed a low error rate for the paediatrics specialty hospital, although this was likely due  
33 to a low number of prescribed items. Dosing errors were the most common error type.  
34 Another study reported that prescribing errors were more common in primary care amongst  
35 men compared to women.<sup>6</sup> We observed a significantly lower risk for errors in specialist  
36 services for women.  
37

38  
39 In the EQUIP study, multivariate analysis showed that all grades of doctors were more likely  
40 to write a prescription containing an error than consultants.<sup>3</sup> A retrospective study which  
41 evaluated errors on discharge prescriptions found no significant difference in error rates  
42 between prescriber grades, although no senior (consultant) level prescribers were  
43 included.<sup>15</sup> In primary care, the grade of general practitioner was not associated with  
44 prescribing errors.<sup>6</sup> We observed no significant difference in prescribing error rates between  
45 prescriber grades, when compared to newly qualified prescribers. EQUIP also reported that  
46 medication orders issued at acute admission were 70% more likely to be associated with a  
47 prescribing error.<sup>3</sup> Another study found lower error rates on discharge prescription items  
48 than was observed with general inpatient prescribing, due to a lower rate of medication  
49 omission, however these factors were not corrected for the number of items on each  
50 prescription.<sup>2</sup> We observed a trend towards errors being more likely to occur on admission  
51 prescriptions than on discharge prescriptions, with an odds ratio (OR) of 1.16, although this  
52 did not reach significance in multivariate analysis.  
53  
54  
55

56  
57 In multivariate analysis, the strongest predictor for prescribing error was the number of  
58 medicines on each prescription, with risk for prescribing error increasing by 14% for every  
59 additional medication item prescribed. Complex polypharmacy is becoming increasingly  
60 common, with patients potentially requiring management for multiple chronic conditions

1  
2  
3 simultaneously. In these patients, vigilance for prescribing errors and pharmacist review is of  
4 particular importance.  
5

6  
7 Our study was limited by missing data (one acute hospital failed to return data on number of  
8 items on each prescription), and although pharmacists had received some basic training in  
9 completing the evaluations, *post-hoc* analyses suggested significant variability between  
10 pharmacists' classification of errors, and especially in assignment of severity classification.  
11 Two of us independently revised each prescribing error and noted a tendency to over-  
12 estimate the severity of errors, and (in keeping with EQUIP criteria) included in our  
13 evaluations an assessment of whether or not a wrong dose was likely to have been actually  
14 administered based on tablet burden. We also refined EQUIP criteria to assign severity  
15 ratings to error categories where these had previously not been provided. Finally, in order to  
16 limit the impact of error misclassification on study findings, the original 29 error categories  
17 were batched into 10 different types of error groups relating to key components of  
18 prescribing. Finally, by grouping errors into categories according to their origin, we sought to  
19 reduce misclassification as far as possible. Since our data collection forms did not allow us  
20 to evaluate errors which had been missed, it is possible that our observed error rates may  
21 represent an under-estimate of the true burden of prescribing error.  
22  
23

24  
25 Medication omission was the most prevalent error, representing 26.9% of all errors  
26 observed, which is consistent with previous reports.<sup>2 15</sup> Prescribing during acute admission  
27 in the absence of a full medication history may sometimes be unavoidable, and does not  
28 necessarily constitute an error. For this reason we discriminated between 'emergency'  
29 prescribing, and errors where a more complete or accurate medication history would have  
30 prevented omission of prescribed medications. Although we sought to capture only  
31 unintended medication omission, it is possible that there might still have been cases where  
32 the omission was intentional (for example, suspension of diuretics in a patient who was  
33 hypotensive or dehydrated on admission) but this intent had been missed by the pharmacist  
34 collecting the data. A sensitivity analysis showed that if all errors of medication omission  
35 either on discharge or admission were excluded, the number of errors totals 2249 (0.53 per  
36 prescription written); with 1471 (34.7%) prescriptions containing at least one error, which  
37 represents a significant reduction in overall prescribing error rate. A core role for clinical  
38 ward based pharmacists is medicines reconciliation for admitted patients. This involves  
39 detailed medication history taking, recording of full medication list in the patient's case notes,  
40 and discussion with the clinical team to ensure that all regular medicines are prescribed  
41 throughout the admission, if appropriate. Similarly, on discharge, pharmacists ensure that  
42 necessary regular medicines are continued, and that any medicines newly started during the  
43 admission are prescribed for discharge as appropriate. The majority of the omission errors  
44 reported will have been rectified during admission or prior to discharge, as a result of the  
45 pharmacist clinical check. This highlights the importance of medicines reconciliation as soon  
46 as practicable at hospital admission, in order to minimise the possibility of missed doses of  
47 essential medicines. The role of pharmacists in acute admission settings may therefore be of  
48 particular benefit.  
49  
50  
51  
52  
53

54  
55 EQUIP error categories which could potentially be eliminated by introduction of electronic  
56 prescribing (strength/dose missing, product/formulation not specified, no signature, start date  
57 incorrect/missing, incorrect route, IV instructions incorrect/missing) accounted for 357  
58 (11.9%) of the 3011 errors observed. A further 376 (12.5%) errors could be reduced by  
59 electronic prescribing, via alerts, cautions and required fields at the patient entry/prescribing  
60 stage, although many of these can be over-ridden by the prescriber.<sup>23</sup> These include:

For peer review only - <http://bmjopen.bmj.com/site/about/guidelines.xhtml>

1  
2  
3 administration times missing/incorrect, duplication, CD requirements incorrect/missing. The  
4 extent to which electronic prescribing can eliminate particular error types depends on the  
5 individual systems used. Importantly, whilst electronic prescribing systems could potentially  
6 have prevented up to a quarter of errors, these systems are best utilised alongside rather  
7 than instead of existing safeguards. We did not formally evaluate differences in error rates  
8 between electronic prescribing and paper-based prescribing systems. Although one hospital  
9 (Hospital G) was utilising complete electronic prescribing systems on some wards at the time  
10 of the study, and many of the other hospitals were using electronically generated discharge  
11 summaries, we failed to observe any clear association with error rate, mainly because of the  
12 large variability in case mix which impacted directly on the number of items/prescription. In  
13 contrast, EQUIP reported that electronic prescriptions were 12% less likely to be associated  
14 with a prescribing error than handwritten prescriptions.<sup>3</sup> Although electronic discharge  
15 summaries may reduce error due to legibility, they do not eliminate the transcription step  
16 from inpatient charts. One study which analysed 1808 handwritten and electronic discharge  
17 summaries found no difference in the number or types of errors observed.<sup>15</sup> It is also worth  
18 noting that electronic systems, while clearly offering an advantage over conventional  
19 medicines management and prescribing systems, have themselves been associated with  
20 new patterns of error. Studies in the UK and Australia found a significant reduction in  
21 prescribing errors detected after introduction of electronic prescribing systems, but also  
22 identified errors specific to the electronic prescribing system used, for example, incorrect  
23 product selected from drop-down menu, or incorrect dosing frequency selected.<sup>24-26</sup> These  
24 electronic systems will doubtless continue to improve through refinement.<sup>23 27</sup>

25  
26  
27  
28  
29  
30 The Erice Medication Errors Research Group (EMERGE) recommendations for reducing  
31 prescribing errors, includes training and assessment of prescribers, ongoing monitoring,  
32 awareness and communication.<sup>14</sup> Health systems which may impact on likelihood of error  
33 occurring include European harmonisation of prescribing, introduction of integrated  
34 prescription forms, use of IT systems such as electronic prescribing, and standardisation,  
35 evaluation, and certification of such systems. Involvement of clinical pharmacists at all points  
36 of the medication process is also recommended.<sup>14</sup> The latter is important since all the  
37 hospital Trusts in our survey had evolved systems to safeguard patients from prescribing  
38 error (regardless of the adoption of electronic prescribing), and this involved use of ward-  
39 based pharmacists and dispensary staff to perform routine checks on all prescriptions issued  
40 <sup>3 10 22 28</sup>. This likely represents the 'last line of defence' against prescribing error, and has  
41 greatest utility when deployed in clinical areas associated with highest risk, for example  
42 patients with complex polypharmacy, and hospital admission settings. One fundamental role  
43 of clinical pharmacists during acute admission is medicines reconciliation, where a patient's  
44 full medication history is determined and recorded using all available sources of information.  
45 We found that prescribing errors in secondary care are prevalent, regardless of prescriber  
46 grade. Our findings therefore suggest that removing this safeguard (e.g. through service  
47 reconfiguration or in an effort to reduce costs) could potentially lead to higher numbers of  
48 medication errors actually reaching the patient.  
49  
50  
51  
52  
53  
54  
55  
56  
57  
58  
59  
60

### **Acknowledgements**

We gratefully acknowledge the contributions of pharmacists who participated in this study. This work was funded through an unrestricted educational grant from Mersey Deanery, although design, execution, analysis and reporting was carried out independently by the study team.

We thank Professor David Graham, Postgraduate Medical Dean, Mersey Deanery, for supporting the project

We thank the National Institute of Health Research (NIHR Department of Health) and the Northwest Development Agency (NWDA) for infrastructural and project support.

### **Declaration**

All authors have completed the Unified Competing Interest form and declare that (1) SK has received research funding for website development from Merck, Bristol Myers Squibb, Gilead, ViiV, Tibotec, and Abbott, and honoraria, travel support for conference attendance from Roche, Tibotec, and Viiv in the past 3 years. All other authors have nothing to declare

TK and SHK developed the study concept, ML, SJ, AMc, AR, JS, AG, CC, BT co-ordinated data collection, KS, SHK analysed the data, JJK undertook the main statistical analysis with tabulations produced by KS. KS, SHK prepared the manuscript. JJK was involved in substantial revisions of the manuscript. TK, ML, SJ, AMc, AR, JS, AG, CC, BT reviewed the manuscript, SHK is the guarantor for the project.

All authors, external and internal, had full access to all of the data (including statistical reports and tables) in the study and can take responsibility for the integrity of the data and the accuracy of the data analysis

Data sharing: all requests for data sharing to Professor SH Khoo (khoo@liv.ac.uk)

The Corresponding Author has the right to grant on behalf of all authors and does grant on behalf of all authors, an exclusive licence (or non exclusive for government employees) on a worldwide basis to the BMJ Publishing Group Ltd to permit this article (if accepted) to be published in BMJ editions and any other BMJ PGL products and sublicences such use and exploit all subsidiary rights, as set out in our licence

## References

1. Lewis PJ, Dornan T, Taylor D, Tully MP, Wass V, Ashcroft DM. Prevalence, incidence and nature of prescribing errors in hospital inpatients: a systematic review. *Drug Saf* 2009;32(5):379-89.
2. Franklin BD, Reynolds M, Shebl NA, Burnett S, Jacklin A. Prescribing errors in hospital inpatients: a three-centre study of their prevalence, types and causes. *Postgrad Med J* 2011;87(1033):739-45.
3. EQUIP final report. [http://www.gmc-uk.org/FINAL\\_Report\\_prevalence\\_and\\_causes\\_of\\_prescribing\\_errors.pdf](http://www.gmc-uk.org/FINAL_Report_prevalence_and_causes_of_prescribing_errors.pdf) 28935150.pdf
4. Gleason KM, McDaniel MR, Feinglass J, Baker DW, Lindquist L, Liss D, et al. Results of the Medications at Transitions and Clinical Handoffs (MATCH) study: an analysis of medication reconciliation errors and risk factors at hospital admission. *J Gen Intern Med* 2010;25(5):441-7.
5. Abramson EL, Bates DW, Jenter C, Volk LA, Barron Y, Quaresimo J, et al. Ambulatory prescribing errors among community-based providers in two states. *J Am Med Inform Assoc* 2011.
6. The PRACTiCe Study (PRevalence And Causes of prescribing errors in general practiCe) A report for the GMC May 2012 [http://www.gmc-uk.org/Investigating\\_the\\_prevalence\\_and\\_causes\\_of\\_prescribing\\_errors\\_in\\_general\\_practice\\_The\\_PRACTiCe\\_study\\_Report\\_May\\_2012\\_48605085.pdf](http://www.gmc-uk.org/Investigating_the_prevalence_and_causes_of_prescribing_errors_in_general_practice_The_PRACTiCe_study_Report_May_2012_48605085.pdf)
7. Davies EC, Green CF, Taylor S, Williamson PR, Mottram DR, Pirmohamed M. Adverse drug reactions in hospital in-patients: a prospective analysis of 3695 patient-episodes. *PLoS One* 2009;4(2):e4439.
8. Drenth-van Maanen AC, Spee J, van Hensbergen L, Jansen PA, Egberts TC, van Marum RJ. Structured history taking of medication use reveals iatrogenic harm due to discrepancies in medication histories in hospital and pharmacy records. *J Am Geriatr Soc* 2011;59(10):1976-7.
9. Reason J. Human error: models and management. *BMJ* 2000;320(7237):768-70.
10. Dean B, Schachter M, Vincent C, Barber N. Causes of prescribing errors in hospital inpatients: a prospective study. *Lancet* 2002;359(9315):1373-8.
11. Barber N, Rawlins M, Dean Franklin B. Reducing prescribing error: competence, control, and culture. *Qual Saf Health Care* 2003;12 Suppl 1:i29-32.
12. Inside your Hospital: Dr. Foster Hospital Guide 2001-2011. Dr Foster Intelligence/Department of Health L, UK. Available from URL: [http://drfosterintelligence.co.uk/wp-content/uploads/2011/11/Hospital\\_Guide\\_2011.pdf](http://drfosterintelligence.co.uk/wp-content/uploads/2011/11/Hospital_Guide_2011.pdf), date last accessed 13/3/12.
13. Hospital Patients 'More Likely to Die at Weekends' BBC News, London. Available from URL: <http://www.bbc.co.uk/news/health-15895663>, date last accessed 13/3/12.
14. Agrawal A, Aronson JK, Britten N, Ferner RE, de Smet PA, Fialova D, et al. Medication errors: problems and recommendations from a consensus meeting. *Br J Clin Pharmacol* 2009;67(6):592-8.
15. Callen J, McIntosh J, Li J. Accuracy of medication documentation in hospital discharge summaries: A retrospective analysis of medication transcription errors in manual and electronic discharge summaries. *Int J Med Inform* 2010;79(1):58-64.
16. Likic R, Maxwell SR. Prevention of medication errors: teaching and training. *Br J Clin Pharmacol* 2009;67(6):656-61.
17. Harding S, Britten N, Bristow D. The performance of junior doctors in applying clinical pharmacology knowledge and prescribing skills to standardized clinical cases. *Br J Clin Pharmacol* 2010;69(6):598-606.
18. Goldacre MJ, Taylor K, Lambert TW. Views of junior doctors about whether their medical school prepared them well for work: questionnaire surveys. *BMC Med Educ* 2010;10:78.
19. Tomorrow's Doctors, General medical Council, London, UK. February 2003. Available from URL: [http://www.gmc-uk.org/static/documents/content/TomorrowsDoctors\\_2003.pdf](http://www.gmc-uk.org/static/documents/content/TomorrowsDoctors_2003.pdf).
20. Tomorrow's Doctors. General Medical Council, London UK. September 2009. Available from URL: [http://www.gmc-uk.org/static/documents/content/TomorrowsDoctors\\_2009.pdf](http://www.gmc-uk.org/static/documents/content/TomorrowsDoctors_2009.pdf)



- 1
- 2
- 3 21. Dean B, Barber N, Schachter M. What is a prescribing error? *Qual Health Care* 2000;9(4):232-7.
- 4 22. Fernandez-Llamazares CM, Calleja-Hernandez MA, Manrique-Rodriguez S, Perez-Sanz C, Duran-
- 5 Garcia E, Sanjurjo-Saez M. Prescribing errors intercepted by clinical pharmacists in
- 6 paediatrics and obstetrics in a tertiary hospital in Spain. *Eur J Clin Pharmacol* 2012.
- 7 23. Scott GP, Shah P, Wyatt JC, Makubate B, Cross FW. Making electronic prescribing alerts more
- 8 effective: scenario-based experimental study in junior doctors. *J Am Med Inform Assoc*
- 9 2011;18(6):789-98.
- 10 24. Donyai P, O'Grady K, Jacklin A, Barber N, Franklin BD. The effects of electronic prescribing on the
- 11 quality of prescribing. *Br J Clin Pharmacol* 2008;65(2):230-7.
- 12 25. Westbrook JI, Reckmann M, Li L, Runciman WB, Burke R, Lo C, et al. Effects of two commercial
- 13 electronic prescribing systems on prescribing error rates in hospital in-patients: a before and
- 14 after study. *PLoS Med* 2012;9(1):e1001164.
- 15 26. Jani YH, Barber N, Wong IC. Republished error management: Paediatric dosing errors before and
- 16 after electronic prescribing. *Postgrad Med J* 2011;87(1030):565-8.
- 17 27. Nanji KC, Rothschild JM, Salzberg C, Keohane CA, Zigmont K, Devita J, et al. Errors associated with
- 18 outpatient computerized prescribing systems. *J Am Med Inform Assoc* 2011;18(6):767-73.
- 19 28. Klopotoska JE, Kuiper R, van Kan HJ, de Pont AC, Dijkgraaf MG, Lie AHL, et al. On-ward
- 20 participation of a hospital pharmacist in a Dutch intensive care unit reduces prescribing
- 21 errors and related patient harm: an intervention study. *Crit Care* 2010;14(5):R174.
- 22
- 23
- 24
- 25
- 26
- 27
- 28
- 29
- 30
- 31
- 32
- 33
- 34
- 35
- 36
- 37
- 38
- 39
- 40
- 41
- 42
- 43
- 44
- 45
- 46
- 47
- 48
- 49
- 50
- 51
- 52
- 53
- 54
- 55
- 56
- 57
- 58
- 59
- 60



**Figure 1.** Forest plot showing prescribing error rates in nine hospitals across North West England.

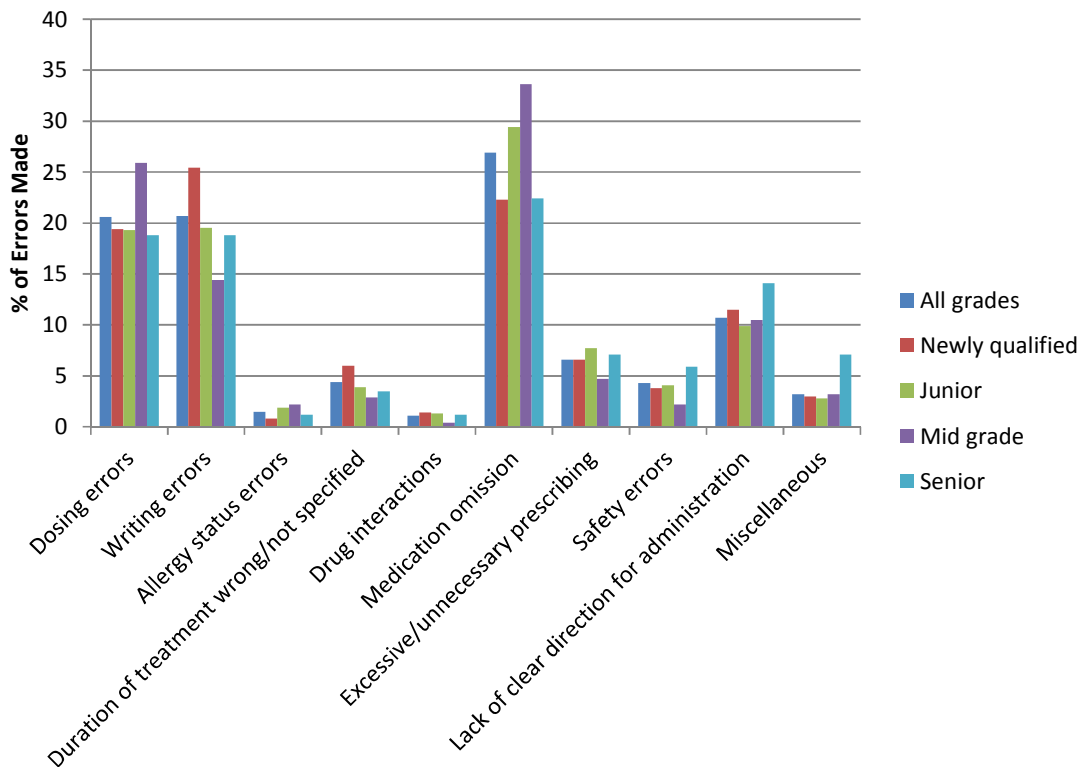

**Figure 2.** Categories of prescribing errors made by different grades of prescriber

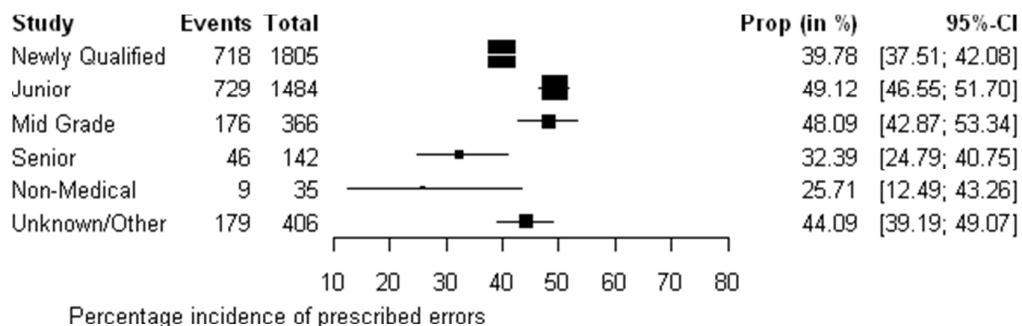

**Figure 3.** Forest plot showing prescribing error rates made by different prescriber grades

peer review only

1  
2  
3  
4  
5  
6  
7  
8  
9  
10  
11  
12  
13  
14  
15  
16  
17  
18  
19  
20  
21  
22  
23  
24  
25  
26  
27  
28  
29  
30  
31  
32  
33  
34  
35  
36  
37  
38  
39  
40  
41  
42  
43  
44  
45  
46  
47  
48  
49  
50  
51  
52  
53  
54  
55  
56  
57  
58  
59  
60

Table 1. Types of hospitals contributing prescription data

| Teaching Hospitals | District Hospitals | Specialist Hospitals<br>(Women, Paediatrics,<br>Mental Health) |
|--------------------|--------------------|----------------------------------------------------------------|
| Hospital A         | Hospital B         | Hospital D                                                     |
| Hospital C         | Hospital E         | Hospital G                                                     |
| Hospital H         | Hospital F         | Hospital I                                                     |

For peer review only

1 **Table 2.** Application of error categories and severity ratings for the Mersey Deanery Prescribing Audit  
 2  
 3  
 4  
 5  
 6  
 7  
 8  
 9  
 10  
 11  
 12  
 13  
 14  
 15  
 16  
 17  
 18  
 19  
 20  
 21  
 22  
 23  
 24  
 25  
 26  
 27  
 28  
 29  
 30  
 31  
 32  
 33  
 34  
 35  
 36  
 37  
 38  
 39  
 40  
 41  
 42  
 43  
 44  
 45  
 46  
 47  
 48  
 49

| Modified EQUIP Error Category                 | Original EQUIP Error Category     | Includes/Excludes                                                                                                | Severity (EQUIP)                                                                                                                                                                                                                                                                                                                                                       | Severity Modification                                                                                                                                                                                                |
|-----------------------------------------------|-----------------------------------|------------------------------------------------------------------------------------------------------------------|------------------------------------------------------------------------------------------------------------------------------------------------------------------------------------------------------------------------------------------------------------------------------------------------------------------------------------------------------------------------|----------------------------------------------------------------------------------------------------------------------------------------------------------------------------------------------------------------------|
| 1. Dosing Errors                              | Underdose                         |                                                                                                                  | <b>Minor</b> if unable/unlikely to carry out (units); <b>Significant</b> if dose too low to treat the condition; <b>Serious</b> if patient in acute distress; <b>Potentially Lethal</b> if medication life saving                                                                                                                                                      |                                                                                                                                                                                                                      |
|                                               | Overdose                          | Excludes overdoses caused by duplication eg. Paracetamol with co-codamol                                         | <b>Minor</b> if unable/unlikely to carry out (units); <b>Significant</b> - low TI, ½-4 times; <b>Serious</b> - Low TI, 4-10 times; errors in units if chance dose could be given; <b>Potentially Lethal</b> if v.low TI and dose 10 times normal dose, results in serum levels of drug in severe toxicity range, or has high potential to cause cardiopulmonary arrest | <b>Minor</b> if effect of dosing expected to be minimal                                                                                                                                                              |
|                                               | Dose/rate mismatch                |                                                                                                                  | -                                                                                                                                                                                                                                                                                                                                                                      | Judgement used based on Equip severity categories                                                                                                                                                                    |
| 2. Writing Errors                             | Strength/dose missing             | Includes dose units missing                                                                                      | <b>Minor</b>                                                                                                                                                                                                                                                                                                                                                           |                                                                                                                                                                                                                      |
|                                               | Product/formulation not specified |                                                                                                                  | -                                                                                                                                                                                                                                                                                                                                                                      | <b>Minor</b>                                                                                                                                                                                                         |
|                                               | Incorrect formulation             |                                                                                                                  | -                                                                                                                                                                                                                                                                                                                                                                      | <b>Minor</b> unless formulation likely to have implication on treatment eg. Insulin, co-careldopa, in which case <b>significant/serious</b> based on potential consequence                                           |
|                                               | No signature                      |                                                                                                                  | -                                                                                                                                                                                                                                                                                                                                                                      | <b>Significant</b> (governance issue)                                                                                                                                                                                |
|                                               | Start date incorrect/missing      |                                                                                                                  | -                                                                                                                                                                                                                                                                                                                                                                      | <b>Minor</b>                                                                                                                                                                                                         |
|                                               | CD requirements incorrect/missing |                                                                                                                  | -                                                                                                                                                                                                                                                                                                                                                                      | <b>Minor</b>                                                                                                                                                                                                         |
| 3. Allergy status missing/significant allergy | Significant allergy               | Includes allergy status not completed, or where a drug has been prescribed despite an allergy to that drug/class | -                                                                                                                                                                                                                                                                                                                                                                      | <b>Significant</b> allergy status/specific allergy missed off prescription; <b>Serious</b> if patient prescribed agent allergic to; <b>Potentially Lethal</b> if patient prescribed drug which previously had severe |

|                                                     |                                         |                                                                                                                                                |                                                                                                |                                                                                                                                                                                                                                                                                                                                   |
|-----------------------------------------------------|-----------------------------------------|------------------------------------------------------------------------------------------------------------------------------------------------|------------------------------------------------------------------------------------------------|-----------------------------------------------------------------------------------------------------------------------------------------------------------------------------------------------------------------------------------------------------------------------------------------------------------------------------------|
|                                                     |                                         |                                                                                                                                                |                                                                                                | reaction to eg. oedema                                                                                                                                                                                                                                                                                                            |
| <b>4. Duration of treatment wrong/not specified</b> | Continuation for longer than needed     | Includes no stop/review date for antibiotics, steroids etc                                                                                     | -                                                                                              | <b>Minor</b> if continuation of the medicine or the duration represents little potential for harm; <b>Significant</b> if continued >3 days longer than needed for medication such as: antibiotics, oral steroids, LMWH, potassium; <b>Serious</b> if ongoing treatment could cause serious harm                                   |
|                                                     | Premature discontinuation               | Includes drugs stopped without appropriate reducing course                                                                                     | -                                                                                              | <b>Minor</b> if discontinuation is unlikely to have a significant clinical impact; <b>Significant</b> if duration of treatment insufficient to treat condition eg. Antibiotics, or if no reducing course eg. Oral steroids                                                                                                        |
| <b>5. Drug Interactions</b>                         | Drug interaction                        | Excludes 2 items prescribed from same class e.g omeprazole with lansporazole (Duplication)                                                     | <b>Serious</b> if drug orders could exacerbate a patient's condition eg. Drug-drug interaction | <b>Significant</b> if manufacturer advises the combination is contraindicated, should be avoided, or advises caution; <b>Serious</b> if adverse events highly probable                                                                                                                                                            |
|                                                     | Drug interaction not taken into account | As above: unable to differentiate drug interaction and drug interaction not taken into account from available data                             |                                                                                                |                                                                                                                                                                                                                                                                                                                                   |
| <b>6. Omission of medication</b>                    | Omission on admission                   |                                                                                                                                                | <b>Significant</b> (regular medication)                                                        | -                                                                                                                                                                                                                                                                                                                                 |
|                                                     | Omission on discharge                   |                                                                                                                                                | <b>Significant</b>                                                                             | -                                                                                                                                                                                                                                                                                                                                 |
|                                                     | Drug not prescribed but indicated       |                                                                                                                                                | -                                                                                              | <b>Minor</b> if medication is unlikely to significantly impact patient care; <b>Significant</b> if medication would have significant impact on clinical course <b>Serious</b> if medication would alleviate a serious condition /patient is in acute distress; <b>Potentially lethal</b> if medication is potentially life saving |
| <b>7. Excessive/unnecessary</b>                     | Duplication                             | Includes a second agent prescribed which contains an ingredient already being taken; 2 drugs prescribed from the same class/with same clinical | <b>Minor</b> if duplicate therapy prescribed without potential for increased adverse events    | <b>Significant, Serious, Potentiallylethal:</b> As for overdose when duplicated items co-administered (3)                                                                                                                                                                                                                         |

1  
2  
3  
4  
5  
6  
7  
8  
9  
10  
11  
12  
13  
14  
15  
16  
17  
18  
19  
20  
21  
22  
23  
24  
25  
26  
27  
28  
29  
30  
31  
32  
33  
34  
35  
36  
37  
38  
39  
40  
41  
42  
43  
44  
45  
46  
47  
48  
49

|                                                |                                                |                                                                                                                                                  |                                                                                                                                                                     |                                                                                                                                                                           |
|------------------------------------------------|------------------------------------------------|--------------------------------------------------------------------------------------------------------------------------------------------------|---------------------------------------------------------------------------------------------------------------------------------------------------------------------|---------------------------------------------------------------------------------------------------------------------------------------------------------------------------|
| prescribing                                    |                                                | effect eg. Lansoprazole + omeprazole                                                                                                             |                                                                                                                                                                     |                                                                                                                                                                           |
|                                                | Unintentional prescription of drug             | Drug prescribed was not that desired. Includes prescription of a discontinued drug, excluding discontinuation due to ADR , or course is too long | -                                                                                                                                                                   | Judgement used based on Equip severity categories                                                                                                                         |
| 8. Clinical Safety Errors                      | No maximum dose                                | Excludes prescriptions with no frequency (administration times missing/incorrect)                                                                | Minor- order lacked specific drug, dose, strength, frequency or route information                                                                                   | Significant if no maximum dose stated for opioids                                                                                                                         |
|                                                | Clinical contraindication                      | Contraindication according to summary of product characteristics                                                                                 | Serious if drug orders could exacerbate a patient's condition eg. Drug-disease interaction                                                                          | Significant if administration unlikely to have serious clinical consequences in the given situation                                                                       |
|                                                | Continuation after ADR                         |                                                                                                                                                  | -                                                                                                                                                                   | Judgement used based on Equip severity categories                                                                                                                         |
|                                                | No dosage alteration after levels out of range |                                                                                                                                                  | -                                                                                                                                                                   | Judgement used based on Equip severity categories                                                                                                                         |
| 9. Lack of clear directions for administration | Administration times incorrect/missing         | No frequency/times of dosing incorrect eg. In relation to food, morning vs night.                                                                | Minor                                                                                                                                                               | Significant if administration time would be expected to affect treatment eg. Exenatide with meals, hypnotics at night                                                     |
|                                                | Incorrect route                                |                                                                                                                                                  | Minor if unlikely to be carried out/little chance of toxicity/therapeutic failure; Significant if wrong route to treat condition; Serious if potential for toxicity | -                                                                                                                                                                         |
|                                                | IV instructions incorrect/missing              |                                                                                                                                                  | -                                                                                                                                                                   | Judgement used based on Equip severity categories                                                                                                                         |
|                                                | Route missing                                  |                                                                                                                                                  | Minor- order lacked specific drug, dose, strength, frequency or route information                                                                                   | -                                                                                                                                                                         |
|                                                | Daily dose divided incorrectly                 | Number of dosing intervals incorrect. Excludes under/overdose                                                                                    | -                                                                                                                                                                   | Minor if dosing intervals are not standard, but are unlikely to significantly affect treatment; Significant if dosing intervals are inappropriate to treat the condition; |

1  
2  
3  
4  
5  
6  
7  
8  
9  
10  
11  
12  
13  
14  
15  
16  
17  
18  
19  
20  
21  
22  
23  
24  
25  
26  
27  
28  
29  
30  
31  
32  
33  
34  
35  
36  
37  
38  
39  
40  
41  
42  
43  
44  
45  
46  
47  
48  
49

|                          |               |                                                                                                                                                                       |   |                                                                                                                                                                            |
|--------------------------|---------------|-----------------------------------------------------------------------------------------------------------------------------------------------------------------------|---|----------------------------------------------------------------------------------------------------------------------------------------------------------------------------|
|                          |               |                                                                                                                                                                       |   | <b>Serious</b> if medication has narrow TI and dosing intervals may affect toxicity/efficacy eg. Parenteral aminoglycosides                                                |
| <b>10. Miscellaneous</b> | No indication | Includes PRN medications, where lack of indication on prescription could prevent administration. Excludes failure to write an indication when prescribing antibiotics | - | <b>Minor</b> if indication not written up for PRN medication; <b>Significant</b> if indication not written up for formulations which are licensed for specific conditions. |
|                          | Miscellaneous | Illegible drug details, non-standard abbreviations, patient details incorrect/missing, warfarin fixed dose prescribed.                                                | - | Judgement used based on Equip severity categories                                                                                                                          |

Abbreviations: TI- therapeutic index, CD- controlled drug, ADR- adverse drug reaction, PRN- when required



**Table 3.** Summary data showing prevalence and severity of errors observed

|                             |                 | Total Prescriptions | One or more error reported |                        | Error Severity         |                        |                      |                        | Total errors |
|-----------------------------|-----------------|---------------------|----------------------------|------------------------|------------------------|------------------------|----------------------|------------------------|--------------|
|                             |                 |                     | No (%)                     | Yes (%)                | Minor (%)              | Significant (%)        | Serious (%)          | Potentially Lethal (%) |              |
| <b>All</b>                  |                 | <b>4238</b>         | <b>2381<br/>(56.2)</b>     | <b>1857<br/>(43.8)</b> | <b>1264<br/>(42.0)</b> | <b>1629<br/>(54.1)</b> | <b>109<br/>(3.6)</b> | <b>9<br/>(0.3)</b>     | <b>3011</b>  |
| <b>Prescriber Grade</b>     | Newly Qualified | 1805                | 1087<br>(60.2)             | 718<br>(39.8)          | 519<br>(48.8)          | 507<br>(47.7)          | 35<br>(3.3)          | 3<br>(0.3)             | 1064         |
|                             | Junior          | 1484                | 755<br>(50.9)              | 729<br>(49.1)          | 496<br>(39.2)          | 725<br>(57.4)          | 41<br>(3.2)          | 2<br>(0.2)             | 1264         |
|                             | Mid Grade       | 366                 | 190<br>(51.9)              | 176<br>(48.1)          | 93<br>(33.6)           | 166<br>(59.9)          | 15<br>(5.4)          | 3<br>(1.1)             | 277          |
|                             | Senior          | 142                 | 96<br>(67.6)               | 46<br>(32.4)           | 36<br>(42.4)           | 43<br>(50.6)           | 6<br>(7.1)           | 0<br>(0)               | 85           |
|                             | Non-medical     | 35                  | 26<br>(74.3)               | 9<br>(25.7)            | 8<br>(57.1)            | 5<br>(35.7)            | 1<br>(7.1)           | 0<br>(0)               | 14           |
|                             | unknown/other   | 406                 | 227<br>(55.9)              | 179<br>(44.1)          | 112<br>(36.5)          | 183<br>(59.6)          | 11<br>(3.6)          | 1<br>(0.3)             | 307          |
| <b>Training</b>             | Liverpool       | 1290                | 787<br>(61.0)              | 503<br>(39.0)          | 270<br>(35.4)          | 456<br>(59.8)          | 36<br>(4.7)          | 1<br>(0.1)             | 763          |
|                             | Non-Liverpool   | 922                 | 478<br>(51.8)              | 444<br>(48.2)          | 342<br>(43.8)          | 420<br>(53.8)          | 19<br>(2.4)          | 0<br>(0)               | 781          |
|                             | Unknown         | 2026                | 1118<br>(55.2)             | 908<br>(44.8)          | 652<br>(44.4)          | 753<br>(51.3)          | 54<br>(3.7)          | 8<br>(0.5)             | 1467         |
| <b>Admission/ Discharge</b> | Discharge       | 2467                | 1615<br>(65.5)             | 852<br>(34.5)          | 685<br>(52.5)          | 584<br>(44.8)          | 32<br>(2.5)          | 4<br>(0.3)             | 1305         |
|                             | Admission       | 1744                | 756<br>(43.4)              | 988<br>(56.7)          | 576<br>(34.2)          | 1030<br>(61.1)         | 75<br>(4.4)          | 5<br>(0.3)             | 1686         |
|                             | Unknown         | 27                  | 12<br>(44.44)              | 15<br>(55.55)          | 3<br>(15)              | 15<br>(75)             | 2<br>(10)            | 0<br>(0)               | 20           |
| <b>Ward Area</b>            | Medicine        | 2059                | 1083<br>(52.6)             | 976<br>(47.4)          | 634<br>(39.0)          | 921<br>(56.7)          | 64<br>(3.9)          | 6<br>(0.37)            | 1625         |

|                               |                      |      |               |                                               |               |               |             |            |     |
|-------------------------------|----------------------|------|---------------|-----------------------------------------------|---------------|---------------|-------------|------------|-----|
|                               | Surgery              | 1395 | 836<br>(59.9) | 559<br>(40.1)                                 | 448<br>(50.1) | 417<br>(46.6) | 27<br>(3.0) | 2<br>(0.2) | 894 |
|                               | Mental health        | 96   | 66<br>(68.8)  | 30<br>(31.3)                                  | 24<br>(60)    | 16<br>(40)    | 0<br>(0)    | 0<br>(0)   | 40  |
|                               | Accident & Emergency | 8    | 1<br>(12.5)   | 7<br>(87.5)                                   | 1<br>(9.1)    | 10<br>(90.9)  | 0<br>(0)    | 0<br>(0)   | 11  |
|                               | Critical care        | 17   | 14<br>(82.4)  | 3<br>(17.7)                                   | 1<br>(25.0)   | 3<br>(75.0)   | 0<br>(0)    | 0<br>(0)   | 4   |
|                               | Unknown              | 663  | 383<br>(57.8) | 280<br>(42.2)                                 | 156<br>(35.7) | 262<br>(60.0) | 18<br>(4.1) | 1<br>(0.2) | 437 |
| <b>Prescription contains#</b> | Antibiotic           | 724  | 301<br>(41.6) | 423 (58.4)<br><b>(Antibiotic: 130 (18.0))</b> | 57<br>(29.8)  | 118<br>(61.8) | 16<br>(8.4) | 0<br>(0)   | 191 |
|                               | Insulin              | 129  | 42<br>(32.6)  | 87 (67.4)<br><b>Insulin: 20 (15.5)</b>        | 12<br>(37.5)  | 19<br>(59.4)  | 1<br>(3.1)  | 0<br>(0)   | 32  |
|                               | Warfarin             | 196  | 71<br>(36.2)  | 125 (63.8)<br><b>Warfarin: 18 (9.2)</b>       | 6<br>(23.1)   | 16<br>(61.5)  | 4<br>(15.4) | 0<br>(0)   | 26  |
|                               | Oxygen               | 36   | 7<br>(19.4)   | 29 (80.6)<br><b>Oxygen: 2 (5.6)</b>           | 1<br>(14.3)   | 5<br>(71.4)   | 1<br>(14.3) | 0<br>(0)   | 7   |

\* Relates to errors per prescriptions written, not errors per number of items prescribed

# Error severities, total errors and error rates relate to errors associated with Antibiotics/Insulin/Warfarin/Oxygen only

**Table 4.** Summary of the Errors Observed which were Considered to be Potentially Lethal

| Error Description                                                                                                | Category                                       | Prescriber Grade | Ward Area | Admission/ Discharge |
|------------------------------------------------------------------------------------------------------------------|------------------------------------------------|------------------|-----------|----------------------|
| Gliclazide 400mg prescribed when 40mg needed                                                                     | 1- Dosing Errors                               | Newly qualified  | Medicine  | Discharge            |
| Digoxin 625micrograms prescribed when 62.5micrograms needed                                                      | 1- Dosing Errors                               | Newly qualified  | Medicine  | Discharge            |
| Oxycodone 500mg prescribed: overdose                                                                             | 1- Dosing Errors                               | Mid Grade        | Surgery   | Admission            |
| Methotrexate prescribed daily, not weekly                                                                        | 1- Dosing Errors                               | Junior           | Medicine  | Admission            |
| Doxazocin prescribed; had been stopped by general practitioner due to angioedema                                 | 3. Allergy status missing/ significant allergy | Junior           | Medicine  | Admission            |
| Phenytoin dose of 300mg daily incorrectly prescribed as 800mg                                                    | 1- Dosing Errors                               | Newly Qualified  | Medicine  | Discharge            |
| Midazolam IV for sedation: overdose                                                                              | 1- Dosing Errors                               | Mid Grade        | Unknown   | Admission            |
| Amiodarone loading dose of 200mg three times daily continued as a regular dose                                   | 1- Dosing Errors                               | Other            | Surgery   | Discharge            |
| Enoxaparin prescribed 1mg/kg once daily instead of 1mg/kg twice daily for a patient with acute coronary syndrome | 1- Dosing Errors                               | Mid Grade        | Medicine  | Admission            |

**Table 5.** Univariate statistics showing the significance of explanatory variables in predicting error rates in prescriptions.

| Variable                                                     | n    | ≥1 Error<br>n (%)     | No Error<br>n (%)    | Difference (95%CI)       | p-value |
|--------------------------------------------------------------|------|-----------------------|----------------------|--------------------------|---------|
| Prescriber Grade (n=3850)                                    |      | 1689                  | 2161                 |                          |         |
| <i>Newly qualified</i>                                       | 1803 | 716 (42%)             | 1087 (50%)           | -8% (-11.2% to -4.8%)    | <0.001  |
| <i>Junior</i>                                                | 1482 | 727 (43%)             | 755 (35%)            | 8% (4.9% to 11.1%)       |         |
| <i>Mid-grade</i>                                             | 366  | 176 (10%)             | 190 (8.8%)           | 1.2% (-0.7% to 3.1%)     |         |
| <i>Senior</i>                                                | 142  | 46 (2.7%)             | 96 (4.4%)            | -1.7% (-2.8% to -0.4%)   |         |
| <i>Non-medical</i>                                           | 35   | 9 (0.5%)              | 26 (1.2%)            | -0.7% (-1.3% to -0.1%)   |         |
| <i>Other</i>                                                 | 22   | 15 (0.9%)             | 7 (0.3%)             | 0.56% (0.1% to 1.1%)     |         |
| Discharge/Admission (n=3065)                                 |      | 1135                  | 1930                 |                          |         |
| Discharge                                                    | 2467 | 853 (75%)             | 1614 (84%)           | -9% (-12.0% to -6.0%)    | <0.001  |
| Admission                                                    | 598  | 282 (25%)             | 316 (16%)            |                          |         |
| Liverpool trained (n=1325)                                   |      | 518                   | 807                  |                          |         |
| <i>Liverpool</i>                                             | 35   | 14 (2.7%)             | 21 (2.6%)            | 0.1% (-1.7% to 1.9%)     | 0.911   |
| <i>Non-Liverpool</i>                                         | 1290 | 504 (97%)             | 786 (97%)            |                          |         |
| Hospital (n=4238)                                            |      | 1857                  | 2381                 |                          |         |
| <i>Hospital A</i>                                            | 762  | 366 (20%)             | 396 (17%)            | 3% (0.6% to 5.4%)        | <0.001  |
| <i>Hospital B</i>                                            | 513  | 239 (12%)             | 274 (12%)            | 0% (-2.0% to 2.0%)       |         |
| <i>Hospital C</i>                                            | 500  | 296 (16%)             | 204 (8.6%)           | 7.4% (5.4% to 9.4%)      |         |
| <i>Hospital D</i>                                            | 97   | 30 (1.6%)             | 67 (2.8%)            | -1.2% (-2.1% to -0.3%)   |         |
| <i>Hospital E</i>                                            | 371  | 160 (8.6%)            | 211 (8.9%)           | -0.3% (-2.0% to 1.4%)    |         |
| <i>Hospital F</i>                                            | 604  | 355 (19%)             | 249 (10%)            | 9% (6.8% to 11.2%)       |         |
| <i>Hospital G</i>                                            | 86   | 22 (1.2%)             | 64 (2.7%)            | -1.5% (-2.3% to -0.7%)   |         |
| <i>Hospital H</i>                                            | 807  | 290 (16%)             | 517 (22%)            | -6% (-8.4% to -3.6%)     |         |
| <i>Hospital I</i>                                            | 498  | 99 (5.3%)             | 399 (17%)            | -11.7% (-13.5% to -9.9%) |         |
| Ward Area (n=3575)                                           |      | 1577                  | 1998                 |                          |         |
| <i>Medical</i>                                               | 2059 | 977 (62%)             | 1082 (54%)           | 8% (4.8% to 11.2%)       | <0.001  |
| <i>Surgical</i>                                              | 1395 | 560 (36%)             | 835 (42%)            | -6% (-9.2% to -2.8%)     |         |
| <i>Accident &amp; Emergency</i>                              | 8    | 7 (0.4%)              | 1 (0.1%)             | 0.3% (-0.04% to 0.6%)    |         |
| <i>Mental health</i>                                         | 96   | 30 (1.9%)             | 66 (3.3%)            | -1.4% (-2.4% to -0.4%)   |         |
| <i>Critical care</i>                                         | 17   | 3 (0.2%)              | 14 (0.7%)            | -0.5% (-0.9% to -0.1%)   |         |
| Number of Medicines on Prescription (n=3386)<br>Median (IQR) |      | 8; (4,11)<br>(n=1435) | 4; (2,7)<br>(n=1951) | -4 (-4.5, -3.5)          | <0.001  |

n= number of prescriptions

**Table 6.** Multivariate logistic regression analysis for predicting error rates in prescriptions.

| Variable                          | Odds ratio (95%CI)  | p-value |
|-----------------------------------|---------------------|---------|
| <b>Hospital</b>                   |                     |         |
| <i>Hospital H</i>                 | 1                   |         |
| <i>Hospital A</i>                 | Not estimable*      |         |
| <i>Hospital B</i>                 | 1.11 (0.78 to 1.58) | 0.57    |
| <i>Hospital C</i>                 | 2.38 (1.63 to 3.46) | <0.001  |
| <i>Hospital D</i>                 | 0.64 (0.13 to 3.06) | 0.57    |
| <i>Hospital E</i>                 | 1.39 (0.96 to 2.01) | 0.08    |
| <i>Hospital F</i>                 | 3.53 (2.63 to 4.73) | <0.001  |
| <i>Hospital G</i>                 | 1.80 (1.03 to 3.12) | 0.04    |
| <i>Hospital I</i>                 | 1.11 (0.73 to 1.70) | 0.62    |
| <b>Prescriber Grade</b>           |                     |         |
| <i>Newly qualified</i>            | 1                   |         |
| <i>Junior</i>                     | 1.06 (0.85 to 1.32) | 0.61    |
| <i>Mid-grade</i>                  | 0.96 (0.64 to 1.44) | 0.83    |
| <i>Senior</i>                     | 0.97 (0.58 to 1.63) | 0.92    |
| <i>Non-medical</i>                | 0.59 (0.21 to 1.64) | 0.31    |
| <i>Other</i>                      | 1.50 (0.53 to 4.23) | 0.44    |
| <b>Discharge/Admission</b>        | 1.16 (0.70 to 1.92) | 0.58    |
| <b>Number of prescribed items</b> | 1.14 (1.12 to 1.17) | <0.001  |

Analysis contains only 2127 records (50.2%) where complete data was provided for all variables

\* Trust provided no data on number of prescription items

1  
2  
3 The authors wish to thank the reviewers for the opportunity to further improve this paper.

4  
5 Reviewer(s)' Comments to Author:

6  
7 Reviewer: Dr Penny Lewis, Clinical Lecturer, University of Manchester

8  
9 *I have no competing interests*

10  
11 *Thank you for responding to my comments. I think that the paper has improved significantly.*  
12 *However, there are a few comments I would like to make regarding this version.*

13  
14  
15 • *I am not sure that you provided a sufficient explanation as to why differences between*  
16 *Liverpool graduates were explored versus other university graduates. Is there something unique to*  
17 *this course? If you were to explore other universities might the results be different?*

18  
19 This has been clarified in the introduction. A large proportion of evaluated prescribers (30%)  
20 received undergraduate training at the University of Liverpool. The study was funded by the Mersey  
21 Deanery.

22  
23  
24 • *In the results it is stated that the lowest rates of errors were reported for the paediatrics*  
25 *speciality – in table 4 this speciality was not explored individually so I take it you are referring to the*  
26 *paediatric hospital as oppose to paediatric patients from across the different hospitals? Or was this*  
27 *data collected from all paediatric patients seen across all hospitals?*

28  
29 This refers to the error rate observed for the paediatrics specialty hospital; this has been clarified in  
30 the text

31  
32 • *Risk factor analysis: 'All factors considered appeared to show a significant difference except*  
33 *for medical school training'. Perhaps this should be 'except for whether a doctor was trained at*  
34 *Liverpool medical school or not' as the study only tested for a difference between Liverpool graduates*  
35 *and other medical school graduates.*

36  
37 The wording has been changed as suggested

38  
39 • *One of the main findings of this study, as stated in the key messages, was that prescribing*  
40 *errors increased by 14% for every additional medication item prescribed but there is no discussion as*  
41 *to what this might mean for practice.*

42  
43  
44 The following has been added to the discussion: 'In multivariate analysis, the strongest predictor for  
45 prescribing error was the number of medicines on each prescription, with risk for prescribing errors  
46 increasing by 14% for every additional medication item prescribed. Complex polypharmacy is  
47 becoming increasingly common, with patients potentially requiring management for multiple  
48 chronic conditions simultaneously. In these patients, vigilance for prescribing errors and pharmacist  
49 review is of particular importance.'

50  
51  
52  
53 • *It is stated that 'A study in Spain compared paediatric wards with obstetrics found the*  
54 *paediatric patients had a fourfold higher risk of serious errors then maternity population' – and then*  
55 *stated that this is in line with own findings but I didn't see anything in the results regarding severity*  
56 *of errors across different patient groups. I think is a simple misconception due to the way the*  
57 *paragraph is phrased.*

1  
2  
3  
4 The paragraph has been rephrased and now reads: 'A study in Spain comparing paediatric wards  
5 with obstetrics found that paediatric patients had a fourfold higher risk of serious errors than the  
6 maternity population (2.3% vs 14.3%), which were mainly related to drug dosing. We observed a  
7 low error rate for the paediatrics specialty hospital, although this was likely due to a low number of  
8 prescribed items.'

9  
10  
11 • *Finally by grouping errors into categories according to the origin we sought to reduce*  
12 *misclassification as far as possible – could you explain this further as I'm not sure what is meant by*  
13 *this.*

14  
15 This sentence has been altered and now reads: 'Finally, in order to limit the impact of error  
16 misclassification, the original 29 error categories were batched into 10 different types of error  
17 groups relating to key components of prescribing.'

18  
19  
20 • *The final conclusion of the paper states that removing safeguards such as pharmacists could*  
21 *lead to higher numbers of errors but the 'key messages' of the paper are that you found no difference*  
22 *in error rate by grade and the strongest predictor for prescribing error was the number of medicines.*  
23 *So I am not sure of the link between this and the overall aims/key messages. If this is the main*  
24 *conclusion then maybe there should be some mention of these safeguards in the introduction.*

25  
26 The following sentence has been added to the introduction, in the paragraph relating to the  
27 background of error. 'Barriers which may prevent medication errors, or prevent errors from reaching  
28 the patient, may include electronic prescribing alerts, and prescription review by clinical  
29 pharmacists.'

30  
31 The conclusion now states that as prescribing errors are prevalent in secondary care and are made  
32 by all grades of prescribers, removing safeguards (ie pharmacists) could lead to more errors actually  
33 reaching patients. We referred to the particular importance of pharmacists in clinical areas  
34 associated with high risk; patients with polypharmacy and admission areas are now given as  
35 examples. This now relates our key findings to the importance as pharmacists as 'safeguards'.

36  
37  
38 • *Overall, the study presents some very interesting data but I believe that the paper could be*  
39 *improved upon further, linking the key findings, introduction and discussion better and clarifying the*  
40 *important findings e.g. is the main message of the work that pharmacists should never be removed*  
41 *from their role or that there is no link between experience and number of errors made.*

42  
43 The main message links both aspects. Our key findings are that grade of prescriber does not affect  
44 error rate and that increased number of prescribed items increases risk of errors. We conclude that  
45 prescribing errors are prevalent, regardless of the grade of prescriber, therefore a key role of clinical  
46 pharmacists is to ensure that errors are less likely to reach patients. Potential barriers to prescribing  
47 errors have now been mentioned in the introduction. Further comment on number of prescribed  
48 items conferring higher risk for prescribing errors has been added to the discussion.  
49  
50  
51  
52  
53  
54  
55  
56  
57  
58  
59  
60

STROBE Statement—Checklist of items that should be included in reports of *cross-sectional studies*

|                              | Item No | Recommendation                                                                                                                                                                                               |     |
|------------------------------|---------|--------------------------------------------------------------------------------------------------------------------------------------------------------------------------------------------------------------|-----|
| <b>Title and abstract</b>    | 1       | (a) Indicate the study's design with a commonly used term in the title or the abstract                                                                                                                       | √   |
|                              |         | (b) Provide in the abstract an informative and balanced summary of what was done and what was found                                                                                                          | √   |
| <b>Introduction</b>          |         |                                                                                                                                                                                                              |     |
| Background/rationale         | 2       | Explain the scientific background and rationale for the investigation being reported                                                                                                                         | √   |
| Objectives                   | 3       | State specific objectives, including any prespecified hypotheses                                                                                                                                             | √   |
| <b>Methods</b>               |         |                                                                                                                                                                                                              |     |
| Study design                 | 4       | Present key elements of study design early in the paper                                                                                                                                                      | √   |
| Setting                      | 5       | Describe the setting, locations, and relevant dates, including periods of recruitment, exposure, follow-up, and data collection                                                                              | √   |
| Participants                 | 6       | (a) Give the eligibility criteria, and the sources and methods of selection of participants                                                                                                                  | √   |
| Variables                    | 7       | Clearly define all outcomes, exposures, predictors, potential confounders, and effect modifiers. Give diagnostic criteria, if applicable                                                                     | √   |
| Data sources/<br>measurement | 8*      | For each variable of interest, give sources of data and details of methods of assessment (measurement). Describe comparability of assessment methods if there is more than one group                         | √   |
| Bias                         | 9       | Describe any efforts to address potential sources of bias                                                                                                                                                    | √   |
| Study size                   | 10      | Explain how the study size was arrived at                                                                                                                                                                    | √   |
| Quantitative variables       | 11      | Explain how quantitative variables were handled in the analyses. If applicable, describe which groupings were chosen and why                                                                                 | √   |
| Statistical methods          | 12      | (a) Describe all statistical methods, including those used to control for confounding                                                                                                                        | √   |
|                              |         | (b) Describe any methods used to examine subgroups and interactions                                                                                                                                          | √   |
|                              |         | (c) Explain how missing data were addressed                                                                                                                                                                  | √   |
|                              |         | (d) If applicable, describe analytical methods taking account of sampling strategy                                                                                                                           | √   |
|                              |         | (e) Describe any sensitivity analyses                                                                                                                                                                        | √   |
| <b>Results</b>               |         |                                                                                                                                                                                                              |     |
| Participants                 | 13*     | (a) Report numbers of individuals at each stage of study—eg numbers potentially eligible, examined for eligibility, confirmed eligible, included in the study, completing follow-up, and analysed            | n/a |
|                              |         | (b) Give reasons for non-participation at each stage                                                                                                                                                         | n/a |
|                              |         | (c) Consider use of a flow diagram                                                                                                                                                                           | n/a |
| Descriptive data             | 14*     | (a) Give characteristics of study participants (eg demographic, clinical, social) and information on exposures and potential confounders                                                                     | √   |
|                              |         | (b) Indicate number of participants with missing data for each variable of interest                                                                                                                          | √   |
| Outcome data                 | 15*     | Report numbers of outcome events or summary measures                                                                                                                                                         | √   |
| Main results                 | 16      | (a) Give unadjusted estimates and, if applicable, confounder-adjusted estimates and their precision (eg, 95% confidence interval). Make clear which confounders were adjusted for and why they were included | √   |



|                          |    |                                                                                                                                                                            |   |
|--------------------------|----|----------------------------------------------------------------------------------------------------------------------------------------------------------------------------|---|
|                          |    | (b) Report category boundaries when continuous variables were categorized                                                                                                  | √ |
|                          |    | (c) If relevant, consider translating estimates of relative risk into absolute risk for a meaningful time period                                                           | √ |
| Other analyses           | 17 | Report other analyses done—eg analyses of subgroups and interactions, and sensitivity analyses                                                                             | √ |
| <b>Discussion</b>        |    |                                                                                                                                                                            |   |
| Key results              | 18 | Summarise key results with reference to study objectives                                                                                                                   | √ |
| Limitations              | 19 | Discuss limitations of the study, taking into account sources of potential bias or imprecision. Discuss both direction and magnitude of any potential bias                 | √ |
| Interpretation           | 20 | Give a cautious overall interpretation of results considering objectives, limitations, multiplicity of analyses, results from similar studies, and other relevant evidence | √ |
| Generalisability         | 21 | Discuss the generalisability (external validity) of the study results                                                                                                      | √ |
| <b>Other information</b> |    |                                                                                                                                                                            |   |
| Funding                  | 22 | Give the source of funding and the role of the funders for the present study and, if applicable, for the original study on which the present article is based              | √ |

\*Give information separately for exposed and unexposed groups.

**Note:** An Explanation and Elaboration article discusses each checklist item and gives methodological background and published examples of transparent reporting. The STROBE checklist is best used in conjunction with this article (freely available on the Web sites of PLoS Medicine at <http://www.plosmedicine.org/>, Annals of Internal Medicine at <http://www.annals.org/>, and Epidemiology at <http://www.epidem.com/>). Information on the STROBE Initiative is available at [www.strobe-statement.org](http://www.strobe-statement.org).

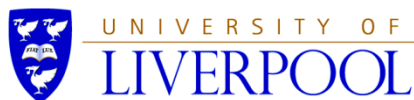

1  
2  
3  
4  
5  
6  
7 TO: Editor  
8 BMJ Open

Professor S H Khoo, MD, FRCP, DTM&H  
Department of Pharmacology & Therapeutics

9  
10 Pharmacology Research Laboratories  
11 Block H, First Floor  
12 70 Pembroke Place  
13 Liverpool  
14 L69 3GF

15 T 0151 794 5560  
16 F 0151 794 5656  
17 E khoo@liverpool.ac.uk

18 31st August 2012.

19  
20  
21 Dear Editor

22  
23 **Re: Cross Sectional Study of Prescribing Error in Patients Admitted to Nine Hospitals Across North**  
24 **West England**

25  
26  
27 Please find enclosed our manuscript for your consideration. The BMJ Group Journals have a long and  
28 honourable tradition of championing patient safety, and publishing research which seeks to  
29 characterise, understand and limit harms resulting from medication error. Earlier this year, Ingrid  
30 Torjesen's article highlighted findings from two of the UK's largest studies into prescribing error in  
31 primary and secondary care (the PRACTiCe and EQUIP studies respectively) [Torjesen *I. BMJ* 2 May  
32 2012]. Both studies have released study reports on the GMC website, but neither has yet been  
33 published in a peer-reviewed journal.  
34

35  
36  
37 Our sample size is comparable to EQUIP, and larger than PRACTiCe, and our observed error rate of  
38 ~10% of medication items prescribed is similar to EQUIP (9%) and PRACTiCe (4%), using a modified  
39 version of EQUIP definitions. By analysing error within complete individual prescriptions (rather than  
40 individual medication items) we show that a significant proportion of patients were exposed to  
41 prescribing error, and that this risk increased by 14% for every medication item added to their  
42 prescription. Risk of error did not vary with hospital, seniority of prescriber or medical school  
43 training, but acute medical admission scenarios were associated with highest risk of error (mainly  
44 arising from unintended medication omission). Finally, electronic prescribing and medication  
45 administration systems could only have prevented up to a quarter of these errors, highlighting the  
46 important role of the ward pharmacist, particularly in high-pressure acute areas.  
47

48  
49  
50 We believe these results are likely to accurately reflect the prevalence of prescribing error more  
51 generally throughout the UK, and to consequently inform health policy which seeks to minimise  
52 patient harms through improvements in health systems. Thank you for considering this for  
53 publication in BMJ Open.  
54

55 With best wishes,

56  
57  
58  
59  
60

Professor S.H. Khoo  
Institute of Translational Medicine  
University of Liverpool
